# Supplementary material
Source: Royal Society of Chemistry journal article supplement (doi:10.1039/d6ob00499g)
Supplement: d6ob00499g1.pdf [file d6ob00499g1.pdf]

## Hydrazine hydrate facilitates efficient synthesis of cyclodipeptides for antibacterial screening

Zhikun Lei,<sup>a</sup> Chuanbao Wang,<sup>a</sup> Yu Du,<sup>ac</sup> Yaxin Wang,<sup>ac</sup> Jinkui Teng,<sup>ac</sup>

Xiaoping Guo<sup>ac</sup>, Yun-Bao Jiang<sup>b\*</sup> and Xiaosheng Yan<sup>abc\*</sup>

<sup>a</sup> Fujian Provincial Key Laboratory of Innovative Drug Target Research, State Key Laboratory of Vaccines for Infectious Diseases, Xiang An Biomedicine Laboratory, School of Pharmaceutical Sciences, Xiamen University, Xiamen, Fujian 361102, China.

<sup>b</sup> Department of Chemistry, College of Chemistry and Chemical Engineering, The MOE Key Laboratory of Spectrochemical Analysis and Instrumentation, Xiamen University, Xiamen 361005, China.

<sup>c</sup> Jiujiang Research Institute of Xiamen University, Jiujiang, Jiangxi 332000, China.

\*E-mail: ybjiang@xmu.edu.cn; xshyan@xmu.edu.cn.

### Supporting Information

#### Contents

|                                                            |     |
|------------------------------------------------------------|-----|
| 1. Syntheses and characterizations.....                    | S2  |
| 2. Chiral HPLC traces.....                                 | S18 |
| 3. Absorption and CD spectra.....                          | S19 |
| 4. Crystal data.....                                       | S21 |
| 5. <sup>1</sup> H NMR and <sup>13</sup> C NMR spectra..... | S24 |
| 6. HRMS spectra.....                                       | S56 |

## 1. Syntheses and characterizations

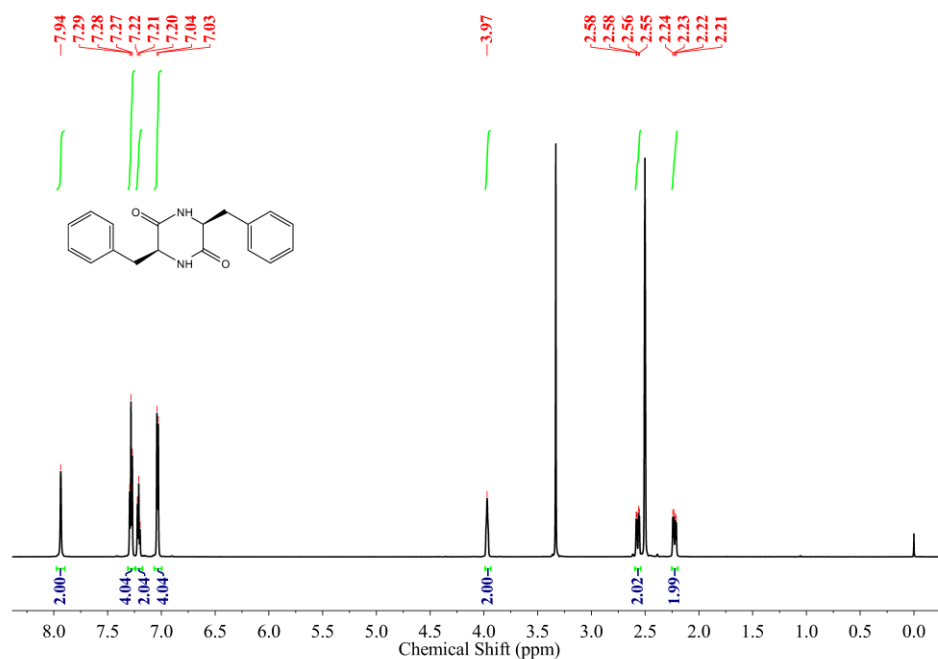

**Figure S1.**  $^1\text{H}$  NMR spectrum (600 MHz,  $\text{DMSO-}d_6$ ) of the product obtained via the synthetic route depicted in **Scheme 2**. The presence of only one set of proton signals for the phenylalanine residues indicates a high degree of structural symmetry, consistent with the cyclic diphenylalanine structure **1**.

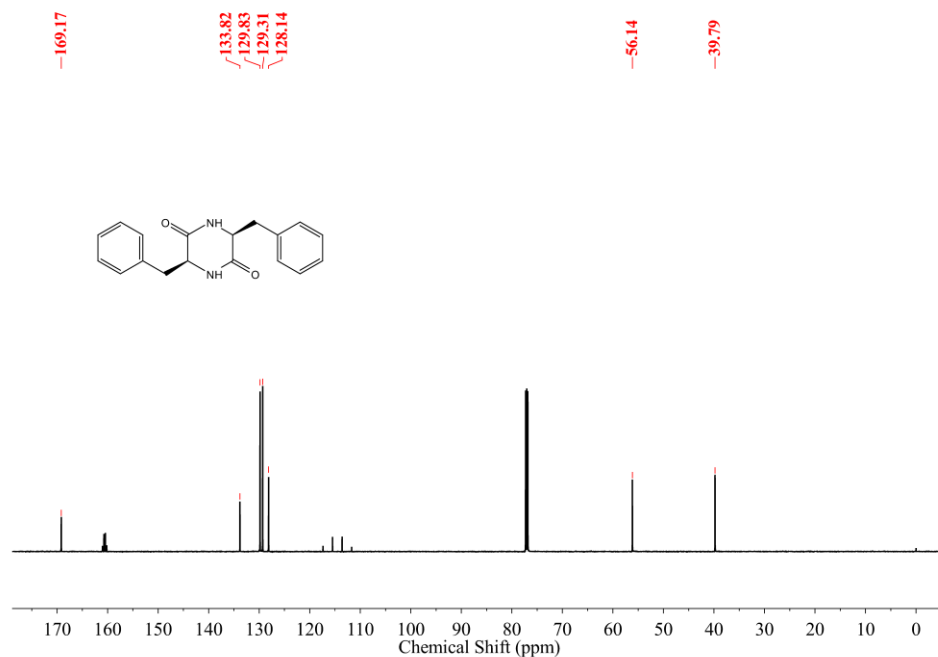

**Figure S2.**  $^{13}\text{C}$  NMR spectrum (151 MHz,  $\text{CDCl}_3\text{-CF}_3\text{COOH}$ ) of the product obtained via the synthetic route depicted in **Scheme 2**, which is consistent with the structure of cyclic diphenylalanine **1**.

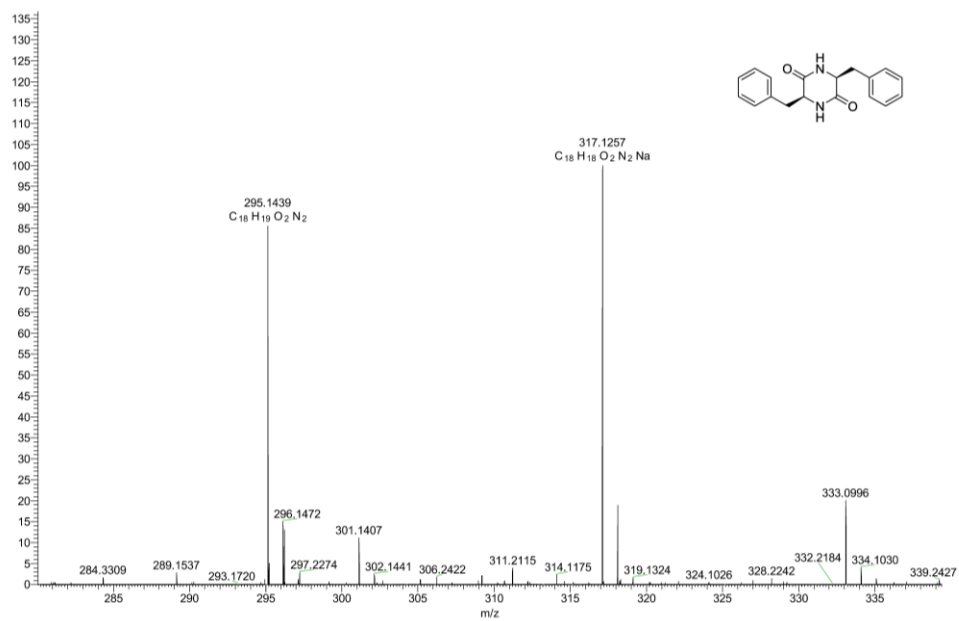

**Figure S3.** HRMS spectrum of the product obtained via the synthetic route depicted in **Scheme 2**, which is consistent with the structure of cyclic diphenylalanine **1**.

**Table S1.** Crystal data and structure refinement for the product obtained via the synthetic route depicted in **Scheme 2** <sup>a</sup>

| Identification code                         | exp_6055_auto                                                 |
|---------------------------------------------|---------------------------------------------------------------|
| Empirical formula                           | C <sub>18</sub> H <sub>18</sub> N <sub>2</sub> O <sub>2</sub> |
| Formula weight                              | 294.34                                                        |
| Temperature/K                               | 100.00(10)                                                    |
| Crystal system                              | orthorhombic                                                  |
| Space group                                 | P2 <sub>1</sub> 2 <sub>1</sub> 2                              |
| a/Å                                         | 23.3026(3)                                                    |
| b/Å                                         | 10.36460(10)                                                  |
| c/Å                                         | 6.15900(10)                                                   |
| α/°                                         | 90                                                            |
| β/°                                         | 90                                                            |
| γ/°                                         | 90                                                            |
| Volume/Å <sup>3</sup>                       | 1487.53(3)                                                    |
| Z                                           | 4                                                             |
| ρ <sub>calc</sub> /cm <sup>3</sup>          | 1.314                                                         |
| μ/mm <sup>-1</sup>                          | 0.695                                                         |
| F(000)                                      | 624.0                                                         |
| Crystal size/mm <sup>3</sup>                | 0.26 × 0.22 × 0.18                                            |
| Radiation                                   | CuKα (λ = 1.54184)                                            |
| 2θ range for data collection/°              | 7.588 to 153.79                                               |
| Index ranges                                | -29 ≤ h ≤ 29, -12 ≤ k ≤ 13, -5 ≤ l ≤ 7                        |
| Reflections collected                       | 14316                                                         |
| Independent reflections                     | 3036 [R <sub>int</sub> = 0.0479, R <sub>sigma</sub> = 0.0340] |
| Data/restraints/parameters                  | 3036/0/199                                                    |
| Goodness-of-fit on F <sup>2</sup>           | 1.080                                                         |
| Final R indexes [I ≥ 2σ (I)]                | R <sub>1</sub> = 0.0450, wR <sub>2</sub> = 0.1229             |
| Final R indexes [all data]                  | R <sub>1</sub> = 0.0471, wR <sub>2</sub> = 0.1242             |
| Largest diff. peak/hole / e Å <sup>-3</sup> | 0.31/-0.24                                                    |
| Flack parameter                             | 0.09(14)                                                      |

<sup>a</sup> Grown in DMSO solution via slow evaporation.

**Table S2.** Yields of **1** obtained in the cyclization reactions using 36.2 mg of **1-a** in EtOH (1.0 mL) stirred at 25 °C for 12 h in the presence of different amounts of N<sub>2</sub>H<sub>4</sub>·H<sub>2</sub>O

| Entry | N <sub>2</sub> H <sub>4</sub> ·H <sub>2</sub> O / equiv | Yield / % <sup>a</sup> |
|-------|---------------------------------------------------------|------------------------|
| 1     | 0                                                       | 0                      |
| 2     | 0.5                                                     | 34                     |
| 3     | 1.0                                                     | 74                     |
| 4     | 2.0                                                     | 97                     |

<sup>a</sup> Reaction yields determined by <sup>1</sup>H NMR spectra.

**Table S3.** Yields of **1** obtained in the cyclization reactions using 36.2 mg of **1-a** in EtOH (1.0 mL) stirred at different temperatures for 12 h in the presence of 2.0 equiv N<sub>2</sub>H<sub>4</sub>·H<sub>2</sub>O

| Entry | T / °C | Yield / % <sup>a</sup> |
|-------|--------|------------------------|
| 1     | 25     | 97                     |
| 2     | 40     | 97                     |
| 3     | 60     | 99                     |
| 4     | 80     | 99                     |

<sup>a</sup> Reaction yields determined by <sup>1</sup>H NMR spectra.

**Table S4.** Yields of **1** obtained in the cyclization reactions using 36.2 mg of **1-a** in EtOH (1.0 mL) stirred at 25 °C for different durations in the presence of 2.0 equiv N<sub>2</sub>H<sub>4</sub>·H<sub>2</sub>O

| Entry | Time / h | Yield / % <sup>a</sup> |
|-------|----------|------------------------|
| 1     | 3        | 65                     |
| 2     | 6        | 82                     |
| 3     | 12       | 97                     |
| 4     | 24       | 98                     |

<sup>a</sup> Reaction yields determined by <sup>1</sup>H NMR spectra.

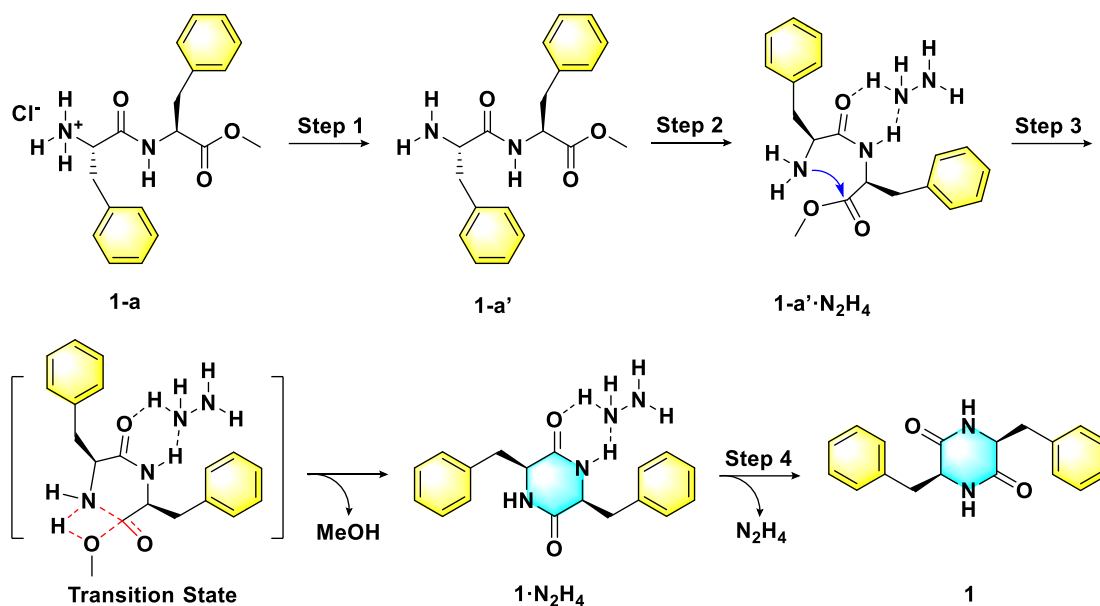

**Scheme S1.** Plausible mechanism for the intramolecular aminolysis cyclization. The efficient cyclization of the linear dipeptide to the diketopiperazine **1** is facilitated by the multifunctional role of hydrazine hydrate ( $\text{N}_2\text{H}_4 \cdot \text{H}_2\text{O}$ ). The process involves initial deprotonation, conformational preorganization via hydrogen bonding, and a concerted cyclization step, accounting for the mild reaction conditions and high yield.

**Step 1:** Deprotonation. One equivalent of  $\text{N}_2\text{H}_4 \cdot \text{H}_2\text{O}$  acts as a mild base to deprotonate the hydrochloride salt (**1-a**), affording the free linear dipeptide (**1-a'**).

**Step 2:** Preorganization. A second equivalent of hydrazine forms hydrogen bonds with the dipeptide backbone, shifting the conformational equilibrium towards the otherwise disfavored *cis*-amide conformer. This brings the nucleophilic amine into close proximity to the methyl ester.

**Step 3:** Concerted Cyclization. In the basic microenvironment, intramolecular aminolysis proceeds via a low-energy cyclic transition state involving hydrazine-mediated proton shuttling. This yields the cyclic dipeptide-hydrazine complex (**1·N<sub>2</sub>H<sub>4</sub>**).

**Step 4:** Isolation. The free diketopiperazine **1** precipitates directly from the reaction mixture and is obtained after simple washing to remove residual hydrazine.

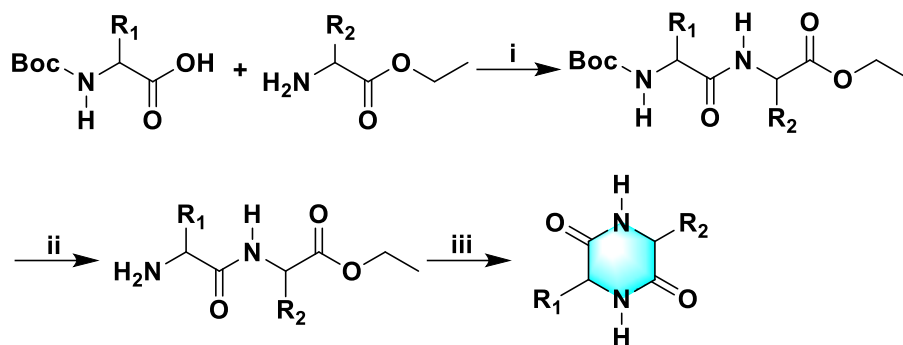

**Scheme S2.** Developed three-step synthetic procedure for cyclodipeptides using *N*-Boc-protected amino acids and amino acid ethyl ester as initial substrates.

(i) To a chilled solution of Boc-protected amino acid containing  $R_1$  side chain (10.0 mmol) and  $\text{Et}_3\text{N}$  (10.0 mmol) in  $\text{CHCl}_3$  (30 mL) was added 1-hydroxybenzotriazole (HOBT, 11.0 mmol), 1-(3-dimethylaminopropyl)-3-ethylcarbodiimide hydrochloride (EDCI, 11.0 mmol) at 0 °C. After stir for 30 min, amino acid ethyl ester hydrochloride containing  $R_2$  side chain (10.0 mmol) was added. The mixture was left to stand at room temperature for 24 hours, evaporated *in vacuo*, and the solid residue was dissolved in EtOAc. The solution was washed successively with 1%  $\text{NH}_3\cdot\text{H}_2\text{O}$ , 1% HCl and saturated NaCl, dried over anhydrous  $\text{Na}_2\text{SO}_4$  and concentrated under reduced pressure, to obtain Boc-protected dipeptide ethyl ester.

(ii) 10 mL  $\text{CH}_2\text{Cl}_2$  and 10 mL  $\text{CF}_3\text{COOH}$  was added in Boc-protected dipeptide ethyl ester, and then the solution was stirred at room temperature for 5 hours, evaporated *in vacuo* at room temperature to obtain dipeptide ethyl ester in the trifluoroacetate salt form.

(iii) To the solution of dipeptide ethyl ester in EtOH (30 mL),  $\text{N}_2\text{H}_4\cdot\text{H}_2\text{O}$  (85%, 6 mL, 11 equiv) was added, and then the solution was stirred at 25 °C for 24 hours, evaporated *in vacuo* at room temperature. Purification via washing by ethyl ether or recrystallization, to obtain pure cyclodipeptide product.

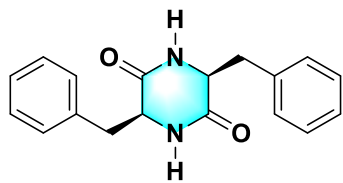

**1:** Purification via washing by ethyl ether to obtain 2.66 g white solid. Overall yield: 90%. Mp > 320.0 °C.  $[\alpha]_D = -114.0^\circ$  (*c* 0.1, DMSO). IR (KBr): 3211  $\text{cm}^{-1}$ , 3054  $\text{cm}^{-1}$ , 2947  $\text{cm}^{-1}$ , 1665  $\text{cm}^{-1}$ , 1457  $\text{cm}^{-1}$ , 1336  $\text{cm}^{-1}$ , 760  $\text{cm}^{-1}$ , 700  $\text{cm}^{-1}$ .  $^1\text{H}$  NMR (600 MHz,

DMSO- $d_6$ ):  $\delta$  (ppm) 7.94 (s, 2H), 7.28 (t,  $J = 7.5$  Hz, 4H), 7.21 (t,  $J = 7.3$  Hz, 2H), 7.03 (d,  $J = 7.3$  Hz, 4H), 3.97 (s, 2H), 2.57 (dd,  $J = 13.6, 4.7$  Hz, 2H), 2.23 (dd,  $J = 13.6, 6.1$  Hz, 2H).  $^{13}\text{C}$  NMR (151 MHz,  $\text{CDCl}_3\text{-CF}_3\text{COOH}$ ):  $\delta$  (ppm) 169.17, 133.82, 129.83, 129.31, 128.14, 56.14, 39.79. HRMS (ESI): calcd for  $[\text{C}_{18}\text{H}_{19}\text{N}_2\text{O}_2]^+$ : 295.1441, found: 295.1439.

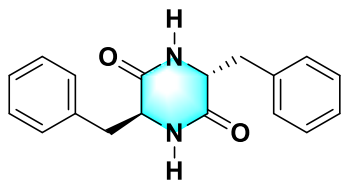

**2:** Purification via washing by ethyl ether to obtain 2.66 g white solid. Overall yield: 90%. Mp = 293.6~295.2 °C.  $[\alpha]_D = 0.0^\circ$  (*c* 0.1, DMSO). IR (KBr): 3202  $\text{cm}^{-1}$ , 3077  $\text{cm}^{-1}$ , 2970  $\text{cm}^{-1}$ , 1675  $\text{cm}^{-1}$ , 1455  $\text{cm}^{-1}$ , 1330  $\text{cm}^{-1}$ , 845  $\text{cm}^{-1}$ , 700  $\text{cm}^{-1}$ .  $^1\text{H}$  NMR (600

MHz, DMSO-*d*<sub>6</sub>):  $\delta$  (ppm) 8.04 (s, 2H), 7.29 – 7.18 (m, 6H), 7.13 (d, *J* = 6.7 Hz, 4H), 3.39 (s, 2H), 3.00 (dd, *J* = 13.5, 3.1 Hz, 2H), 2.72 (dd, *J* = 13.6, 4.6 Hz, 2H).  $^{13}\text{C}$  NMR (151 MHz, CDCl<sub>3</sub>-CF<sub>3</sub>COOH):  $\delta$  (ppm) 170.42, 133.24, 129.71, 129.25, 128.22, 55.45, 39.00. HRMS (ESI): calcd for [C<sub>18</sub>H<sub>19</sub>N<sub>2</sub>O<sub>2</sub>]<sup>+</sup>: 295.1441, found: 295.1436.

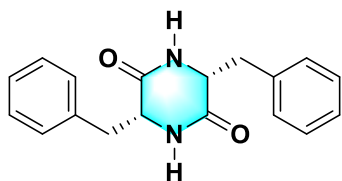

**3:** Purification via washing by ethyl ether to obtain 2.68 g white solid. Overall yield: 91%. Mp > 320.0 °C.  $[\alpha]_D = +114.0^\circ$  (*c* 0.1, DMSO). IR (KBr): 3206  $\text{cm}^{-1}$ , 3060  $\text{cm}^{-1}$ , 2958  $\text{cm}^{-1}$ , 1669  $\text{cm}^{-1}$ , 1457  $\text{cm}^{-1}$ , 1342  $\text{cm}^{-1}$ , 756  $\text{cm}^{-1}$ , 700  $\text{cm}^{-1}$ .  $^1\text{H}$  NMR (600 MHz,

DMSO-*d*<sub>6</sub>):  $\delta$  (ppm) 7.93 (s, 2H), 7.28 (t, *J* = 7.5 Hz, 4H), 7.21 (t, *J* = 7.2 Hz, 2H), 7.03 (d, *J* = 7.5 Hz, 4H), 3.97 (s, 2H), 2.57 (dd, *J* = 13.6, 4.8 Hz, 2H), 2.23 (dd, *J* = 13.6, 6.2 Hz, 2H).  $^{13}\text{C}$  NMR (151 MHz, CDCl<sub>3</sub>-CF<sub>3</sub>COOH):  $\delta$  (ppm) 169.02, 133.86, 129.82, 129.28, 128.09, 56.13, 39.79. HRMS (ESI): calcd for [C<sub>18</sub>H<sub>19</sub>N<sub>2</sub>O<sub>2</sub>]<sup>+</sup>: 295.1441, found: 295.1466.

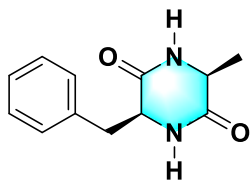

**4:** Purification via washing by ethyl ether to obtain 1.73 g white solid. Overall yield: 79%. Mp = 295.6~297.2 °C.  $[\alpha]_D = -6.7^\circ$  (*c* 0.1, DMSO). IR (KBr): 3190  $\text{cm}^{-1}$ , 3046  $\text{cm}^{-1}$ , 2984  $\text{cm}^{-1}$ , 2902  $\text{cm}^{-1}$ , 1667  $\text{cm}^{-1}$ , 1463  $\text{cm}^{-1}$ , 1336  $\text{cm}^{-1}$ , 869  $\text{cm}^{-1}$ , 698  $\text{cm}^{-1}$ .  $^1\text{H}$  NMR (600 MHz, DMSO-*d*<sub>6</sub>):  $\delta$

(ppm) 8.12 (s, 1H), 8.02 (s, 1H), 7.28 (t, *J* = 7.4 Hz, 2H), 7.22 (t, *J* = 7.3 Hz, 1H), 7.15 (d, *J* = 7.0 Hz, 2H), 4.17 (s, 1H), 3.62 (q, *J* = 6.9 Hz, 1H), 3.12 (dd, *J* = 13.4, 3.7 Hz, 1H), 2.85 (dd, *J* = 13.4, 4.9 Hz, 1H), 0.46 (d, *J* = 7.0 Hz, 3H).  $^{13}\text{C}$  NMR (151 MHz, DMSO-*d*<sub>6</sub>):  $\delta$  (ppm) 168.13, 166.28, 136.52, 130.84, 128.49, 127.12, 55.82, 50.17, 38.78, 20.16. HRMS (ESI): calcd for [C<sub>12</sub>H<sub>15</sub>N<sub>2</sub>O<sub>2</sub>]<sup>+</sup>: 219.1123, found: 219.1135.

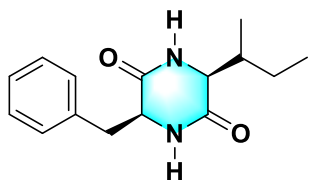

**5:** Purification via washing by ethyl ether to obtain 2.14 g white solid. Overall yield: 82%. Mp = 271.2~272.9 °C.  $[\alpha]_D = -58.3^\circ$  (*c* 0.1, DMSO). IR (KBr): 3192  $\text{cm}^{-1}$ , 3056  $\text{cm}^{-1}$ , 2966  $\text{cm}^{-1}$ , 2880  $\text{cm}^{-1}$ , 1667  $\text{cm}^{-1}$ , 1455  $\text{cm}^{-1}$ , 1334  $\text{cm}^{-1}$ , 859  $\text{cm}^{-1}$ , 700  $\text{cm}^{-1}$ .  $^1\text{H}$  NMR (600

MHz, DMSO-*d*<sub>6</sub>):  $\delta$  (ppm) 8.10 (s, 1H), 7.88 (s, 1H), 7.50 – 6.78 (m, 5H), 4.21 (s, 1H), 3.58 (s, 1H), 3.16 (dd, *J* = 13.2, 3.0 Hz, 1H), 2.85 (dd, *J* = 13.2, 4.2 Hz, 1H), 1.40 (s, 1H), 0.66 (q, *J* = 15.3, 10.2 Hz, 1H), 0.62 – 0.47 (m, 7H).  $^{13}\text{C}$  NMR (151 MHz, DMSO-*d*<sub>6</sub>):  $\delta$  (ppm) 166.87, 166.82,

136.76, 130.89, 128.37, 126.94, 59.18, 55.48, 38.24, 38.04, 23.58, 14.91, 12.26. HRMS (ESI): calcd for  $[C_{15}H_{21}N_2O_2]^+$ : 261.1592, found: 261.1590.

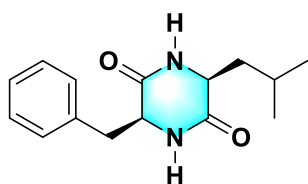

**6:** Purification via washing by ethyl ether to obtain 2.17 g white solid. Overall yield: 83%. Mp = 279.8~280.7 °C.  $[\alpha]_D = -26.0^\circ$  (c 0.1, DMSO). IR (KBr): 3194  $cm^{-1}$ , 3048  $cm^{-1}$ , 2964  $cm^{-1}$ , 2892  $cm^{-1}$ , 1677  $cm^{-1}$ , 1461  $cm^{-1}$ , 1336  $cm^{-1}$ , 1095  $cm^{-1}$ , 846  $cm^{-1}$ , 758  $cm^{-1}$ , 705  $cm^{-1}$ .  $^1H$  NMR (600 MHz, DMSO- $d_6$ ):  $\delta$  (ppm) 8.10 (s, 1H), 8.06 (s, 1H), 7.27 (t,  $J = 7.3$  Hz, 2H), 7.22 (t,  $J = 7.3$  Hz, 1H), 7.14 (d,  $J = 7.0$  Hz, 2H), 4.16 (s, 1H), 3.51 – 3.43 (m, 1H), 3.13 (dd,  $J = 13.4, 3.8$  Hz, 1H), 2.83 (dd,  $J = 13.4, 4.9$  Hz, 1H), 1.48 – 1.37 (m, 1H), 0.82 – 0.72 (m, 1H), 0.63 (d,  $J = 6.5$  Hz, 3H), 0.60 (d,  $J = 6.6$  Hz, 3H), 0.16 – 0.07 (m, 1H).  $^{13}C$  NMR (151 MHz, DMSO- $d_6$ ):  $\delta$  (ppm) 167.93, 166.59, 136.57, 130.85, 128.55, 127.19, 55.91, 52.72, 44.09, 38.92, 23.38, 23.27, 21.85. HRMS (ESI): calcd for  $[C_{15}H_{21}N_2O_2]^+$ : 261.1592, found: 261.1605.

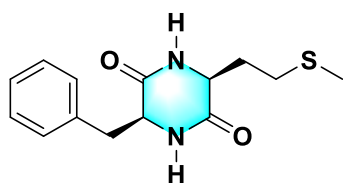

**7:** Purification via washing by ethyl ether to obtain 1.89 g white solid. Overall yield: 68%. Mp = 210.8~212.2 °C.  $[\alpha]_D = -42.3^\circ$  (c 0.1, DMSO). IR (KBr): 3455  $cm^{-1}$ , 3315  $cm^{-1}$ , 3190  $cm^{-1}$ , 3048  $cm^{-1}$ , 2978  $cm^{-1}$ , 2894  $cm^{-1}$ , 1669  $cm^{-1}$ , 1455  $cm^{-1}$ , 1344  $cm^{-1}$ , 1097  $cm^{-1}$ , 844  $cm^{-1}$ , 758  $cm^{-1}$ , 700  $cm^{-1}$ .  $^1H$  NMR (600 MHz, DMSO- $d_6$ ):  $\delta$  (ppm) 8.24 (s, 1H), 8.10 (s, 1H), 7.27 (t,  $J = 7.3$  Hz, 2H), 7.21 (t,  $J = 7.2$  Hz, 1H), 7.15 (d,  $J = 7.2$  Hz, 2H), 4.21 (s, 1H), 3.72 (s, 1H), 3.16 (dd,  $J = 13.4, 3.3$  Hz, 1H), 2.83 (dd,  $J = 13.4, 4.8$  Hz, 1H), 1.87 (s, 3H), 1.86 – 1.80 (m, 2H), 1.37 – 1.19 (m, 1H), 1.04 – 0.87 (m, 1H).  $^{13}C$  NMR (151 MHz, DMSO- $d_6$ ):  $\delta$  (ppm) 166.97, 166.56, 136.43, 130.87, 128.43, 127.28, 55.70, 53.35, 38.48, 33.27, 28.38, 14.89. HRMS (ESI): calcd for  $[C_{14}H_{19}N_2O_2S]^+$ : 279.1162, found: 279.1165.

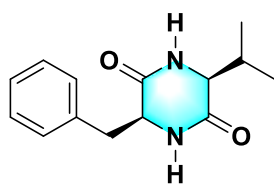

**8:** Purification via washing by ethyl ether to obtain 2.17 g white solid. Overall yield: 88%. Mp = 269.8~271.4 °C.  $[\alpha]_D = -54.0^\circ$  (c 0.1, DMSO). IR (KBr): 3202  $cm^{-1}$ , 3077  $cm^{-1}$ , 2970  $cm^{-1}$ , 1675  $cm^{-1}$ , 1455  $cm^{-1}$ , 1330  $cm^{-1}$ , 845  $cm^{-1}$ , 700  $cm^{-1}$ .  $^1H$  NMR (600 MHz, DMSO- $d_6$ ):  $\delta$  (ppm) 8.09 (s, 1H), 7.90 (s, 1H), 7.24 (t, 2H), 7.21 – 7.08 (m, 3H), 4.21 (s, 1H), 3.53 (s, 1H), 3.15 (dd,  $J = 13.5, 4.0$  Hz, 1H), 2.87 (dd,  $J = 13.5, 4.9$  Hz, 1H), 1.76 – 1.63 (m, 1H), 0.65 (d,  $J = 7.0$  Hz, 3H), 0.26 (d,  $J = 6.8$  Hz, 3H).  $^{13}C$  NMR (151 MHz, DMSO- $d_6$ ):  $\delta$  (ppm) 167.02, 166.89, 136.80, 130.79, 128.41, 126.96, 59.64, 55.50, 38.26, 31.47, 18.70, 16.63. HRMS (ESI): calcd for  $[C_{14}H_{19}N_2O_2]^+$ : 247.1436, found: 247.1435.

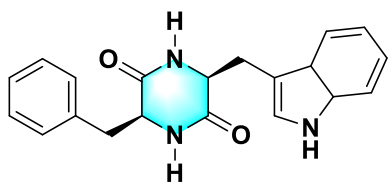

**9:** Purification via washing by ethyl ether to obtain 2.84 g white solid. Overall yield: 85%. Mp = 295.8~297.2 °C.  $[\alpha]_D = -112.2^\circ$  (*c* 0.1, DMSO). IR (KBr): 3420  $\text{cm}^{-1}$ , 3186  $\text{cm}^{-1}$ , 3058  $\text{cm}^{-1}$ , 2964  $\text{cm}^{-1}$ , 2878  $\text{cm}^{-1}$ , 1677  $\text{cm}^{-1}$ , 1457  $\text{cm}^{-1}$ , 1325

$\text{cm}^{-1}$ , 1089  $\text{cm}^{-1}$ , 742  $\text{cm}^{-1}$ .  $^1\text{H}$  NMR (600 MHz, DMSO- $d_6$ ):  $\delta$  (ppm) 10.89 (s, 1H), 7.91 (s, 1H), 7.71 (s, 1H), 7.48 (d,  $J = 7.8$  Hz, 1H), 7.32 (d,  $J = 8.1$  Hz, 1H), 7.22 – 7.13 (m, 3H), 7.07 (t,  $J = 7.4$  Hz, 1H), 6.99 (t,  $J = 7.5$  Hz, 1H), 6.96 (d,  $J = 1.1$  Hz, 1H), 6.71 (d,  $J = 6.6$  Hz, 2H), 3.97 (s, 1H), 3.86 (s, 1H), 2.80 (dd,  $J = 14.4, 4.2$  Hz, 1H), 2.54 (dd,  $J = 5.7$  Hz, 1H), 2.46 (dd,  $J = 13.4, 4.5$  Hz, 1H), 1.86 (dd,  $J = 13.4, 7.0$  Hz, 1H).  $^{13}\text{C}$  NMR (151 MHz, DMSO- $d_6$ ):  $\delta$  (ppm) 167.27, 166.65, 137.00, 136.51, 130.18, 128.51, 127.99, 126.84, 124.88, 121.36, 119.23, 118.89, 111.80, 109.28, 56.08, 55.73, 30.16. HRMS (ESI): calcd for  $[\text{C}_{20}\text{H}_{22}\text{N}_3\text{O}_2]^+$ : 336.1707, found: 336.1614.

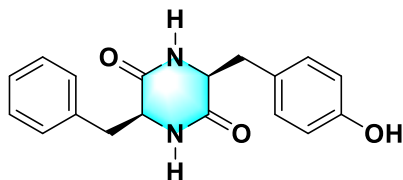

**10:** Purification via washing by ethyl ether to obtain 2.46 g white solid. Overall yield: 79%. Mp = 313.4~314.6 °C.  $[\alpha]_D = -137.3^\circ$  (*c* 0.1, DMSO). IR (KBr): 3535  $\text{cm}^{-1}$ , 3229  $\text{cm}^{-1}$ , 3091  $\text{cm}^{-1}$ , 3038  $\text{cm}^{-1}$ , 2962  $\text{cm}^{-1}$ , 2931  $\text{cm}^{-1}$ , 2855  $\text{cm}^{-1}$ , 1661  $\text{cm}^{-1}$ , 1613  $\text{cm}^{-1}$ , 1174  $\text{cm}^{-1}$ , 1513  $\text{cm}^{-1}$ , 1461  $\text{cm}^{-1}$ ,

1334  $\text{cm}^{-1}$ , 1270  $\text{cm}^{-1}$ , 1198  $\text{cm}^{-1}$ , 1093  $\text{cm}^{-1}$ , 812  $\text{cm}^{-1}$ , 758  $\text{cm}^{-1}$ , 698  $\text{cm}^{-1}$ , 651  $\text{cm}^{-1}$ .  $^1\text{H}$  NMR (600 MHz, DMSO- $d_6$ ):  $\delta$  (ppm) 9.21 (s, 1H), 7.84 (s, 2H), 7.28 (t,  $J = 7.5$  Hz, 2H), 7.20 (t,  $J = 7.4$  Hz, 1H), 7.04 (d,  $J = 7.2$  Hz, 2H), 6.83 (d,  $J = 8.4$  Hz, 2H), 6.67 (d,  $J = 8.4$  Hz, 2H), 3.94 (s, 1H), 3.89 (s, 1H), 2.58 (dd,  $J = 13.7, 4.9$  Hz, 1H), 2.52 (dd,  $J = 4.7$  Hz, 1H), 2.22 – 2.15 (m, 2H).  $^{13}\text{C}$  NMR (151 MHz,  $\text{CDCl}_3\text{-CF}_3\text{COOH}$ ):  $\delta$  (ppm) 169.50, 169.37, 154.50, 133.57, 131.12, 129.86, 129.35, 128.26, 126.46, 116.15, 56.23, 56.11, 39.75, 38.95. HRMS (ESI): calcd for  $[\text{C}_{18}\text{H}_{19}\text{N}_2\text{O}_3]^+$ : 311.1379, found: 311.1388.

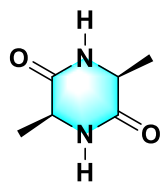

**11:** Purification via recrystallization to obtain 0.76 g white solid. Overall yield: 53%. Mp = 291.7~292.8 °C.  $[\alpha]_D = -44.0^\circ$  (*c* 0.1, DMSO). IR (KBr): 3196  $\text{cm}^{-1}$ , 3087  $\text{cm}^{-1}$ , 2986  $\text{cm}^{-1}$ , 2890  $\text{cm}^{-1}$ , 1685  $\text{cm}^{-1}$ , 1601  $\text{cm}^{-1}$ , 1434  $\text{cm}^{-1}$ , 1313  $\text{cm}^{-1}$ , 1153  $\text{cm}^{-1}$ , 1120  $\text{cm}^{-1}$ , 828  $\text{cm}^{-1}$ , 764  $\text{cm}^{-1}$ , 672  $\text{cm}^{-1}$ .  $^1\text{H}$  NMR (600 MHz,

DMSO- $d_6$ ):  $\delta$  (ppm) 8.08 (s, 2H), 3.90 (q,  $J = 6.8$  Hz, 2H), 1.25 (d,  $J = 6.9$  Hz, 6H).  $^{13}\text{C}$  NMR (151 MHz, DMSO- $d_6$ ):  $\delta$  (ppm) 169.53, 50.25, 18.98. HRMS (ESI): calcd for  $[\text{C}_6\text{H}_{11}\text{N}_2\text{O}_2]^+$ : 143.0810, found: 143.0814.

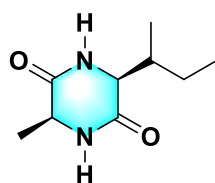

**12:** Purification via washing by ethyl ether to obtain 1.31 g white solid. Overall yield: 71%. Mp = 246.5~247.9 °C.  $[\alpha]_D = -52.9^\circ$  (*c* 0.1, DMSO). IR

(KBr): 3192 cm<sup>-1</sup>, 3077 cm<sup>-1</sup>, 2966 cm<sup>-1</sup>, 2873 cm<sup>-1</sup>, 1683 cm<sup>-1</sup>, 1432 cm<sup>-1</sup>, 1319 cm<sup>-1</sup>, 779 cm<sup>-1</sup>. <sup>1</sup>H NMR (600 MHz, DMSO-*d*<sub>6</sub>): δ (ppm) 8.12 (s, 1H), 7.98 (s, 1H), 3.88 (q, *J* = 6.9 Hz, 1H), 3.75 (s, 1H), 1.88 – 1.81 (m, 1H), 1.43 – 1.36 (m, 1H), 1.27 (d, 3H), 1.22 – 1.14 (m, 1H), 0.91 (d, *J* = 7.1 Hz, 3H), 0.85 (t, *J* = 7.4 Hz, 3H). <sup>13</sup>C NMR (151 MHz, DMSO-*d*<sub>6</sub>): δ (ppm) 169.04, 167.07, 59.24, 50.07, 38.43, 24.61, 20.33, 15.47, 12.38. HRMS (ESI): calcd for [C<sub>9</sub>H<sub>17</sub>N<sub>2</sub>O<sub>2</sub>]<sup>+</sup>: 185.1285, found: 185.1279.

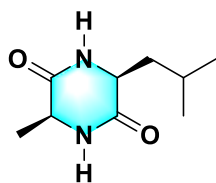

**13:** Purification via washing by ethyl ether to obtain 1.37 g white solid. Overall yield: 74%. Mp = 254.1~256.2 °C. [α]<sub>D</sub> = -63.7° (*c* 0.1, DMSO). IR (KBr): 3190 cm<sup>-1</sup>, 3087 cm<sup>-1</sup>, 2954 cm<sup>-1</sup>, 2878 cm<sup>-1</sup>, 1687 cm<sup>-1</sup>, 1447 cm<sup>-1</sup>, 1323 cm<sup>-1</sup>, 826 cm<sup>-1</sup>, 726 cm<sup>-1</sup>, 668 cm<sup>-1</sup>. <sup>1</sup>H NMR (600 MHz, DMSO-*d*<sub>6</sub>): δ (ppm) 8.12 (s, 1H), 8.10 (s, 1H), 3.86 (d, *J* = 6.5 Hz, 1H), 3.77 (s, 1H), 1.90 – 1.72 (m, 1H), 1.67 – 1.54 (m, 1H), 1.52 – 1.40 (m, 1H), 1.27 (d, *J* = 6.9 Hz, 3H), 0.88 (d, *J* = 6.5 Hz, 3H), 0.86 (d, *J* = 6.5 Hz, 3H). <sup>13</sup>C NMR (151 MHz, DMSO-*d*<sub>6</sub>): δ (ppm) 169.35, 168.85, 53.07, 50.37, 43.04, 24.08, 23.44, 22.34, 20.03. HRMS (ESI): calcd for [C<sub>9</sub>H<sub>17</sub>N<sub>2</sub>O<sub>2</sub>]<sup>+</sup>: 185.1284, found: 185.1284.

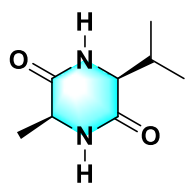

**14:** Purification via washing by ethyl ether to obtain 1.16 g white solid. Overall yield: 68%. Mp = 270.1~271.1 °C. [α]<sub>D</sub> = -64.0° (*c* 0.1, DMSO). IR (KBr): 3192 cm<sup>-1</sup>, 3052 cm<sup>-1</sup>, 2964 cm<sup>-1</sup>, 2896 cm<sup>-1</sup>, 1673 cm<sup>-1</sup>, 1459 cm<sup>-1</sup>, 1338 cm<sup>-1</sup>, 863 cm<sup>-1</sup>. <sup>1</sup>H NMR (600 MHz, DMSO-*d*<sub>6</sub>): δ (ppm) 8.14 (s, 1H), 8.00 (s, 1H), 3.88 (q, 1H), 3.68 (s, 1H), 2.20 – 2.11 (m, 1H), 1.27 (d, *J* = 7.0 Hz, 3H), 0.94 (d, *J* = 7.1 Hz, 3H), 0.83 (d, *J* = 6.8 Hz, 3H). <sup>13</sup>C NMR (151 MHz, DMSO-*d*<sub>6</sub>): δ (ppm) 169.16, 167.08, 59.84, 50.12, 31.51, 20.53, 18.96, 17.32. HRMS (ESI): calcd for [C<sub>8</sub>H<sub>15</sub>N<sub>2</sub>O<sub>2</sub>]<sup>+</sup>: 171.1123, found: 171.1123.

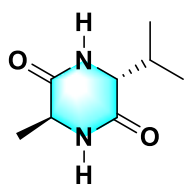

**15:** Purification via washing by ethyl ether to obtain 1.09 g white solid. Overall yield: 64%. Mp = 277.8~278.9 °C. [α]<sub>D</sub> = -15.7° (*c* 0.1, DMSO). IR (KBr): 3184 cm<sup>-1</sup>, 3048 cm<sup>-1</sup>, 2962 cm<sup>-1</sup>, 2884 cm<sup>-1</sup>, 1671 cm<sup>-1</sup>, 1447 cm<sup>-1</sup>, 1344 cm<sup>-1</sup>, 861 cm<sup>-1</sup>. <sup>1</sup>H NMR (600 MHz, DMSO-*d*<sub>6</sub>): δ (ppm) 8.13 (s, 1H), 8.10 (s, 1H), 3.92 (q, *J* = 6.9 Hz, 1H), 3.54 (t, *J* = 3.5 Hz, 1H), 2.15 – 2.06 (m, 1H), 1.24 (d, *J* = 6.9 Hz, 3H), 0.93 (d, *J* = 7.0 Hz, 3H), 0.85 (d, *J* = 6.8 Hz, 3H). <sup>13</sup>C NMR (151 MHz, DMSO-*d*<sub>6</sub>): δ (ppm) 169.39, 167.95, 60.73, 49.47, 32.66, 19.10, 19.03, 17.69. HRMS (ESI): calcd for [C<sub>8</sub>H<sub>15</sub>N<sub>2</sub>O<sub>2</sub>]<sup>+</sup>: 171.1123, found: 171.1127.

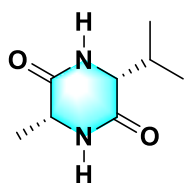

**16:** Purification via washing by ethyl ether to obtain 1.13 g white solid. Overall yield: 66%. Mp = 263.1~264.4 °C. [α]<sub>D</sub> = +65.0° (*c* 0.1, DMSO). IR (KBr):

3184  $\text{cm}^{-1}$ , 3050  $\text{cm}^{-1}$ , 2966  $\text{cm}^{-1}$ , 2896  $\text{cm}^{-1}$ , 1671  $\text{cm}^{-1}$ , 1463  $\text{cm}^{-1}$ , 1342  $\text{cm}^{-1}$ , 861  $\text{cm}^{-1}$ .  $^1\text{H}$  NMR (600 MHz,  $\text{DMSO-}d_6$ ):  $\delta$  (ppm) 8.12 (s, 1H), 7.99 (s, 1H), 3.88 (q,  $J = 7.0$  Hz, 1H), 3.68 (s, 1H), 2.19 – 2.11 (m, 1H), 1.27 (d,  $J = 7.0$  Hz, 3H), 0.94 (d,  $J = 7.1$  Hz, 3H), 0.84 (d,  $J = 6.8$  Hz, 3H).  $^{13}\text{C}$  NMR (151 MHz,  $\text{DMSO-}d_6$ ):  $\delta$  (ppm) 169.17, 167.08, 59.84, 50.13, 31.52, 20.54, 18.95, 17.32. HRMS (ESI): calcd for  $[\text{C}_8\text{H}_{15}\text{N}_2\text{O}_2]^+$ : 171.1123, found: 171.1127.

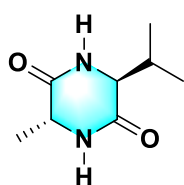

**17:** Purification via washing by ethyl ether to obtain 1.06 g white solid. Overall yield: 62%.  $\text{Mp} = 278.5\text{--}279.3$   $^\circ\text{C}$ .  $[\alpha]_{\text{D}} = +15.0^\circ$  ( $c$  0.1,  $\text{DMSO}$ ). IR (KBr): 3184  $\text{cm}^{-1}$ , 3048  $\text{cm}^{-1}$ , 2964  $\text{cm}^{-1}$ , 2886  $\text{cm}^{-1}$ , 1671  $\text{cm}^{-1}$ , 1451  $\text{cm}^{-1}$ , 1342  $\text{cm}^{-1}$ , 861  $\text{cm}^{-1}$ .  $^1\text{H}$  NMR (600 MHz,  $\text{DMSO-}d_6$ ):  $\delta$  (ppm) 8.13 (s, 1H), 8.10 (s, 1H), 3.91 (q,  $J = 6.9$  Hz, 1H), 3.54 (t,  $J = 3.5$  Hz, 1H), 2.15 – 2.07 (m, 1H), 1.24 (d,  $J = 6.9$  Hz, 3H), 0.93 (d,  $J = 7.0$  Hz, 3H), 0.85 (d,  $J = 6.8$  Hz, 3H).  $^{13}\text{C}$  NMR (151 MHz,  $\text{DMSO-}d_6$ ):  $\delta$  (ppm) 169.39, 167.95, 60.73, 49.48, 32.66, 19.10, 19.02, 17.69. HRMS (ESI): calcd for  $[\text{C}_8\text{H}_{15}\text{N}_2\text{O}_2]^+$ : 171.1123, found: 171.1128.

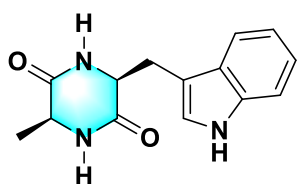

**18:** Purification via washing by ethyl ether to obtain 1.57 g white solid. Overall yield: 61%.  $\text{Mp} = 298.8\text{--}300.1$   $^\circ\text{C}$ .  $[\alpha]_{\text{D}} = -12.0^\circ$  ( $c$  0.1,  $\text{DMSO}$ ). IR (KBr): 3414  $\text{cm}^{-1}$ , 3188  $\text{cm}^{-1}$ , 3054  $\text{cm}^{-1}$ , 1661  $\text{cm}^{-1}$ , 1455  $\text{cm}^{-1}$ , 1327  $\text{cm}^{-1}$ , 838  $\text{cm}^{-1}$ , 742  $\text{cm}^{-1}$ .  $^1\text{H}$  NMR (600 MHz,  $\text{DMSO-}d_6$ ):  $\delta$  (ppm) 10.89 (s, 1H), 8.01 (s, 1H), 7.90 (s, 1H), 7.56 (d,  $J = 7.9$  Hz, 1H), 7.31 (d,  $J = 8.1$  Hz, 1H), 7.04 (d,  $J = 2.3$  Hz, 1H), 7.02 (d,  $J = 7.9$  Hz, 1H), 6.94 (t,  $J = 7.4$  Hz, 1H), 4.11 (s, 1H), 3.59 (q,  $J = 7.1$  Hz, 1H), 3.24 (dd,  $J = 14.4, 4.1$  Hz, 1H), 3.01 (dd,  $J = 14.4, 4.5$  Hz, 1H), 0.42 (d,  $J = 7.0$  Hz, 3H).  $^{13}\text{C}$  NMR (151 MHz,  $\text{DMSO-}d_6$ ):  $\delta$  (ppm) 168.21, 167.24, 136.27, 128.27, 125.03, 121.27, 119.44, 118.84, 111.56, 108.98, 55.87, 50.26, 29.32, 20.01. HRMS (ESI): calcd for  $[\text{C}_{14}\text{H}_{16}\text{N}_3\text{O}_2]^+$ : 258.1237, found: 258.1234.

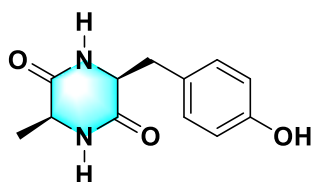

**19:** Purification via washing by ethyl ether to obtain 1.48 g white solid. Overall yield: 63%.  $\text{Mp} = 294.8\text{--}296.4$   $^\circ\text{C}$ .  $[\alpha]_{\text{D}} = -13.0^\circ$  ( $c$  0.1,  $\text{DMSO}$ ). IR (KBr): 3309  $\text{cm}^{-1}$ , 3202  $\text{cm}^{-1}$ , 3048  $\text{cm}^{-1}$ , 2873  $\text{cm}^{-1}$ , 1673  $\text{cm}^{-1}$ , 1519  $\text{cm}^{-1}$ , 1478  $\text{cm}^{-1}$ , 1330  $\text{cm}^{-1}$ , 1241  $\text{cm}^{-1}$ , 1110  $\text{cm}^{-1}$ , 838  $\text{cm}^{-1}$ .  $^1\text{H}$  NMR (600 MHz,  $\text{DMSO-}d_6$ ):  $\delta$  (ppm) 9.20 (s, 1H), 8.03 (s, 1H), 7.98 (s, 1H), 6.93 (d,  $J = 8.0$  Hz, 2H), 6.65 (d,  $J = 8.1$  Hz, 2H), 4.07 (s, 1H), 3.62 (d,  $J = 6.7$  Hz, 1H), 3.01 (dd,  $J = 13.5, 2.9$  Hz, 1H), 2.73 (dd,  $J = 13.6, 4.4$  Hz, 1H), 0.53 (d,  $J = 6.9$  Hz, 3H).  $^{13}\text{C}$  NMR (151 MHz,  $\text{DMSO-}d_6$ ):  $\delta$  (ppm) 168.15, 166.43, 156.62, 131.77, 126.44, 115.30, 56.04, 50.23, 38.06, 20.28. HRMS (ESI): calcd for  $[\text{C}_{12}\text{H}_{15}\text{N}_2\text{O}_3]^+$ : 235.1077, found: 235.1076.

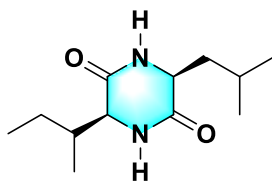

**20:** Purification via washing by ethyl ether to obtain 1.43 g white solid.

Overall yield: 63%. Mp = 294.9~296.7 °C.  $[\alpha]_D = -58.0^\circ$  (*c* 0.1, DMSO).

IR (KBr): 3451  $\text{cm}^{-1}$ , 3186  $\text{cm}^{-1}$ , 3097  $\text{cm}^{-1}$ , 3054  $\text{cm}^{-1}$ , 2964  $\text{cm}^{-1}$ , 2875  $\text{cm}^{-1}$ , 1665  $\text{cm}^{-1}$ , 1453  $\text{cm}^{-1}$ , 1325  $\text{cm}^{-1}$ , 1142  $\text{cm}^{-1}$ , 851  $\text{cm}^{-1}$ , 766  $\text{cm}^{-1}$ ,

684  $\text{cm}^{-1}$ .  $^1\text{H}$  NMR (600 MHz, DMSO-*d*<sub>6</sub>):  $\delta$  (ppm) 8.17 (s, 1H), 8.04 (s, 1H), 3.82 – 3.72 (m, 1H), 3.69 (s, 1H), 2.01 – 1.73 (m, 2H), 1.66 – 1.56 (m, 1H), 1.51 – 1.32 (m, 2H), 1.25 – 1.08 (m, 1H), 0.91 (d, *J* = 7.0 Hz, 3H), 0.88 (d, *J* = 6.6 Hz, 3H), 0.87 – 0.78 (m, 6H).  $^{13}\text{C}$  NMR (151 MHz, DMSO-*d*<sub>6</sub>):  $\delta$  (ppm) 168.84, 167.32, 59.27, 52.79, 44.13, 38.74, 24.79, 24.02, 23.57, 22.22, 15.63, 12.26. HRMS (ESI): calcd for  $[\text{C}_{12}\text{H}_{23}\text{N}_2\text{O}_2]^+$ : 227.1755, found: 227.1757.

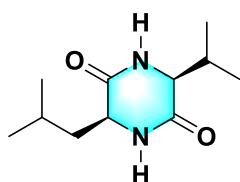

**21:** Purification via washing by ethyl ether to obtain 1.73 g white solid.

Overall yield: 81%. Mp = 284.3~286.5 °C.  $[\alpha]_D = -63.7^\circ$  (*c* 0.1, DMSO).

IR (KBr): 3192  $\text{cm}^{-1}$ , 3056  $\text{cm}^{-1}$ , 2962  $\text{cm}^{-1}$ , 2882  $\text{cm}^{-1}$ , 1669  $\text{cm}^{-1}$ , 1451  $\text{cm}^{-1}$ , 849  $\text{cm}^{-1}$ .  $^1\text{H}$  NMR (600 MHz, DMSO-*d*<sub>6</sub>):  $\delta$  (ppm) 8.18 (s, 1H),

8.05 (s, 1H), 3.76 (s, 1H), 3.62 (s, 1H), 2.17 – 2.04 (m, 1H), 1.89 – 1.78 (m, 1H), 1.67 – 1.55 (m, 1H), 1.50 – 1.36 (m, 1H), 0.94 (d, *J* = 6.9 Hz, 3H), 0.88 (d, *J* = 6.6 Hz, 3H), 0.87 – 0.77 (m, 6H).  $^{13}\text{C}$  NMR (151 MHz, DMSO-*d*<sub>6</sub>):  $\delta$  (ppm) 168.92, 167.32, 59.99, 52.84, 44.40, 31.91, 24.02, 23.56, 22.22, 19.23, 17.81. HRMS (ESI): calcd for  $[\text{C}_{11}\text{H}_{21}\text{N}_2\text{O}_2]^+$ : 213.1592, found: 213.1597.

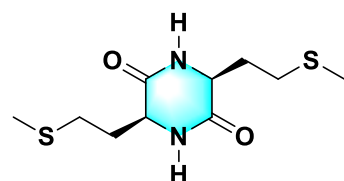

**22:** Purification via washing by ethyl ether to obtain 1.80 g white

solid. Overall yield: 69%. Mp = 230.4~231.6 °C.  $[\alpha]_D = -84.0^\circ$  (*c*

0.1, DMSO). IR (KBr): 3315  $\text{cm}^{-1}$ , 3194  $\text{cm}^{-1}$ , 3093  $\text{cm}^{-1}$ , 3048  $\text{cm}^{-1}$ , 2966  $\text{cm}^{-1}$ , 2915  $\text{cm}^{-1}$ , 2865  $\text{cm}^{-1}$ , 1677  $\text{cm}^{-1}$ , 1443  $\text{cm}^{-1}$ ,

1336  $\text{cm}^{-1}$ , 1290  $\text{cm}^{-1}$ , 1108  $\text{cm}^{-1}$ , 960  $\text{cm}^{-1}$ , 818  $\text{cm}^{-1}$ , 676  $\text{cm}^{-1}$ , 635  $\text{cm}^{-1}$ .  $^1\text{H}$  NMR (600 MHz, DMSO-*d*<sub>6</sub>):  $\delta$  (ppm) 8.25 (s, 2H), 3.96 (s, 2H), 2.61 – 2.51 (m, 4H), 2.04 (s, 6H), 2.00 – 1.93 (m, 2H), 1.93 – 1.83 (m, 2H).  $^{13}\text{C}$  NMR (151 MHz, DMSO-*d*<sub>6</sub>):  $\delta$  (ppm) 168.27, 53.44, 32.81, 29.19, 14.90. HRMS (ESI): calcd for  $[\text{C}_{10}\text{H}_{19}\text{N}_2\text{O}_2\text{S}_2]^+$ : 263.0883, found: 263.0888.

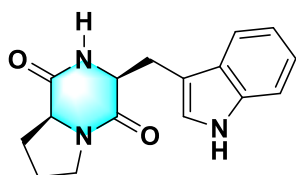

**23:** Purification via washing by ethyl ether to obtain 1.82 g pale

yellow solid. Overall yield: 64%. Mp = 168.7~170.1 °C.  $[\alpha]_D =$

-124.0° (*c* 0.1, DMSO). IR (KBr): 3287  $\text{cm}^{-1}$ , 3052  $\text{cm}^{-1}$ , 2984  $\text{cm}^{-1}$ , 2943  $\text{cm}^{-1}$ , 2871  $\text{cm}^{-1}$ , 1675  $\text{cm}^{-1}$ , 1650  $\text{cm}^{-1}$ , 1428  $\text{cm}^{-1}$ , 1241  $\text{cm}^{-1}$ ,

1108  $\text{cm}^{-1}$ , 742  $\text{cm}^{-1}$ , 692  $\text{cm}^{-1}$ , 637  $\text{cm}^{-1}$ , 563  $\text{cm}^{-1}$ .  $^1\text{H}$  NMR (600 MHz, DMSO-*d*<sub>6</sub>):  $\delta$  (ppm) 10.85 (s, 1H), 7.73 (s, 1H), 7.57 (d, *J* = 7.7 Hz, 1H), 7.32 (d, *J* = 7.9 Hz, 1H), 7.18 (s, 1H), 7.05 (t, *J* = 7.3 Hz, 1H), 6.96 (t, *J* = 7.3 Hz, 1H), 4.30 (s, 1H), 4.06 (t, *J* = 8.0 Hz, 1H), 3.38 (dd, *J* = 18.9,

8.2 Hz, 1H), 3.24 (d,  $J = 11.0$  Hz, 2H), 3.07 (dd,  $J = 14.8, 5.5$  Hz, 1H), 2.03 – 1.87 (m, 1H), 1.67 (dd,  $J = 18.1, 8.7$  Hz, 1H), 1.65 – 1.54 (m, 1H), 1.44 – 1.33 (m, 1H).  $^{13}\text{C}$  NMR (151 MHz, DMSO- $d_6$ ):  $\delta$  (ppm) 169.48, 165.98, 136.45, 127.83, 124.86, 121.35, 119.12, 118.70, 111.70, 109.77, 58.90, 55.71, 45.07, 28.15, 26.29, 22.35. HRMS (ESI): calcd for  $[\text{C}_{16}\text{H}_{18}\text{N}_3\text{O}_2]^+$ : 284.1394, found: 284.1392.

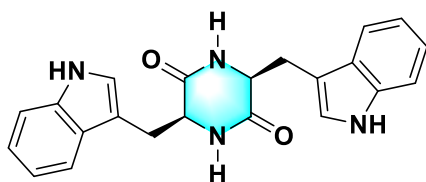

**24:** Purification via recrystallization to obtain 2.57 g white solid. Overall yield: 69%. Mp = 274.7~276.1 °C.  $[\alpha]_{\text{D}} = -101.7^\circ$  ( $c$  0.1, DMSO). IR (KBr): 3420  $\text{cm}^{-1}$ , 3361  $\text{cm}^{-1}$ , 3178  $\text{cm}^{-1}$ , 3052  $\text{cm}^{-1}$ , 2966  $\text{cm}^{-1}$ , 2908  $\text{cm}^{-1}$ , 2878

$\text{cm}^{-1}$ , 1675  $\text{cm}^{-1}$ , 1459  $\text{cm}^{-1}$ , 1336  $\text{cm}^{-1}$ , 1233  $\text{cm}^{-1}$ , 1091  $\text{cm}^{-1}$ , 1013  $\text{cm}^{-1}$ , 923  $\text{cm}^{-1}$ , 849  $\text{cm}^{-1}$ , 748  $\text{cm}^{-1}$ , 592  $\text{cm}^{-1}$ .  $^1\text{H}$  NMR (600 MHz, DMSO- $d_6$ ):  $\delta$  (ppm) 10.83 (s, 2H), 7.69 (s, 2H), 7.35 (d,  $J = 7.8$  Hz, 2H), 7.28 (d,  $J = 8.0$  Hz, 2H), 7.04 (t,  $J = 7.4$  Hz, 2H), 6.95 (t,  $J = 7.4$  Hz, 2H), 6.60 (s, 2H), 3.86 (s, 2H), 2.70 (dd,  $J = 14.2, 3.7$  Hz, 2H), 2.18 (dd,  $J = 14.2, 6.5$  Hz, 2H).  $^{13}\text{C}$  NMR (151 MHz, DMSO- $d_6$ ):  $\delta$  (ppm) 167.20, 136.53, 127.83, 124.87, 121.26, 119.01, 118.82, 111.72, 109.24, 55.75, 30.45. HRMS (ESI): calcd for  $[\text{C}_{22}\text{H}_{21}\text{N}_4\text{O}_2]^+$ : 373.1659, found: 373.1692.

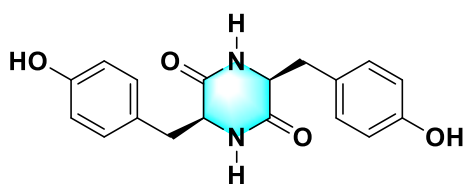

**25:** Purification via washing by ethyl ether to obtain 2.45 g white solid. Overall yield: 75%. Mp = 292.6~293.4 °C.  $[\alpha]_{\text{D}} = -121.0^\circ$  ( $c$  0.1, DMSO). IR (KBr): 3439  $\text{cm}^{-1}$ , 3237  $\text{cm}^{-1}$ , 3056  $\text{cm}^{-1}$ , 1673  $\text{cm}^{-1}$ ,

1611  $\text{cm}^{-1}$ , 1515  $\text{cm}^{-1}$ , 1463  $\text{cm}^{-1}$ , 1342  $\text{cm}^{-1}$ , 1243  $\text{cm}^{-1}$ , 830  $\text{cm}^{-1}$ , 772  $\text{cm}^{-1}$ .  $^1\text{H}$  NMR (600 MHz, DMSO- $d_6$ /CD $_3$ CN- $d_3$ , v/v = 1/9):  $\delta$  (ppm) 8.85 (s, 2H), 7.07 (s, 2H), 6.90 (d,  $J = 8.2$  Hz, 4H), 6.74 (d,  $J = 8.3$  Hz, 4H), 3.89 (s, 2H), 2.66 (dd,  $J = 13.7, 4.1$  Hz, 2H), 2.12 (dd,  $J = 13.6, 7.1$  Hz, 2H).  $^{13}\text{C}$  NMR (151 MHz, DMSO- $d_6$ ):  $\delta$  (ppm) 166.73, 156.54, 131.22, 127.01, 115.50, 56.21, 39.27. HRMS (ESI): calcd for  $[\text{C}_{18}\text{H}_{19}\text{N}_2\text{O}_4]^+$ : 327.1323, found: 327.1338.

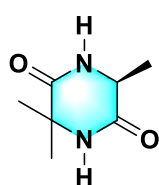

**26:** Purification via washing by ethyl ether to obtain 1.21 white solid. Overall yield: 77%. Mp = 307.8~310.4 °C.  $[\alpha]_{\text{D}} = -45.6^\circ$  ( $c$  0.1, DMSO). IR (KBr): 3190  $\text{cm}^{-1}$ , 3042  $\text{cm}^{-1}$ , 2982  $\text{cm}^{-1}$ , 2894  $\text{cm}^{-1}$ , 1681  $\text{cm}^{-1}$ , 1441  $\text{cm}^{-1}$ , 1309  $\text{cm}^{-1}$ , 1198  $\text{cm}^{-1}$ , 1167  $\text{cm}^{-1}$ , 844  $\text{cm}^{-1}$ , 684  $\text{cm}^{-1}$ .  $^1\text{H}$  NMR (600 MHz, DMSO- $d_6$ ):  $\delta$  (ppm)

8.16 (s, 1H), 8.03 (s, 1H), 3.94 (q,  $J = 6.9$  Hz, 1H), 1.29 (d,  $J = 3.7$  Hz, 6H), 1.26 (d,  $J = 6.9$  Hz, 3H).  $^{13}\text{C}$  NMR (151 MHz, DMSO- $d_6$ ):  $\delta$  (ppm) 171.27, 168.71, 55.50, 50.38, 27.90, 19.61. HRMS (ESI): calcd for  $[\text{C}_7\text{H}_{13}\text{N}_2\text{O}_2]^+$ : 157.0972, found: 157.0972.

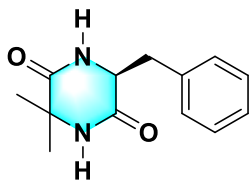

**27:** Purification via washing by ethyl ether to obtain 1.93 g white solid.

Overall yield: 83%. Mp = 276.5~278.1 °C.  $[\alpha]_D = +19.0^\circ$  (*c* 0.1, DMSO).

IR (KBr): 3188  $\text{cm}^{-1}$ , 3044  $\text{cm}^{-1}$ , 2980  $\text{cm}^{-1}$ , 2902  $\text{cm}^{-1}$ , 1673  $\text{cm}^{-1}$ , 1490  $\text{cm}^{-1}$ , 1451  $\text{cm}^{-1}$ , 1309  $\text{cm}^{-1}$ , 1198  $\text{cm}^{-1}$ , 863  $\text{cm}^{-1}$ , 768  $\text{cm}^{-1}$ , 707  $\text{cm}^{-1}$ .  $^1\text{H}$

NMR (600 MHz, DMSO- $d_6$ ):  $\delta$  (ppm) 8.08 (s, 1H), 8.04 (s, 1H), 7.26 (t,  $J = 7.3$  Hz, 2H), 7.21 (t,  $J = 7.3$  Hz, 1H), 7.16 (d, 2H), 4.23 – 4.19 (m, 1H), 3.15 (dd,  $J = 13.4, 3.5$  Hz, 1H), 2.85 (dd,  $J = 13.5, 4.9$  Hz, 1H), 1.16 (s, 3H), 0.47 (s, 3H).  $^{13}\text{C}$  NMR (151 MHz, DMSO- $d_6$ ):  $\delta$  (ppm) 170.59, 165.77, 136.52, 130.87, 128.45, 127.11, 56.11, 55.17, 38.76, 28.75, 28.12. HRMS (ESI): calcd for  $[\text{C}_{13}\text{H}_{17}\text{N}_2\text{O}_2]^+$ : 233.1279, found: 233.1284.

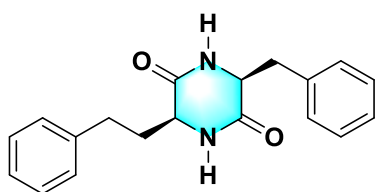

**28:** Purification via washing by ethyl ether to obtain 2.53 g white solid. Overall yield: 82%. Mp = 293.1~294 °C.  $[\alpha]_D = -51.0^\circ$  (*c* 0.1, DMSO). IR (KBr): 3194  $\text{cm}^{-1}$ , 3048  $\text{cm}^{-1}$ , 2964  $\text{cm}^{-1}$ , 2892  $\text{cm}^{-1}$ , 1677  $\text{cm}^{-1}$ , 1461  $\text{cm}^{-1}$ , 1336  $\text{cm}^{-1}$ , 1095  $\text{cm}^{-1}$ ,

846  $\text{cm}^{-1}$ , 758  $\text{cm}^{-1}$ , 705  $\text{cm}^{-1}$ .  $^1\text{H}$  NMR (600 MHz, DMSO- $d_6$ ):

$\delta$  (ppm) 8.22 (s, 1H), 8.17 (s, 1H), 7.24 (dd,  $J = 13.6, 7.2$  Hz, 4H), 7.18 (d,  $J = 7.3$  Hz, 2H), 7.13 (t,  $J = 7.3$  Hz, 1H), 7.09 (t,  $J = 7.2$  Hz, 1H), 6.97 (d,  $J = 7.3$  Hz, 2H), 4.23 (s, 1H), 3.65 (s, 1H), 3.18 (dd,  $J = 13.4, 3.3$  Hz, 1H), 2.86 (dd,  $J = 13.4, 4.8$  Hz, 1H), 2.17 – 1.85 (m, 2H), 1.45 – 1.22 (m, 1H), 1.13 – 0.91 (m, 1H).  $^{13}\text{C}$  NMR (151 MHz, DMSO- $d_6$ ):  $\delta$  (ppm) 167.21, 166.68, 141.88, 136.50, 130.91, 128.63, 128.60, 128.44, 127.17, 126.10, 55.76, 54.00, 38.49, 35.45, 30.01. HRMS (ESI): calcd for  $[\text{C}_{19}\text{H}_{21}\text{N}_2\text{O}_2]^+$ : 309.1592, found: 309.1598.

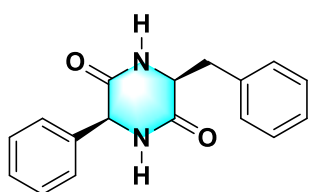

**29:** Purification via washing by ethyl ether to obtain 2.14 g white solid. Overall yield: 76%. Mp = 247.3~248.1 °C.  $[\alpha]_D = -23.0^\circ$  (*c* 0.1, DMSO). IR (KBr): 3223  $\text{cm}^{-1}$ , 3122  $\text{cm}^{-1}$ , 2958  $\text{cm}^{-1}$ , 2855  $\text{cm}^{-1}$ ,

1671  $\text{cm}^{-1}$ , 1430  $\text{cm}^{-1}$ , 1336  $\text{cm}^{-1}$ , 1274  $\text{cm}^{-1}$ , 1091  $\text{cm}^{-1}$ , 797  $\text{cm}^{-1}$ , 705  $\text{cm}^{-1}$ .  $^1\text{H}$  NMR (600 MHz, DMSO- $d_6$ ):  $\delta$  (ppm) 8.43 (s, 1H),

8.25 (s, 1H), 7.41 – 7.23 (m, 8H), 7.21 (d,  $J = 7.1$  Hz, 2H), 4.36 (s, 1H), 4.24 (s, 1H), 3.22 (dd,  $J = 13.6, 3.8$  Hz, 1H), 2.95 (dd,  $J = 13.6, 4.9$  Hz, 1H).  $^{13}\text{C}$  NMR (151 MHz, DMSO- $d_6$ ):  $\delta$  (ppm) 167.28, 166.63, 139.46, 136.58, 130.69, 128.81, 128.54, 128.30, 127.75, 127.16, 58.84, 55.50, 38.39. HRMS (ESI): calcd for  $[\text{C}_{17}\text{H}_{17}\text{N}_2\text{O}_2]^+$ : 281.1279, found: 281.1281.

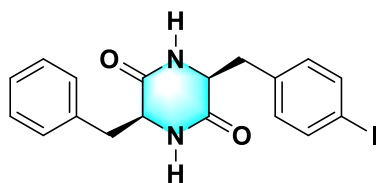

**30:** Purification via washing by ethyl ether to obtain 3.04 g white solid. Overall yield: 72%. Mp = 296.8~298.9 °C.  $[\alpha]_D = -101.0^\circ$  (*c* 0.1, DMSO). IR (KBr): 3459  $\text{cm}^{-1}$ , 3319  $\text{cm}^{-1}$ , 3204

cm<sup>-1</sup>, 3085 cm<sup>-1</sup>, 3058 cm<sup>-1</sup>, 2968 cm<sup>-1</sup>, 2929 cm<sup>-1</sup>, 2888 cm<sup>-1</sup>, 1671 cm<sup>-1</sup>, 1459 cm<sup>-1</sup>, 1336 cm<sup>-1</sup>, 1101 cm<sup>-1</sup>, 1013 cm<sup>-1</sup>, 807 cm<sup>-1</sup>, 756 cm<sup>-1</sup>, 696 cm<sup>-1</sup>. <sup>1</sup>H NMR (600 MHz, DMSO-*d*<sub>6</sub>): δ (ppm) 8.04 (s, 1H), 7.98 (s, 1H), 7.60 (d, *J* = 7.5 Hz, 2H), 7.28 (t, *J* = 6.8 Hz, 2H), 7.23 (d, *J* = 6.8 Hz, 1H), 7.06 (d, *J* = 6.9 Hz, 2H), 6.80 (d, *J* = 7.5 Hz, 2H), 4.06 (s, 1H), 3.93 (s, 1H), 2.66 (dd, *J* = 13.3, 3.9 Hz, 1H), 2.53 (dd, *J* = 4.7 Hz, 1H), 2.45 (dd, *J* = 13.5, 4.0 Hz, 1H), 2.08 (dd, *J* = 13.3, 6.1 Hz, 1H). <sup>13</sup>C NMR (151 MHz, DMSO-*d*<sub>6</sub>): δ (ppm) 166.68, 166.56, 137.34, 136.85, 132.60, 130.38, 128.66, 126.98, 93.00, 55.71, 55.59, 39.37, 39.22. HRMS (ESI): calcd for [C<sub>18</sub>H<sub>18</sub>N<sub>2</sub>O<sub>2</sub>]<sup>+</sup>: 421.0408, found: 421.0412.

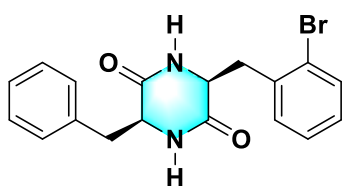

**31:** Purification via washing by ethyl ether to obtain 2.92 g white solid. Overall yield: 78%. Mp = 278.8~280.2 °C. [ $\alpha$ ]<sub>D</sub> = -192.0° (*c* 0.1, DMSO). IR (KBr): 3445 cm<sup>-1</sup>, 3330 cm<sup>-1</sup>, 3184 cm<sup>-1</sup>, 3056 cm<sup>-1</sup>, 2974 cm<sup>-1</sup>, 2886 cm<sup>-1</sup>, 1677 cm<sup>-1</sup>, 1461 cm<sup>-1</sup>, 1334 cm<sup>-1</sup>, 1101 cm<sup>-1</sup>, 1023 cm<sup>-1</sup>, 846 cm<sup>-1</sup>, 818 cm<sup>-1</sup>, 750 cm<sup>-1</sup>, 705 cm<sup>-1</sup>, 583 cm<sup>-1</sup>. <sup>1</sup>H NMR (600 MHz, DMSO-*d*<sub>6</sub>): δ (ppm) 8.25 (s, 1H), 7.84 (s, 1H), 7.53 (d, *J* = 7.8 Hz, 1H), 7.37 (t, *J* = 7.3 Hz, 2H), 7.25 (t, *J* = 7.3 Hz, 2H), 7.22 (d, *J* = 7.3 Hz, 2H), 7.14 (t, *J* = 7.4 Hz, 1H), 6.83 (d, *J* = 7.2 Hz, 1H), 4.17 (s, 1H), 3.85 (s, 1H), 2.99 (dd, *J* = 13.3, 3.8 Hz, 1H), 2.84 (dd, *J* = 13.3, 4.4 Hz, 1H), 2.61 (dd, *J* = 13.5, 4.5 Hz, 1H), 1.66 (dd, *J* = 13.4, 8.8 Hz, 1H). <sup>13</sup>C NMR (151 MHz, DMSO-*d*<sub>6</sub>): δ (ppm) 166.58, 166.54, 136.78, 136.35, 132.98, 132.79, 130.87, 129.16, 128.83, 127.95, 127.30, 124.56, 56.08, 53.92, 41.18, 39.22. HRMS (ESI): calcd for [C<sub>18</sub>H<sub>18</sub>N<sub>2</sub>O<sub>2</sub>Br]<sup>+</sup>: 373.0547, found: 373.0549.

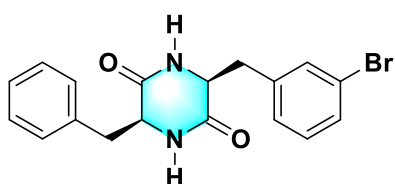

**32:** Purification via washing by ethyl ether to obtain 2.74 g white solid. Overall yield: 74%. Mp = 279.4~280.5 °C. [ $\alpha$ ]<sub>D</sub> = -80.0° (*c* 0.1, DMSO). IR (KBr): 3451 cm<sup>-1</sup>, 3326 cm<sup>-1</sup>, 3192 cm<sup>-1</sup>, 3089 cm<sup>-1</sup>, 3050 cm<sup>-1</sup>, 2970 cm<sup>-1</sup>, 2921 cm<sup>-1</sup>, 2884 cm<sup>-1</sup>, 1663 cm<sup>-1</sup>, 1461 cm<sup>-1</sup>, 1340 cm<sup>-1</sup>, 1206 cm<sup>-1</sup>, 1095 cm<sup>-1</sup>, 830 cm<sup>-1</sup>, 768 cm<sup>-1</sup>, 700 cm<sup>-1</sup>. <sup>1</sup>H NMR (600 MHz, DMSO-*d*<sub>6</sub>): δ (ppm) 8.05 (s, 2H), 7.41 (d, *J* = 8.0 Hz, 1H), 7.28 (t, *J* = 7.4 Hz, 2H), 7.25 – 7.15 (m, 3H), 7.06 (d, *J* = 7.3 Hz, 2H), 7.02 (d, *J* = 7.6 Hz, 1H), 4.03 (s, 1H), 3.99 (s, 1H), 2.64 (dd, *J* = 13.6, 4.8 Hz, 1H), 2.52 (dd, 1H), 2.42 (dd, *J* = 13.6, 5.6 Hz, 1H), 2.19 (dd, *J* = 13.6, 6.1 Hz, 1H). <sup>13</sup>C NMR (151 MHz, DMSO-*d*<sub>6</sub>): δ (ppm) 166.71, 166.49, 139.88, 136.89, 132.92, 130.76, 130.39, 129.90, 129.38, 128.64, 127.05, 121.94, 55.81, 55.61, 40.51, 39.30. HRMS (ESI): calcd for [C<sub>18</sub>H<sub>18</sub>N<sub>2</sub>O<sub>2</sub>Br]<sup>+</sup>: 373.0547, found: 373.0550.

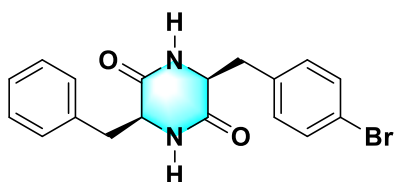

**33:** Purification via washing by ethyl ether to obtain 2.64 g

white solid. Overall yield: 71%. Mp = 283.9~284.5 °C.  $[\alpha]_D = -101.7^\circ$  (c 0.1, DMSO). IR (KBr): 3192  $\text{cm}^{-1}$ , 3085  $\text{cm}^{-1}$ , 3052  $\text{cm}^{-1}$ , 2966  $\text{cm}^{-1}$ , 2927  $\text{cm}^{-1}$ , 2873  $\text{cm}^{-1}$ , 1667  $\text{cm}^{-1}$ , 1459  $\text{cm}^{-1}$ , 1338  $\text{cm}^{-1}$ , 1204  $\text{cm}^{-1}$ , 1099  $\text{cm}^{-1}$ , 1015  $\text{cm}^{-1}$ , 816  $\text{cm}^{-1}$ , 760  $\text{cm}^{-1}$ , 700  $\text{cm}^{-1}$ .  $^1\text{H}$  NMR (600 MHz, DMSO- $d_6$ ):  $\delta$  (ppm) 8.04 (d,  $J = 1.6$  Hz, 1H), 7.98 (d,  $J = 1.8$  Hz, 1H), 7.43 (d,  $J = 8.3$  Hz, 2H), 7.28 (t,  $J = 7.4$  Hz, 2H), 7.22 (t,  $J = 7.3$  Hz, 1H), 7.06 (d,  $J = 7.1$  Hz, 2H), 6.94 (d,  $J = 8.3$  Hz, 2H), 4.07 (s, 1H), 3.94 (s, 1H), 2.67 (dd,  $J = 13.6, 4.9$  Hz, 1H), 2.55 (dd,  $J = 13.7, 5.3$  Hz, 1H), 2.47 (dd,  $J = 13.7, 5.0$  Hz, 1H), 2.09 (dd,  $J = 13.6, 6.4$  Hz, 1H).  $^{13}\text{C}$  NMR (151 MHz, DMSO- $d_6$ ):  $\delta$  (ppm) 166.69, 166.57, 136.84, 136.48, 132.39, 131.46, 130.39, 128.66, 126.98, 120.24, 55.73, 55.60, 39.34, 39.07. HRMS (ESI): calcd for  $[\text{C}_{18}\text{H}_{18}\text{N}_2\text{O}_2\text{Br}]^+$ : 373.0547, found: 373.0549.

## 2. Chiral HPLC traces

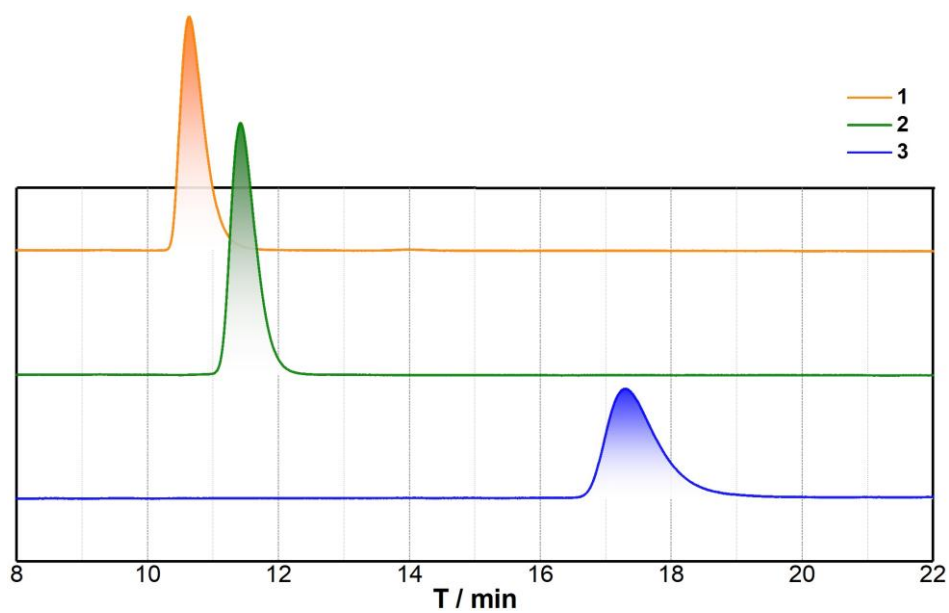

**Figure S4.** HPLC traces of synthesized **1**, **2**, and **3**. For HPLC, column: Chiralpak@ID (250 × 4.6 mm); mobile phase: 80:20 (v/v) *n*-hexane/2-propanol; flow rate: 1.0 mL/min; UV detection wavelength: 250 nm.

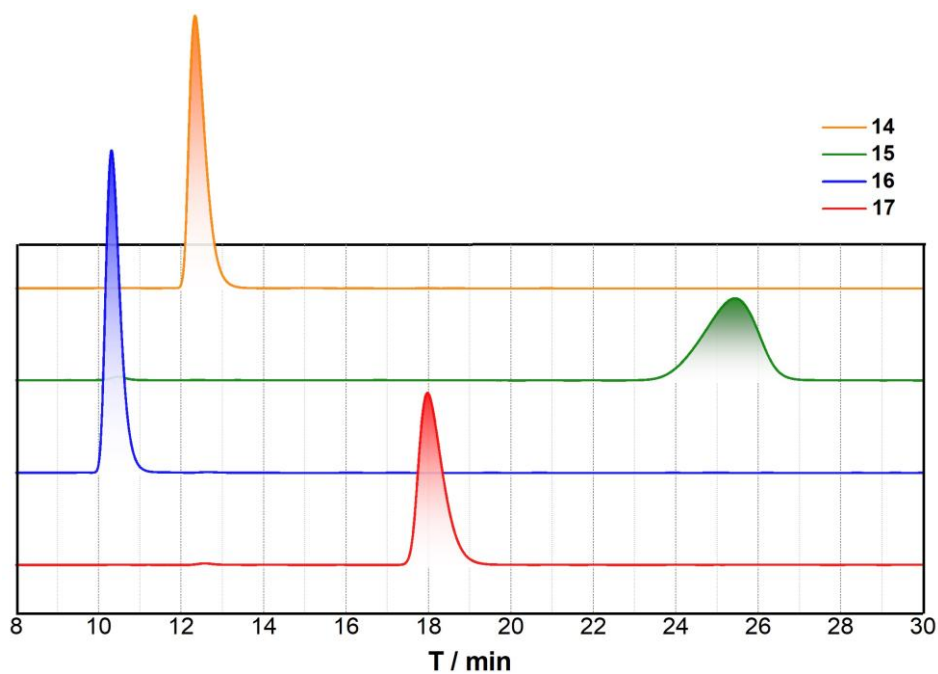

**Figure S5.** HPLC traces of synthesized **14**, **15**, **16**, and **17**. For HPLC, column: Chiralpak@ID (250 × 4.6 mm); mobile phase: 80:20 (v/v) *n*-hexane/2-propanol; flow rate: 1.0 mL/min; UV detection wavelength: 205 nm.

### 3. Absorption and CD spectra

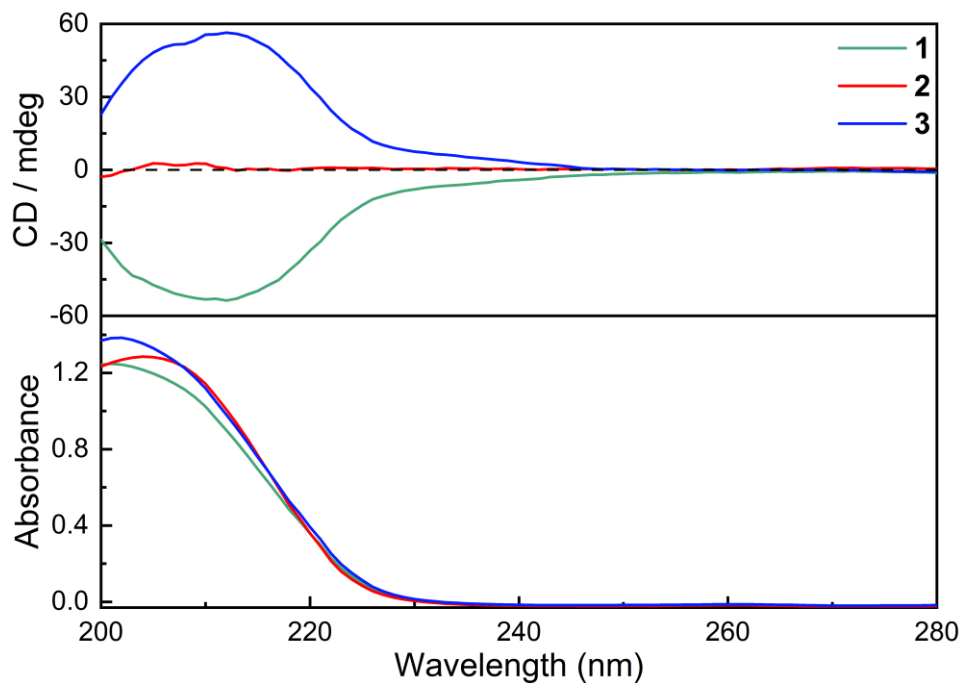

**Figure S6.** Absorption and CD spectra of **1**, **2**, and **3** in MeCN. The concentration is 50  $\mu\text{M}$ .

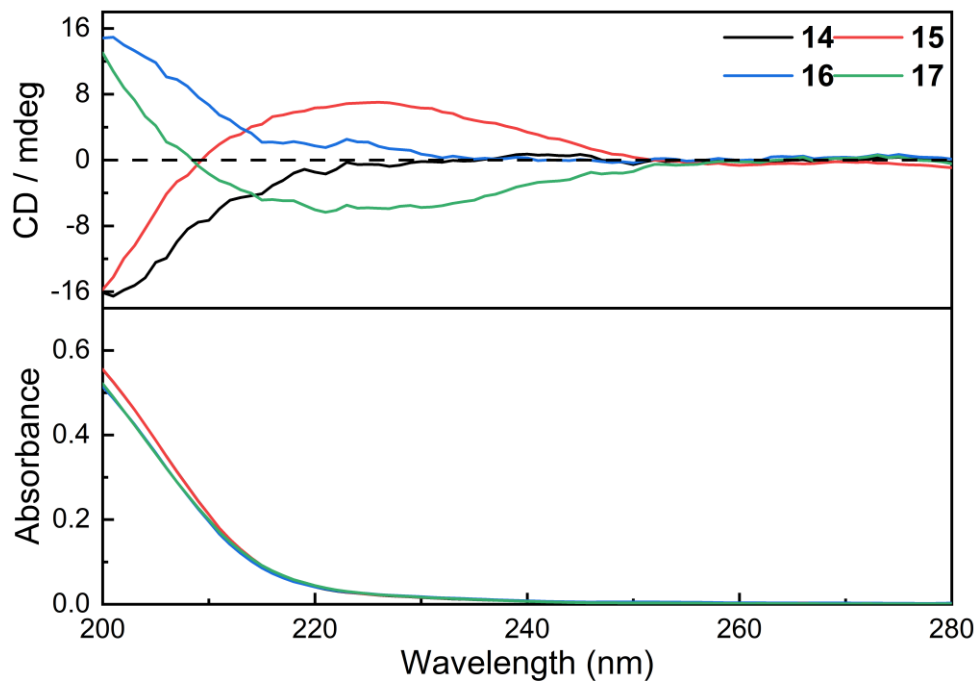

**Figure S7.** Absorption and CD spectra of **14**, **15**, **16**, and **17** in MeCN. The concentration is 50  $\mu\text{M}$ .

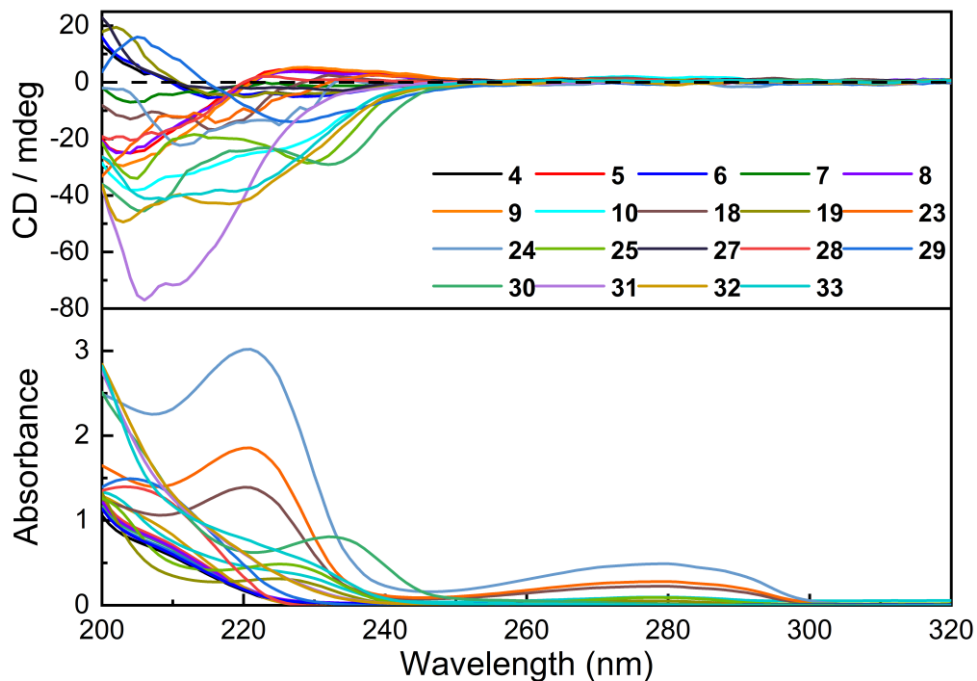

**Figure S8.** Absorption and CD spectra of **4**, **5**, **6**, **7**, **8**, **9**, **10**, **18**, **19**, **23**, **24**, **25**, **27**, **28**, **29**, **30**, **31**, **32**, and **33** in MeCN. The concentration is 50  $\mu\text{M}$ .

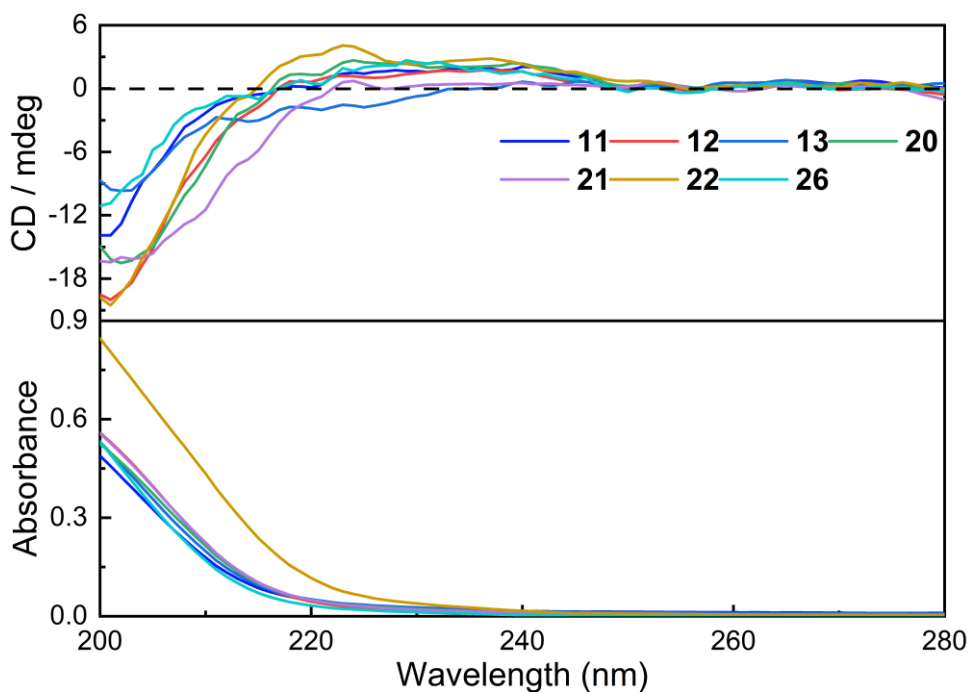

**Figure S9.** Absorption and CD spectra of **11**, **12**, **13**, **20**, **21**, **22**, and **26** in MeCN. The concentration is 50  $\mu\text{M}$ .

## 4. Crystal data

**Table S5.** Crystal data and structure refinement for **26**<sup>a</sup>

| Identification code                         | <b>26</b>                                                     |
|---------------------------------------------|---------------------------------------------------------------|
| Empirical formula                           | C <sub>7</sub> H <sub>12</sub> N <sub>2</sub> O <sub>2</sub>  |
| Formula weight                              | 156.19                                                        |
| Temperature/K                               | 100.15                                                        |
| Crystal system                              | triclinic                                                     |
| Space group                                 | P1                                                            |
| a/Å                                         | 6.1202(4)                                                     |
| b/Å                                         | 7.0189(5)                                                     |
| c/Å                                         | 9.3471(5)                                                     |
| α/°                                         | 100.217(6)                                                    |
| β/°                                         | 94.013(5)                                                     |
| γ/°                                         | 90.202(5)                                                     |
| Volume/Å <sup>3</sup>                       | 394.14(4)                                                     |
| Z                                           | 2                                                             |
| ρ <sub>calc</sub> /cm <sup>3</sup>          | 1.316                                                         |
| μ/mm <sup>-1</sup>                          | 0.807                                                         |
| F(000)                                      | 168.0                                                         |
| Crystal size/mm <sup>3</sup>                | 0.21 × 0.21 × 0.21                                            |
| Radiation                                   | CuKα (λ = 1.54184)                                            |
| 2θ range for data collection/°              | 9.64 to 153.034                                               |
| Index ranges                                | -7 ≤ h ≤ 5, -8 ≤ k ≤ 8, -11 ≤ l ≤ 11                          |
| Reflections collected                       | 3254                                                          |
| Independent reflections                     | 1875 [R <sub>int</sub> = 0.0429, R <sub>sigma</sub> = 0.0500] |
| Data/restraints/parameters                  | 1875/3/213                                                    |
| Goodness-of-fit on F <sup>2</sup>           | 1.107                                                         |
| Final R indexes [I ≥ 2σ (I)]                | R <sub>1</sub> = 0.0551, wR <sub>2</sub> = 0.1539             |
| Final R indexes [all data]                  | R <sub>1</sub> = 0.0589, wR <sub>2</sub> = 0.1576             |
| Largest diff. peak/hole / e Å <sup>-3</sup> | 0.45/-0.34                                                    |
| Flack parameter                             | -0.3(4)                                                       |
| CCDC                                        | 2491940                                                       |

<sup>a</sup> Grown in MeOH solution via slow evaporation.

**Table S6.** Crystal data and structure refinement for **27**<sup>a</sup>

| Identification code                         | <b>27</b>                                                     |
|---------------------------------------------|---------------------------------------------------------------|
| Empirical formula                           | C <sub>13</sub> H <sub>16</sub> N <sub>2</sub> O <sub>2</sub> |
| Formula weight                              | 232.28                                                        |
| Temperature/K                               | 100.01(13)                                                    |
| Crystal system                              | monoclinic                                                    |
| Space group                                 | P2 <sub>1</sub>                                               |
| a/Å                                         | 9.4693(4)                                                     |
| b/Å                                         | 6.1019(2)                                                     |
| c/Å                                         | 10.6945(4)                                                    |
| α/°                                         | 90                                                            |
| β/°                                         | 101.868(4)                                                    |
| γ/°                                         | 90                                                            |
| Volume/Å <sup>3</sup>                       | 604.73(4)                                                     |
| Z                                           | 2                                                             |
| ρ <sub>calc</sub> /cm <sup>3</sup>          | 1.276                                                         |
| μ/mm <sup>-1</sup>                          | 0.706                                                         |
| F(000)                                      | 248.0                                                         |
| Crystal size/mm <sup>3</sup>                | 0.23 × 0.20 × 0.19                                            |
| Radiation                                   | CuKα (λ = 1.54184)                                            |
| 2θ range for data collection/°              | 8.448 to 152.22                                               |
| Index ranges                                | -11 ≤ h ≤ 11, -7 ≤ k ≤ 7, -13 ≤ l ≤ 13                        |
| Reflections collected                       | 10559                                                         |
| Independent reflections                     | 2376 [R <sub>int</sub> = 0.0411, R <sub>sigma</sub> = 0.0304] |
| Data/restraints/parameters                  | 2376/1/156                                                    |
| Goodness-of-fit on F <sup>2</sup>           | 1.081                                                         |
| Final R indexes [I >= 2σ (I)]               | R <sub>1</sub> = 0.0325, wR <sub>2</sub> = 0.0835             |
| Final R indexes [all data]                  | R <sub>1</sub> = 0.0352, wR <sub>2</sub> = 0.0852             |
| Largest diff. peak/hole / e Å <sup>-3</sup> | 0.16/-0.24                                                    |
| Flack parameter                             | 0.03(13)                                                      |
| CCDC                                        | 2416472                                                       |

<sup>a</sup> Grown in DMSO solution via slow evaporation.

**Table S7.** Crystal data and structure refinement for **29**<sup>a</sup>

| Identification code                         | <b>29</b>                                                     |
|---------------------------------------------|---------------------------------------------------------------|
| Empirical formula                           | C <sub>34</sub> H <sub>32</sub> N <sub>4</sub> O <sub>4</sub> |
| Formula weight                              | 560.63                                                        |
| Temperature/K                               | 100.15                                                        |
| Crystal system                              | monoclinic                                                    |
| Space group                                 | P2 <sub>1</sub>                                               |
| a/Å                                         | 7.63700(10)                                                   |
| b/Å                                         | 15.9982(2)                                                    |
| c/Å                                         | 11.00670(10)                                                  |
| α/°                                         | 90                                                            |
| β/°                                         | 90                                                            |
| γ/°                                         | 90                                                            |
| Volume/Å <sup>3</sup>                       | 1344.78(3)                                                    |
| Z                                           | 2                                                             |
| ρ <sub>calc</sub> /cm <sup>3</sup>          | 1.385                                                         |
| μ/mm <sup>-1</sup>                          | 0.741                                                         |
| F(000)                                      | 592.0                                                         |
| Crystal size/mm <sup>3</sup>                | 0.22 × 0.21 × 0.20                                            |
| Radiation                                   | CuKα (λ = 1.54184)                                            |
| 2θ range for data collection/°              | 8.032 to 154.768                                              |
| Index ranges                                | -9 ≤ h ≤ 9, -20 ≤ k ≤ 20, -13 ≤ l ≤ 13                        |
| Reflections collected                       | 25538                                                         |
| Independent reflections                     | 5061 [R <sub>int</sub> = 0.0396, R <sub>sigma</sub> = 0.0272] |
| Data/restraints/parameters                  | 5061/1/393                                                    |
| Goodness-of-fit on F <sup>2</sup>           | 1.132                                                         |
| Final R indexes [I >= 2σ (I)]               | R <sub>1</sub> = 0.1056, wR <sub>2</sub> = 0.2702             |
| Final R indexes [all data]                  | R <sub>1</sub> = 0.1069, wR <sub>2</sub> = 0.2716             |
| Largest diff. peak/hole / e Å <sup>-3</sup> | 0.21/-0.06                                                    |
| Flack parameter                             | 0.16(10)                                                      |
| CCDC                                        | 2491941                                                       |

<sup>a</sup> Grown in MeOH/DMSO solution via slow evaporation.

## 5. $^1\text{H}$ NMR and $^{13}\text{C}$ NMR spectra

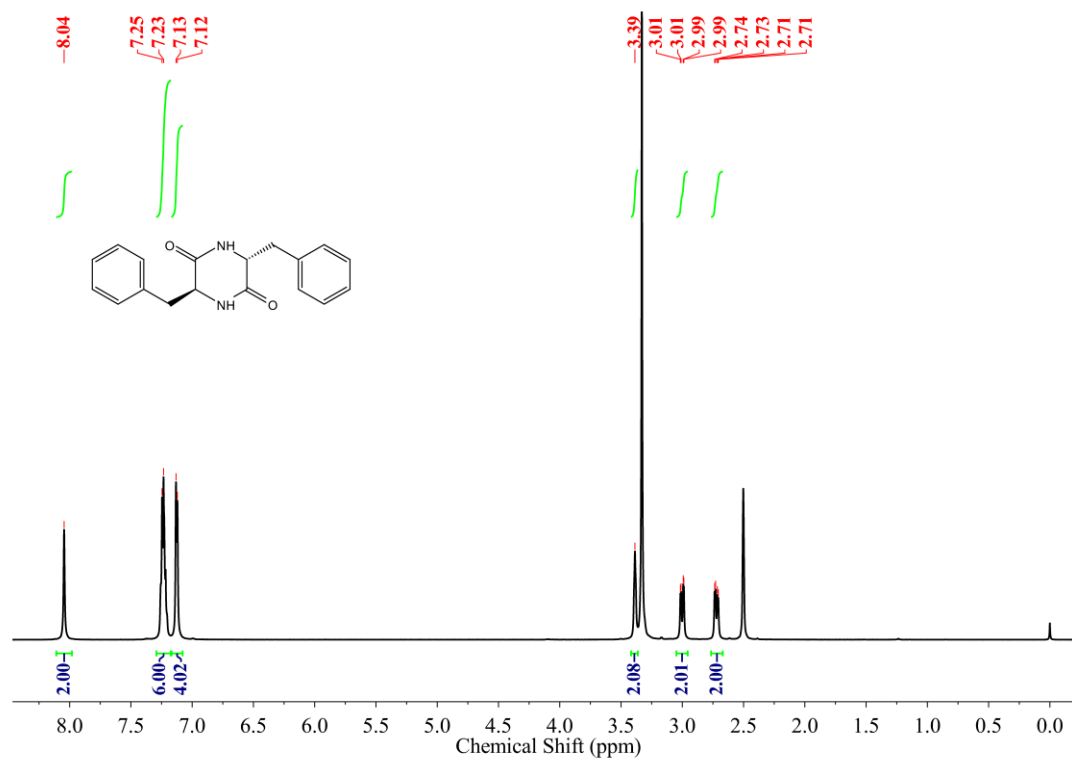

Figure S10.  $^1\text{H}$  NMR spectrum of **2** (600 MHz,  $\text{DMSO}-d_6$ ).

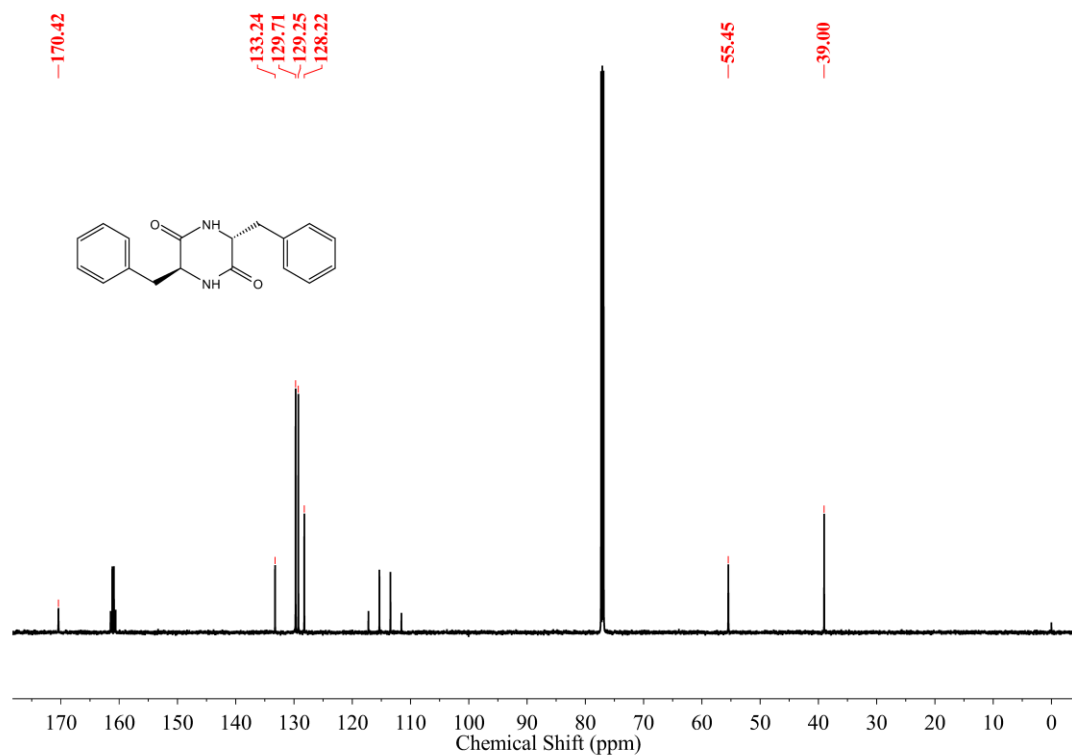

Figure S11.  $^{13}\text{C}$  NMR spectrum of **2** (151 MHz,  $\text{CDCl}_3\text{-CF}_3\text{COOH}$ ).

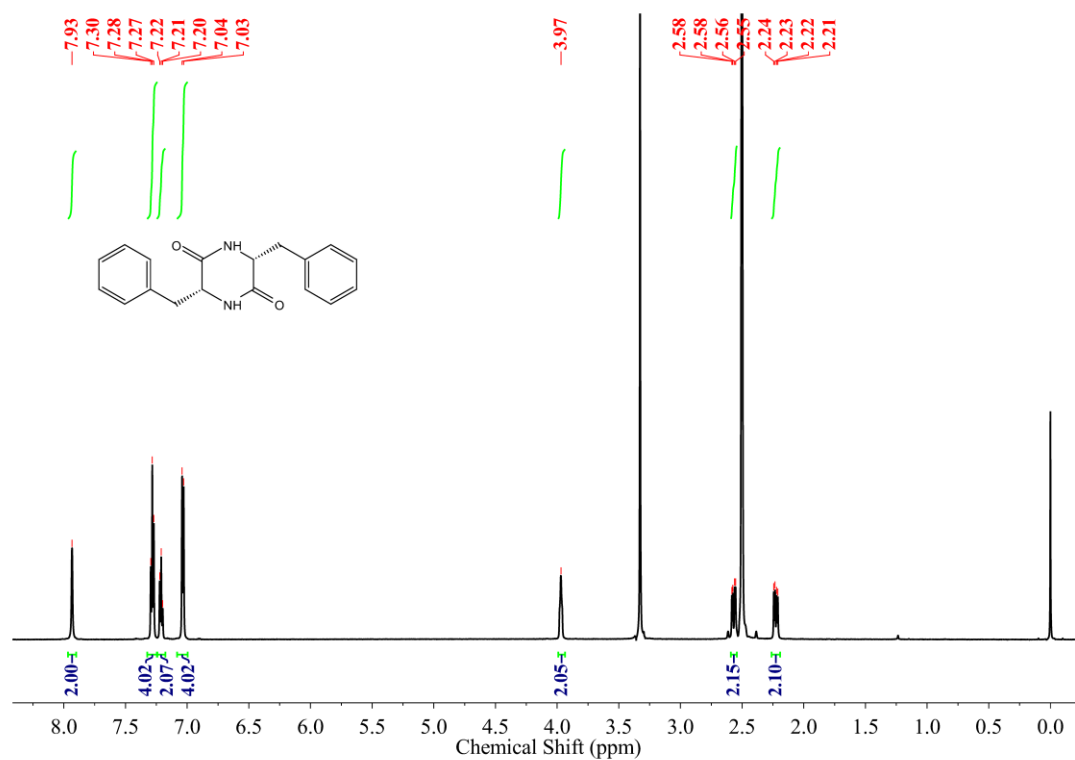

**Figure S12.**  $^1\text{H}$  NMR spectrum of **3** (600 MHz,  $\text{DMSO-}d_6$ ).

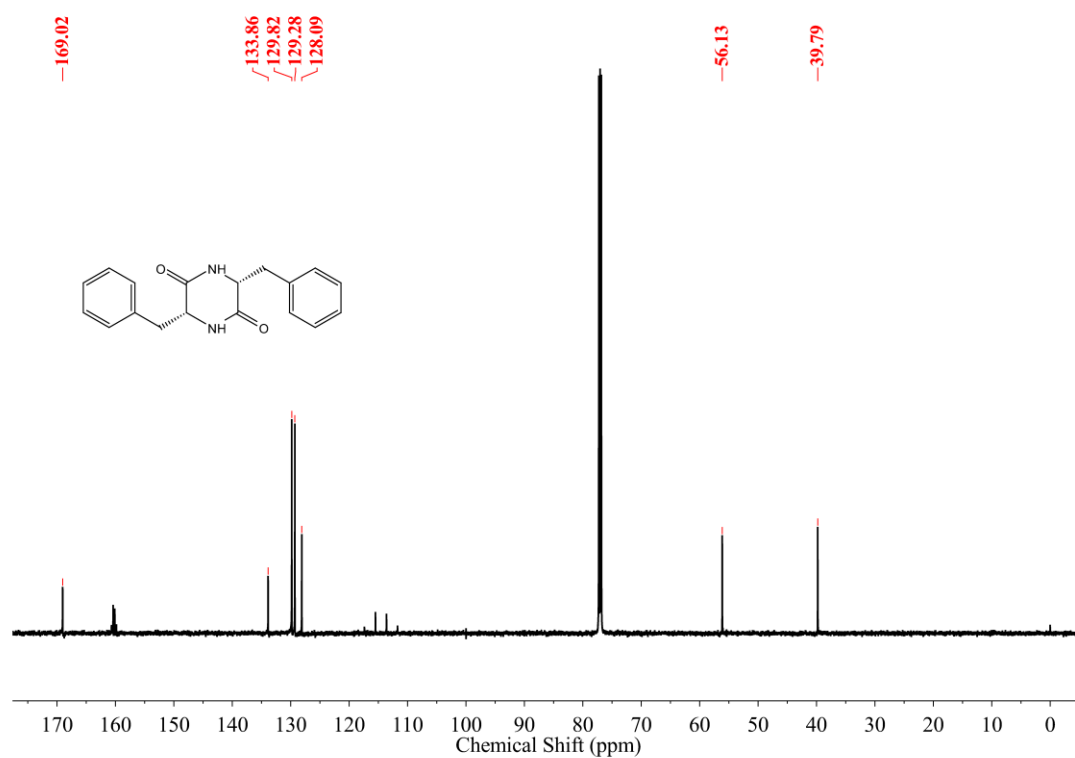

**Figure S13.**  $^{13}\text{C}$  NMR spectrum of **3** (151 MHz,  $\text{CDCl}_3\text{-CF}_3\text{COOH}$ ).

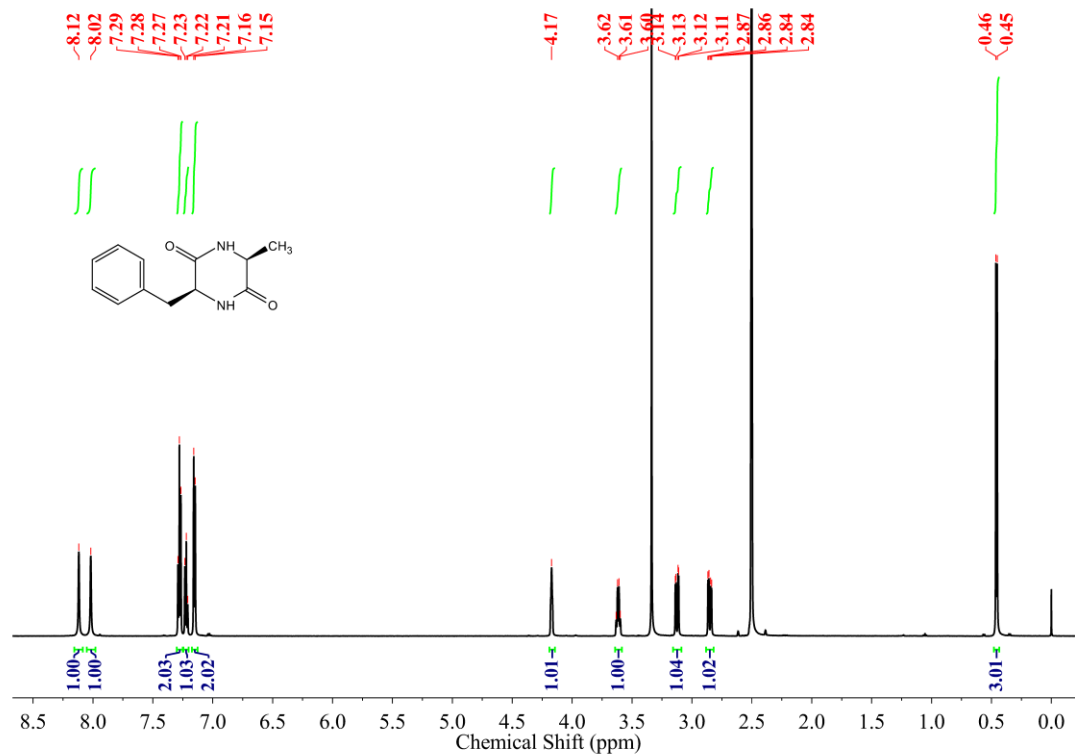

**Figure S14.**  $^1\text{H}$  NMR spectrum of **4** (600 MHz,  $\text{DMSO-}d_6$ ).

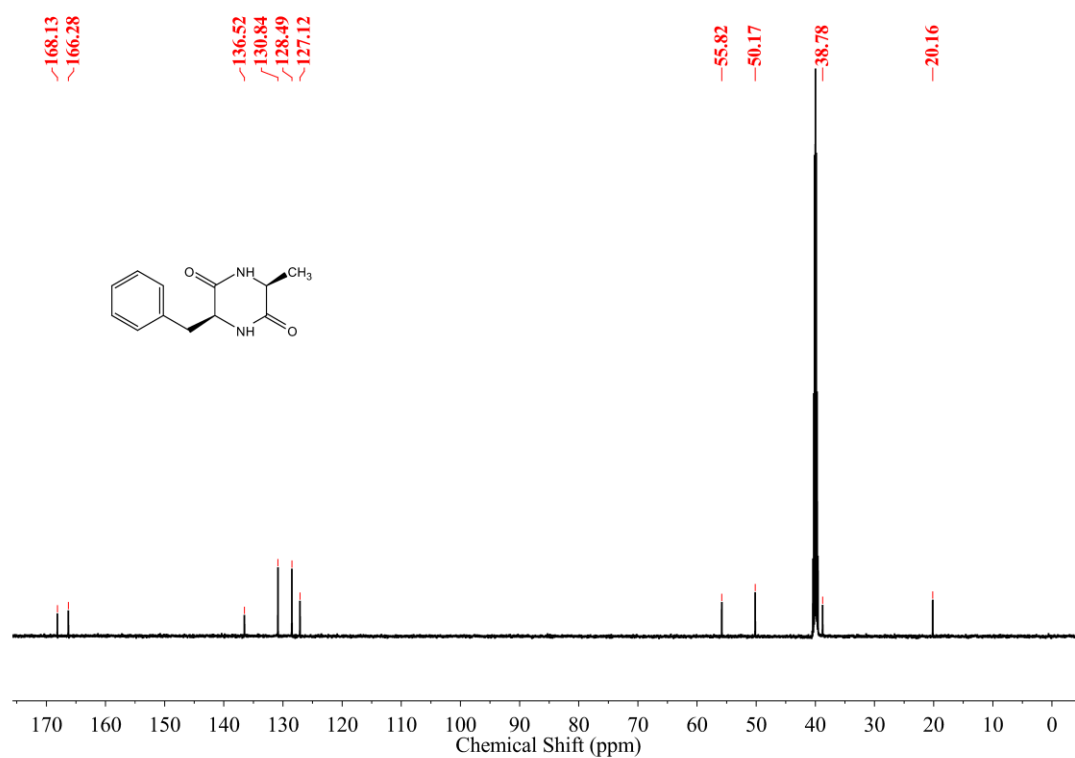

**Figure S15.**  $^{13}\text{C}$  NMR spectrum of **4** (151 MHz,  $\text{DMSO-}d_6$ ).

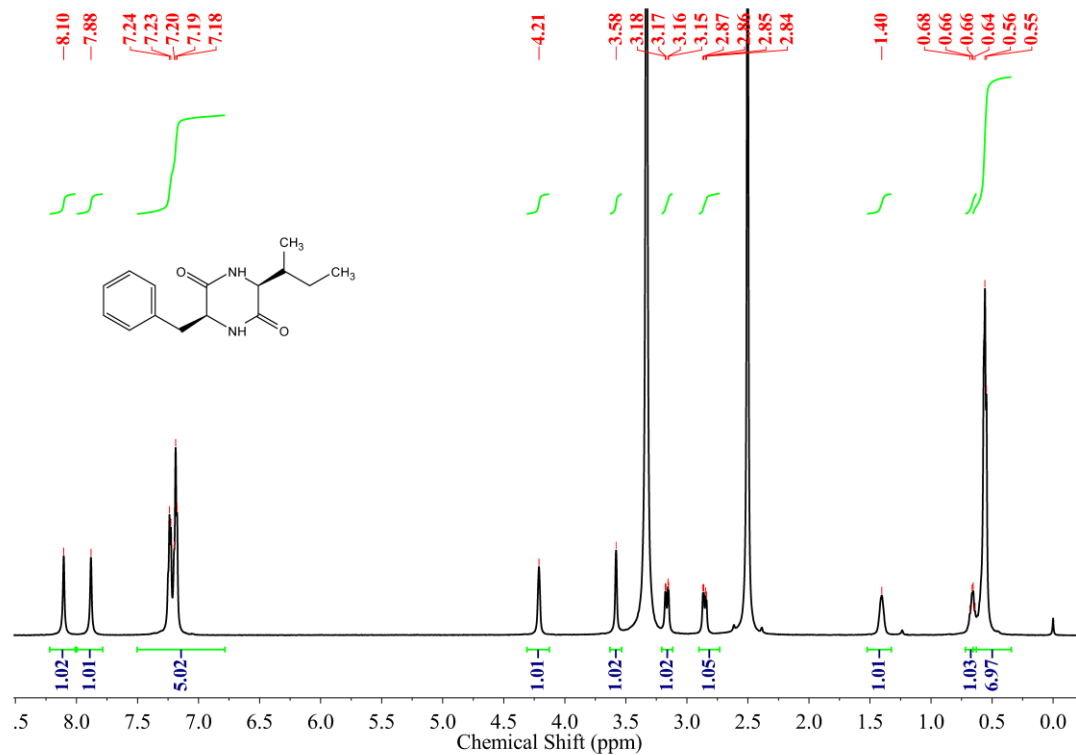

**Figure S16.**  $^1\text{H}$  NMR spectrum of **5** (600 MHz,  $\text{DMSO-}d_6$ ).

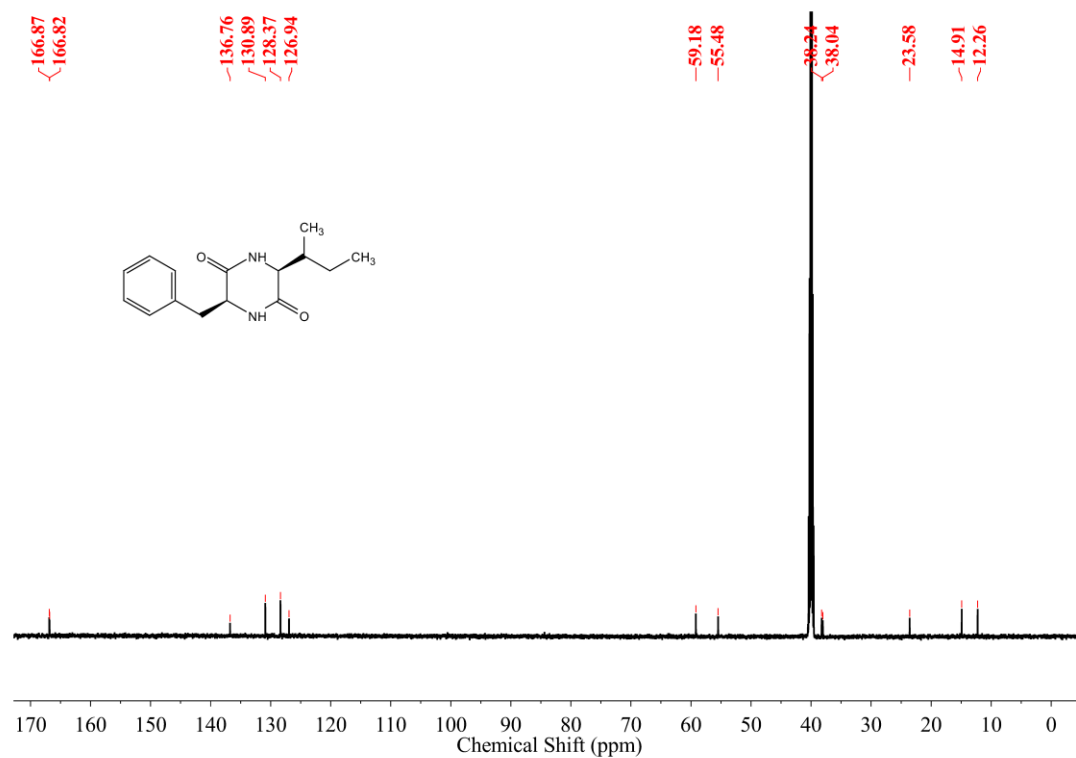

**Figure S17.**  $^{13}\text{C}$  NMR spectrum of **5** (151 MHz,  $\text{DMSO-}d_6$ ).

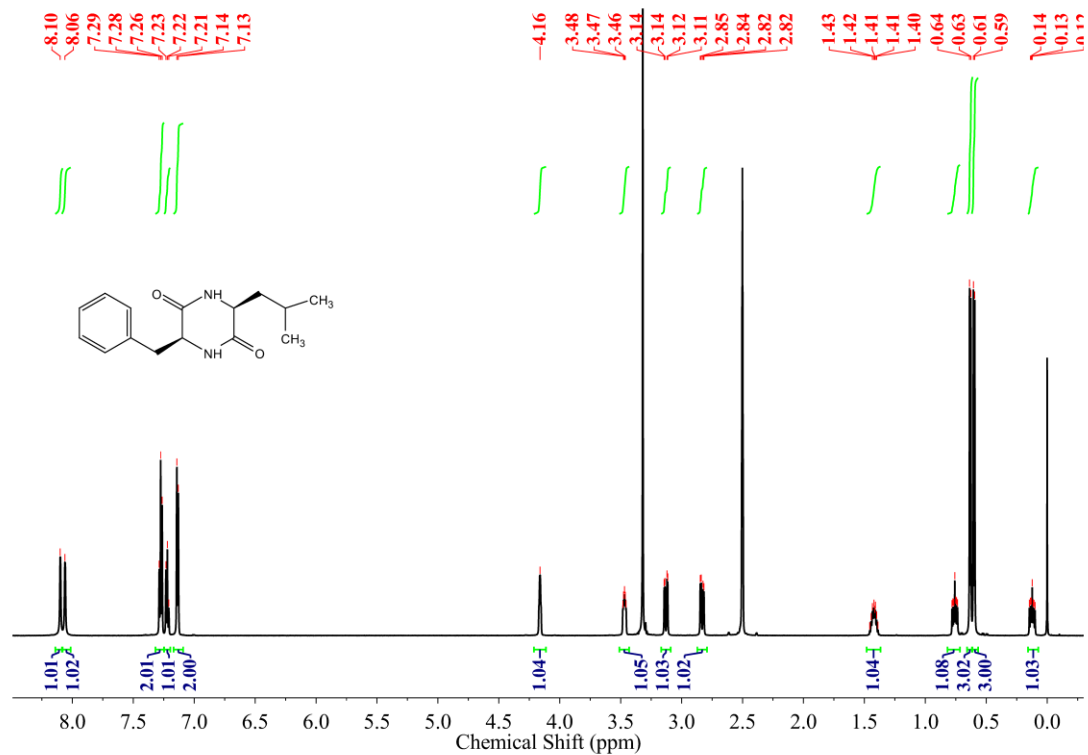

**Figure S18.**  $^1\text{H}$  NMR spectrum of **6** (600 MHz,  $\text{DMSO-}d_6$ ).

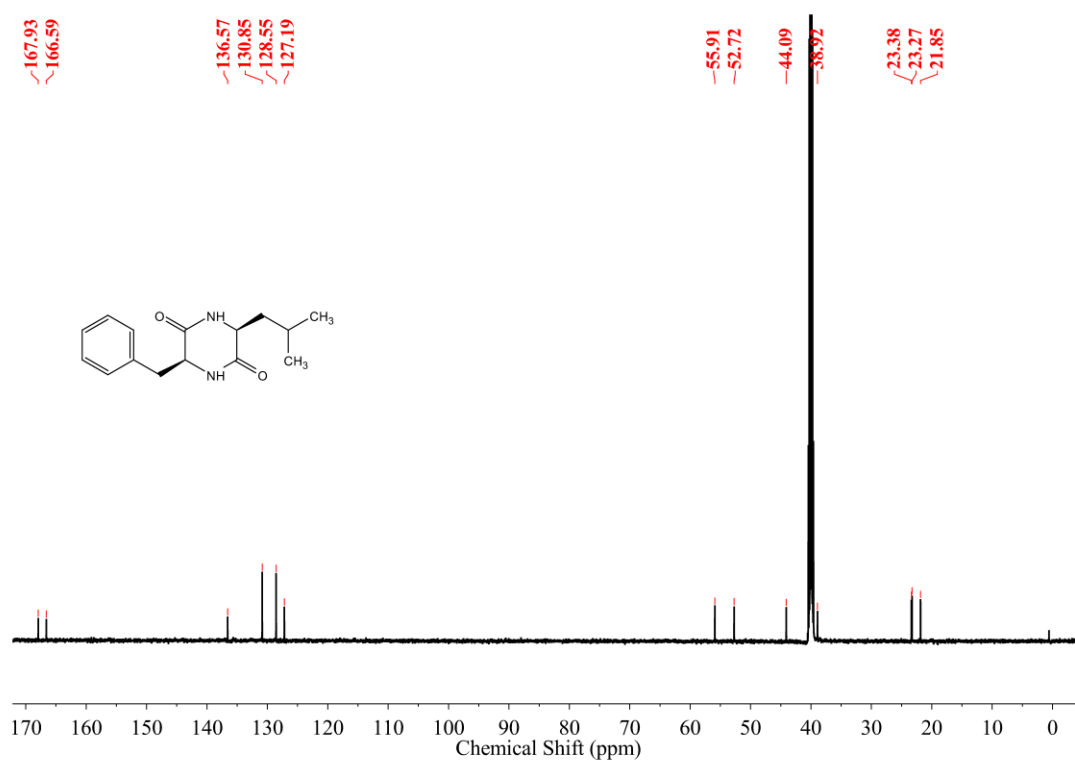

**Figure S19.**  $^{13}\text{C}$  NMR spectrum of **6** (151 MHz,  $\text{DMSO-}d_6$ ).

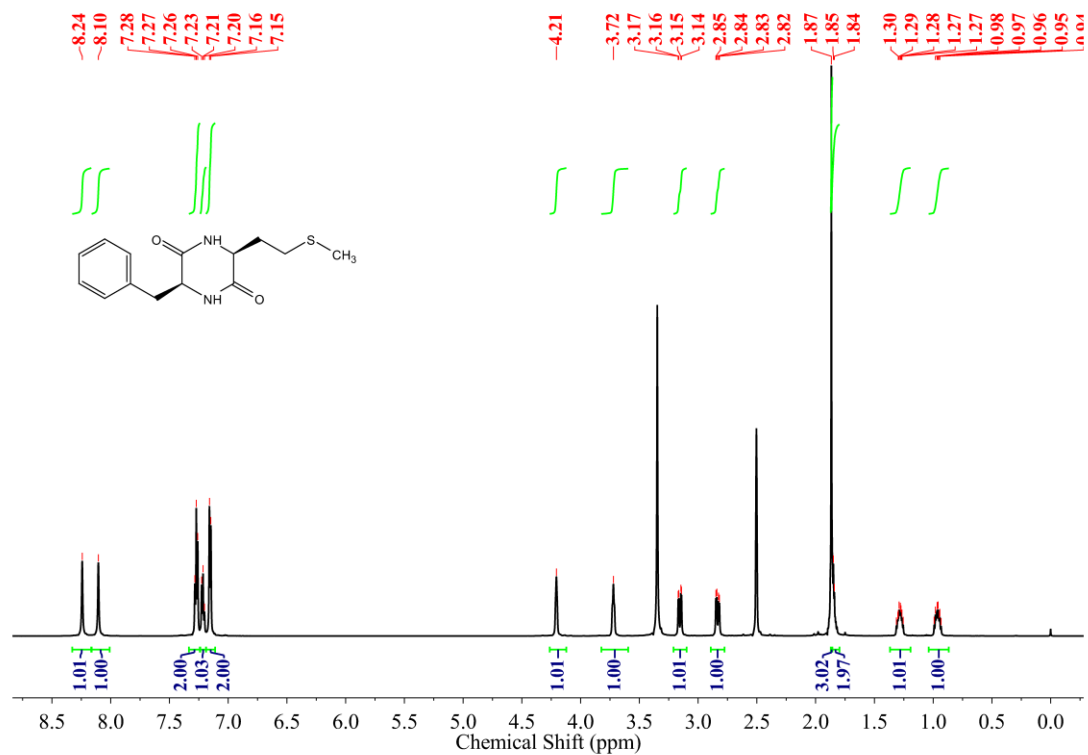

**Figure S20.** <sup>1</sup>H NMR spectrum of **7** (600 MHz, DMSO-*d*<sub>6</sub>).

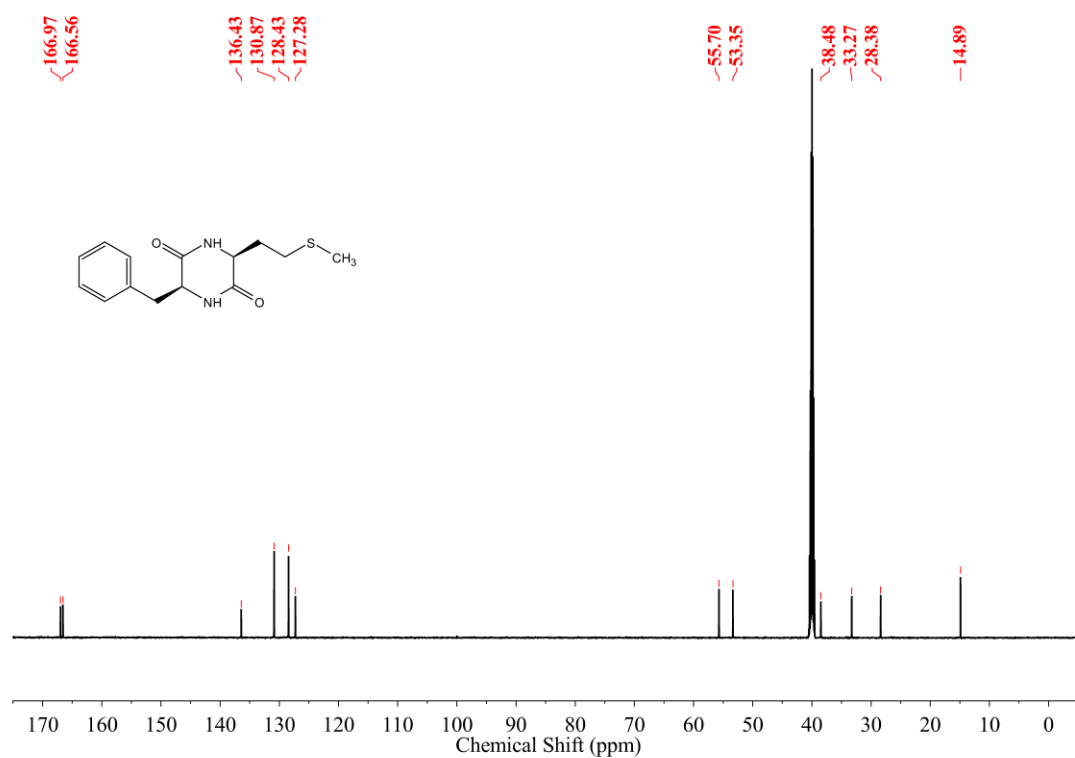

**Figure S21.** <sup>13</sup>C NMR spectrum of **7** (151 MHz, DMSO-*d*<sub>6</sub>).

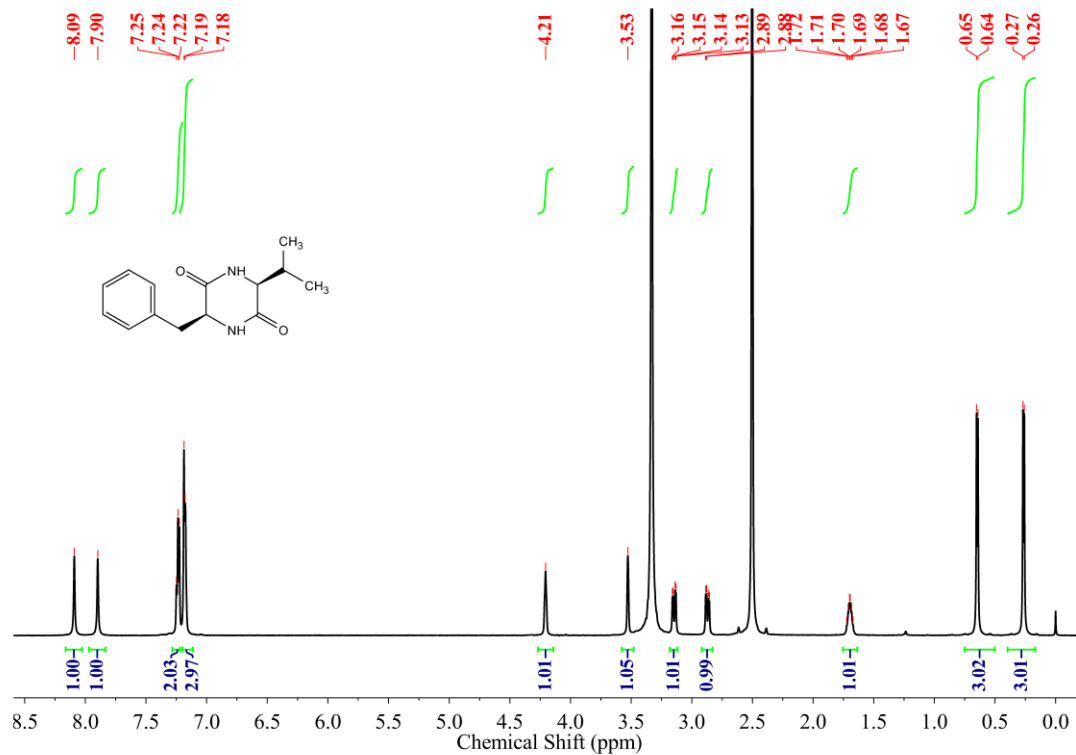

**Figure S22.**  $^1\text{H}$  NMR spectrum of **8** (600 MHz,  $\text{DMSO-}d_6$ ).

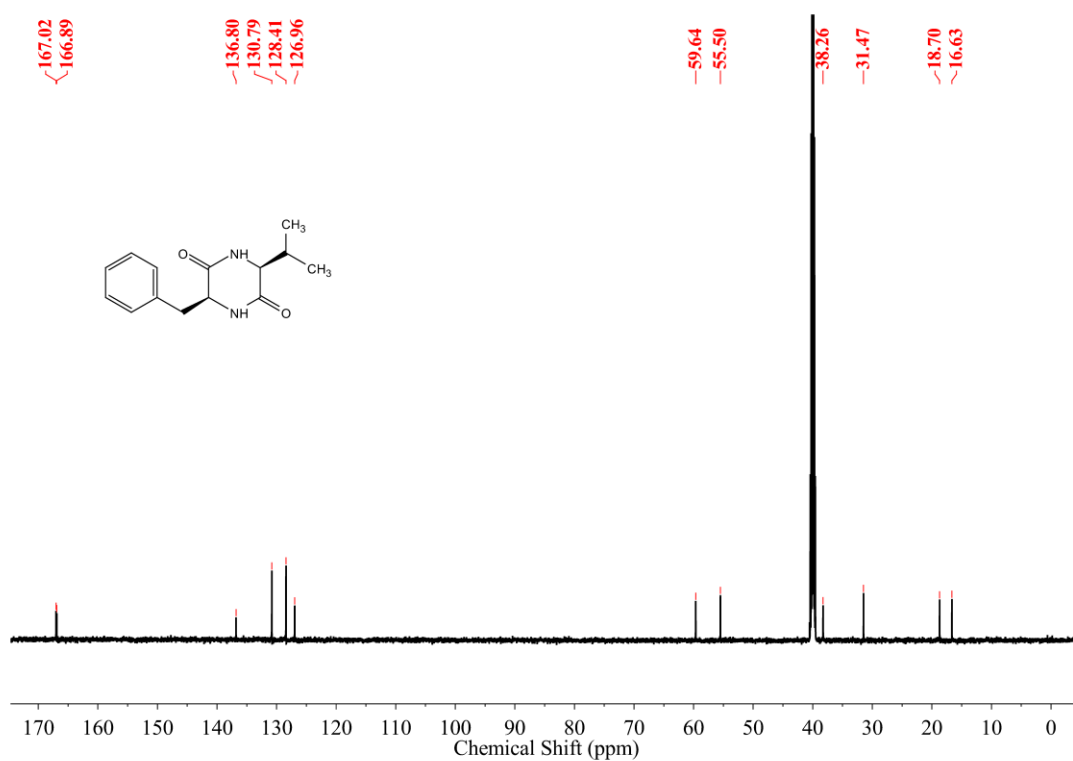

**Figure S23.**  $^{13}\text{C}$  NMR spectrum of **8** (151 MHz,  $\text{DMSO-}d_6$ ).

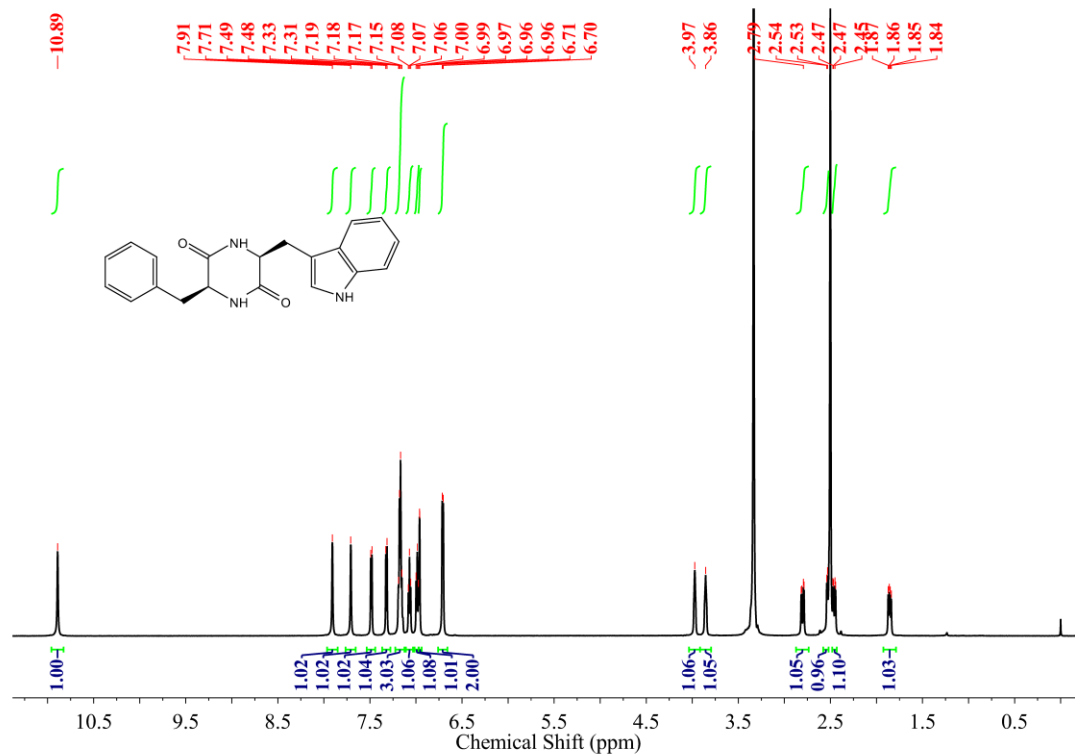

**Figure S24.**  $^1\text{H}$  NMR spectrum of **9** (600 MHz,  $\text{DMSO-}d_6$ ).

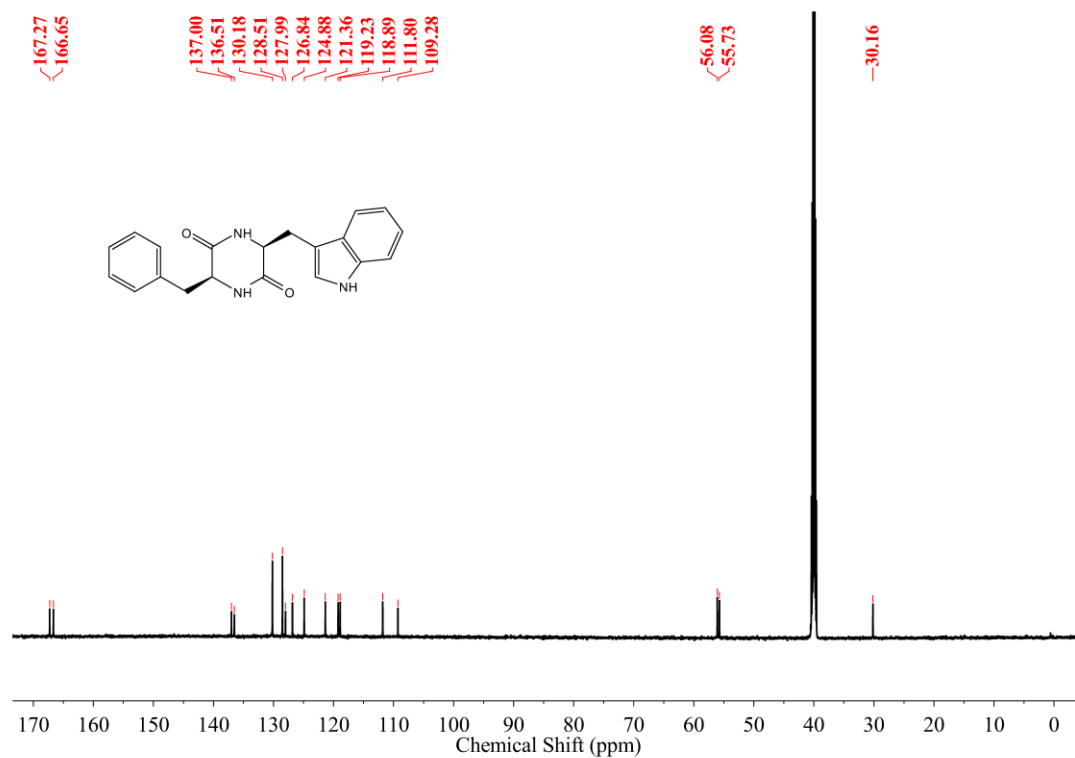

**Figure S25.**  $^{13}\text{C}$  NMR spectrum of **9** (151 MHz,  $\text{DMSO-}d_6$ ).

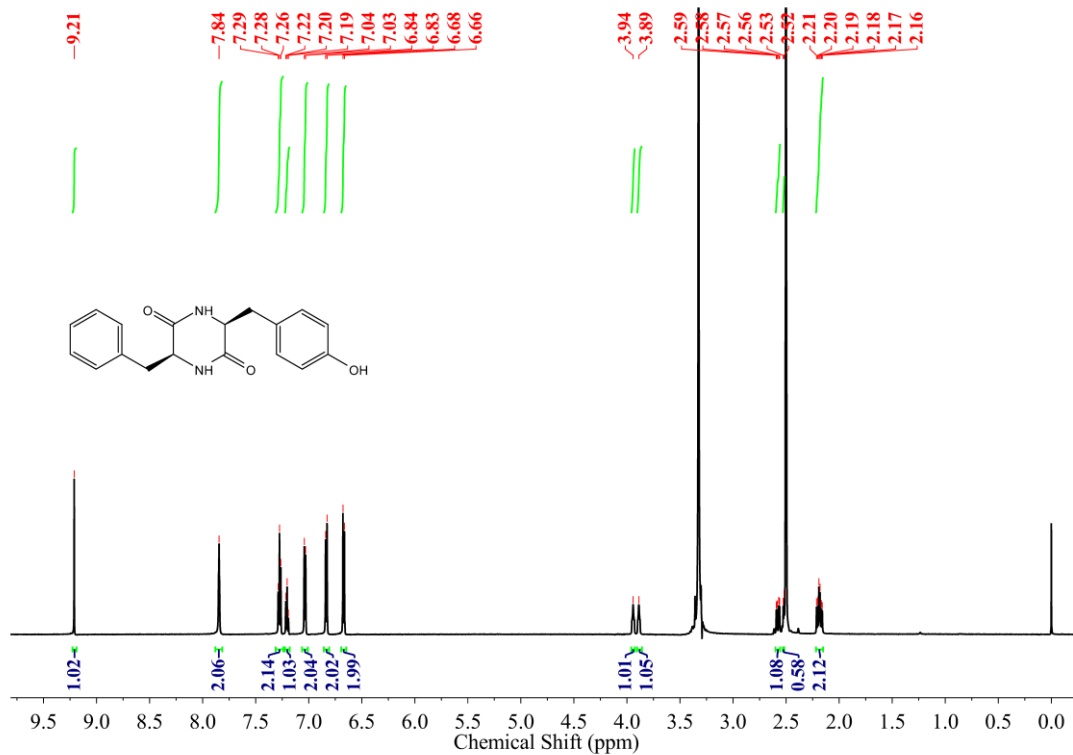

**Figure S26.**  $^1\text{H}$  NMR spectrum of **10** (600 MHz,  $\text{DMSO-}d_6$ ).

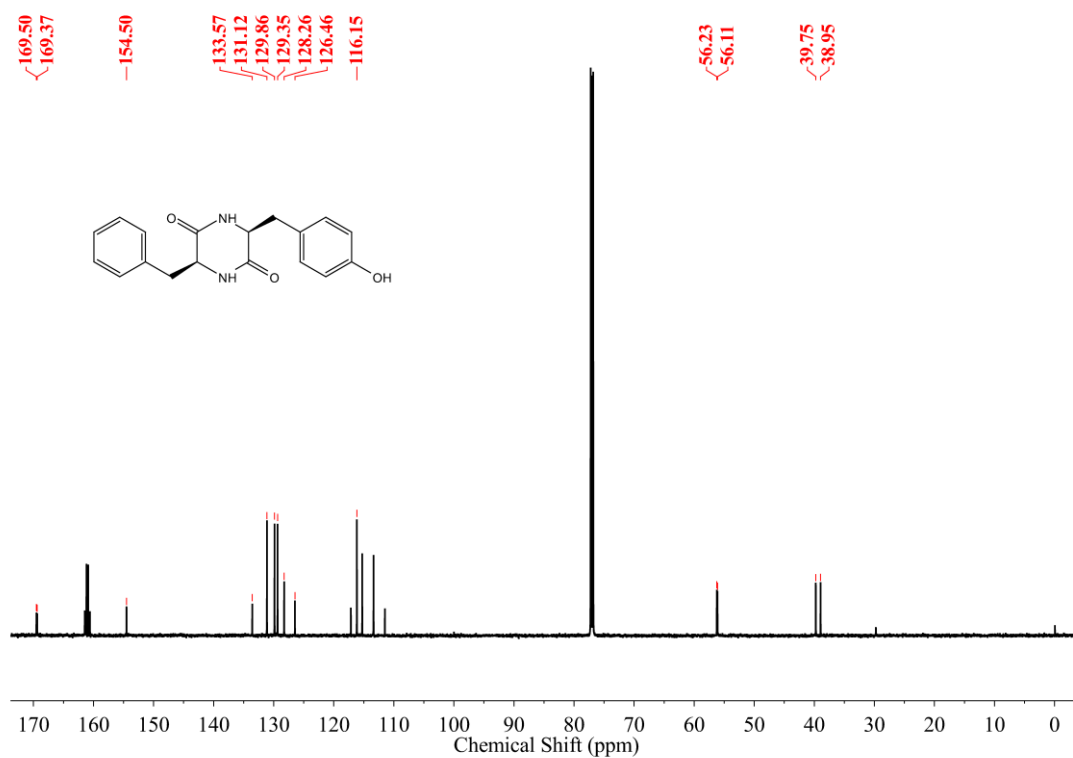

**Figure S27.**  $^{13}\text{C}$  NMR spectrum of **10** (151 MHz,  $\text{CDCl}_3\text{-CF}_3\text{COOH}$ ).

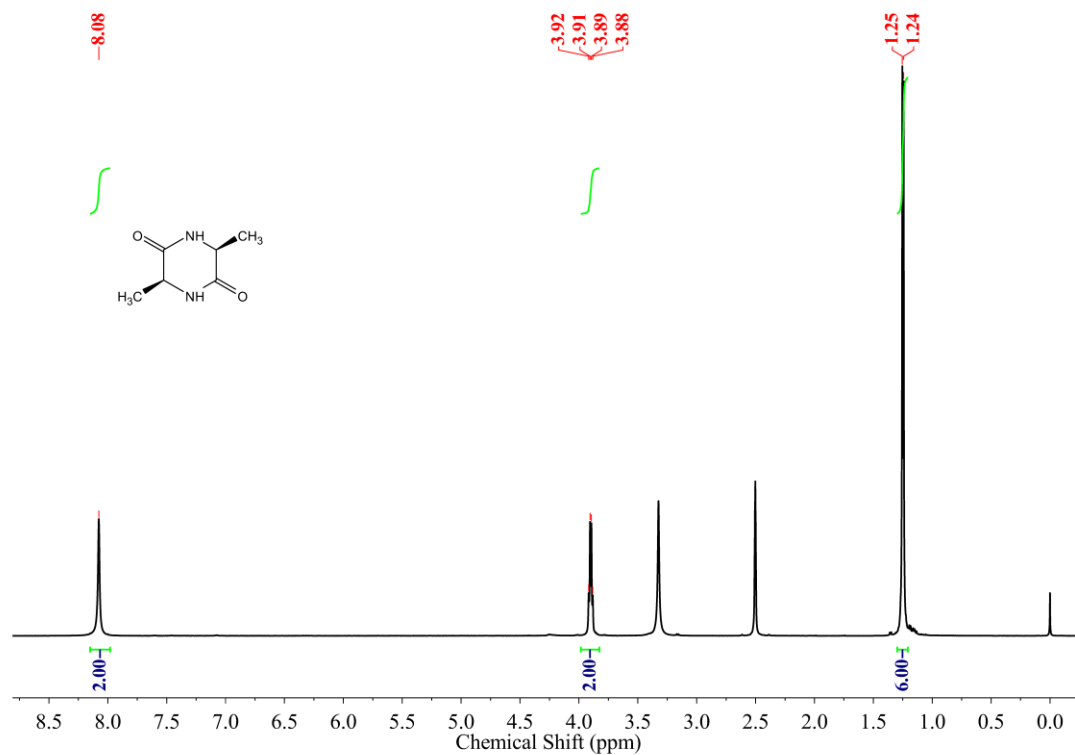

**Figure S28.** <sup>1</sup>H NMR spectrum of **11** (600 MHz, DMSO-*d*<sub>6</sub>).

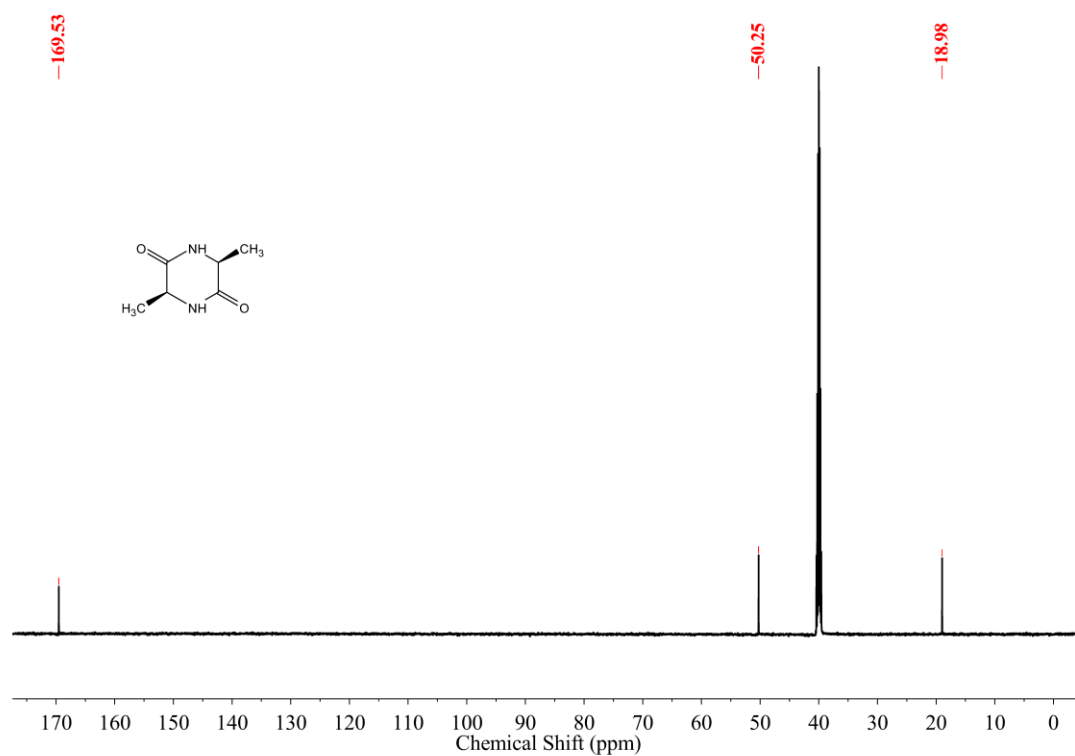

**Figure S29.** <sup>13</sup>C NMR spectrum of **11** (151 MHz, DMSO-*d*<sub>6</sub>).

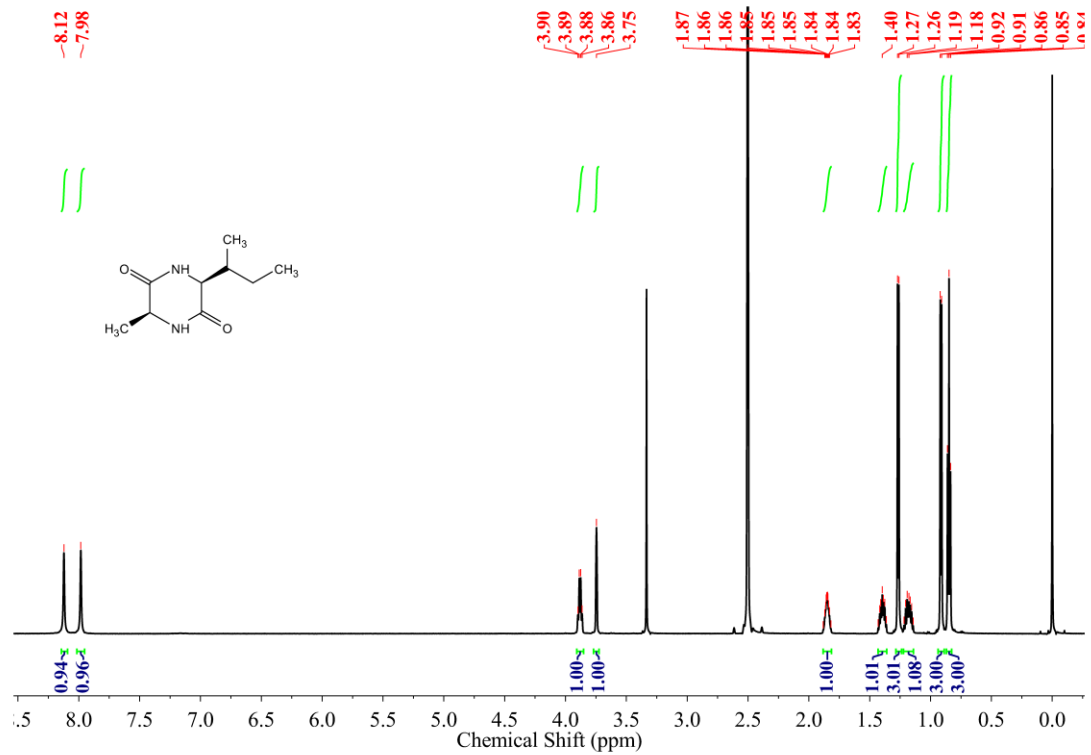

**Figure S30.** <sup>1</sup>H NMR spectrum of **12** (600 MHz, DMSO-*d*<sub>6</sub>).

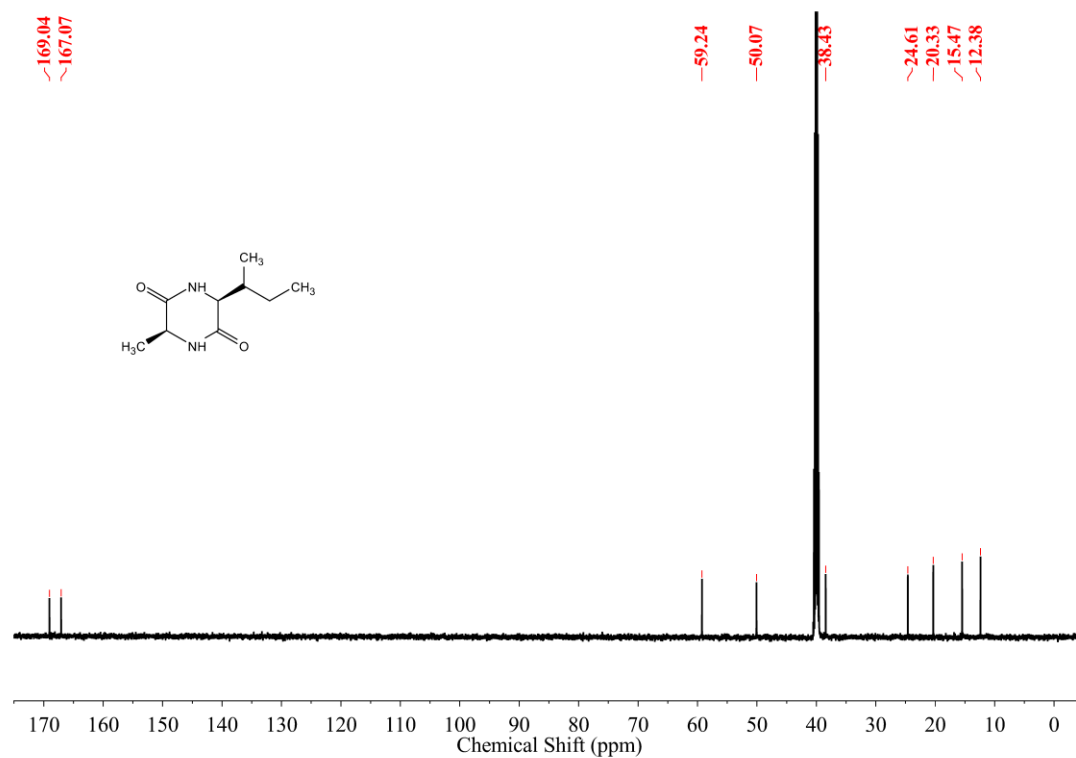

**Figure S31.** <sup>13</sup>C NMR spectrum of **12** (151 MHz, DMSO-*d*<sub>6</sub>).

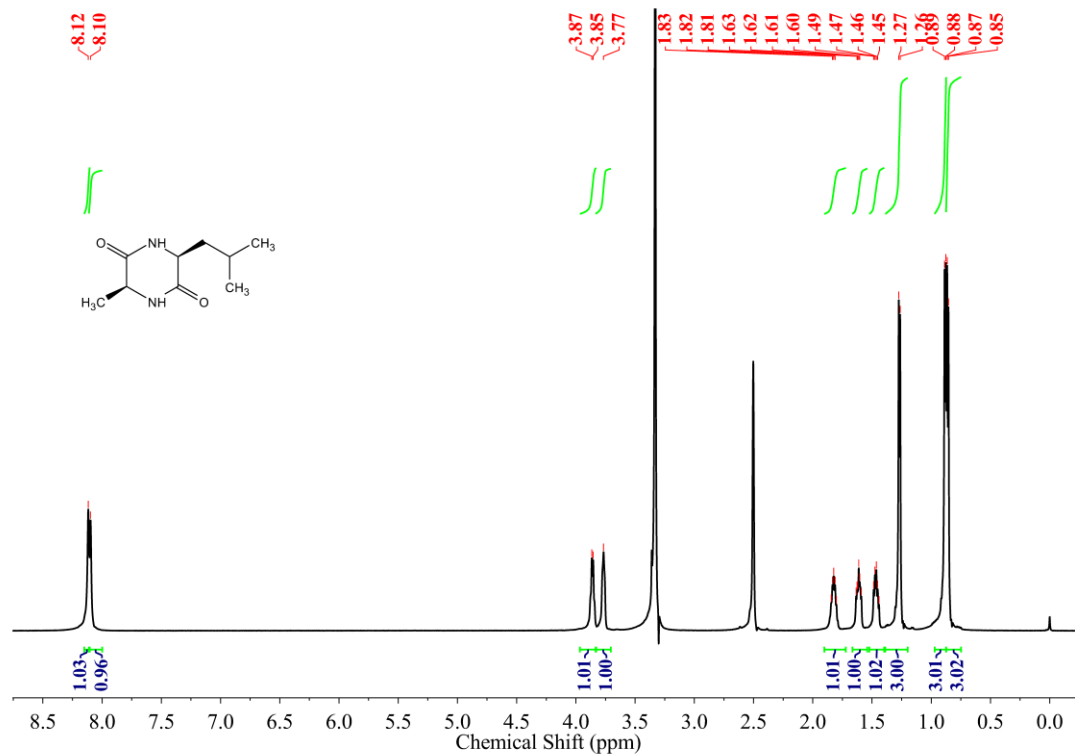

**Figure S32.** <sup>1</sup>H NMR spectrum of **13** (600 MHz, DMSO-*d*<sub>6</sub>).

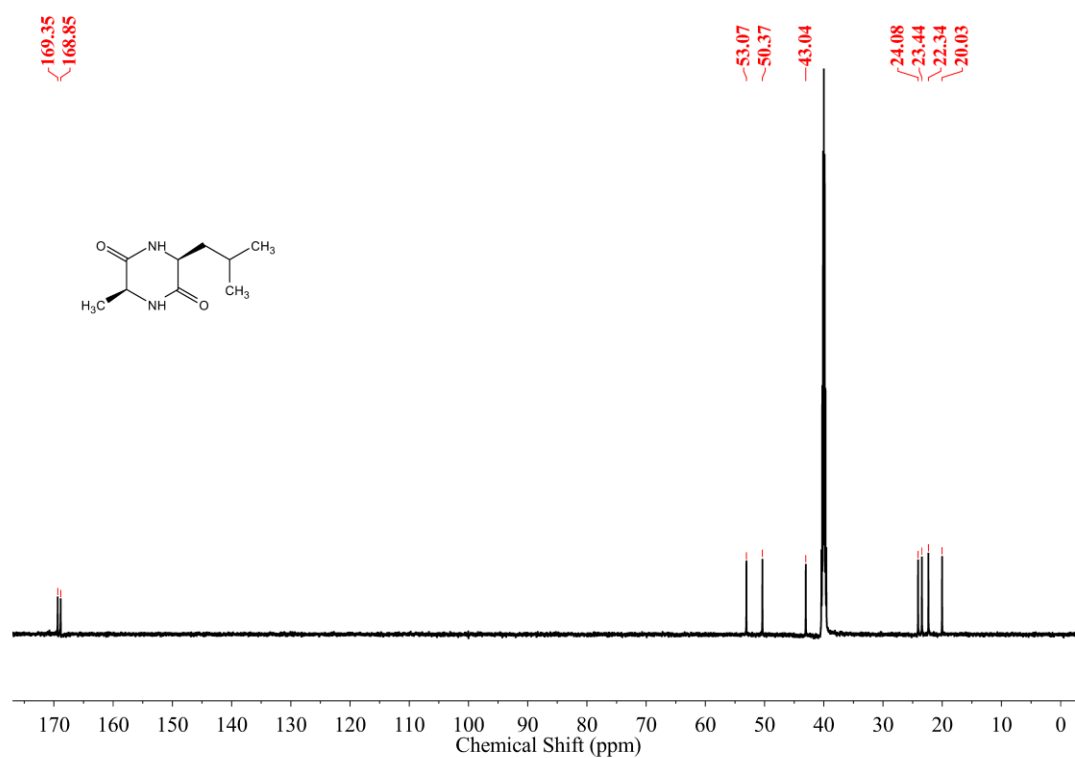

**Figure S33.** <sup>13</sup>C NMR spectrum of **13** (151 MHz, DMSO-*d*<sub>6</sub>).

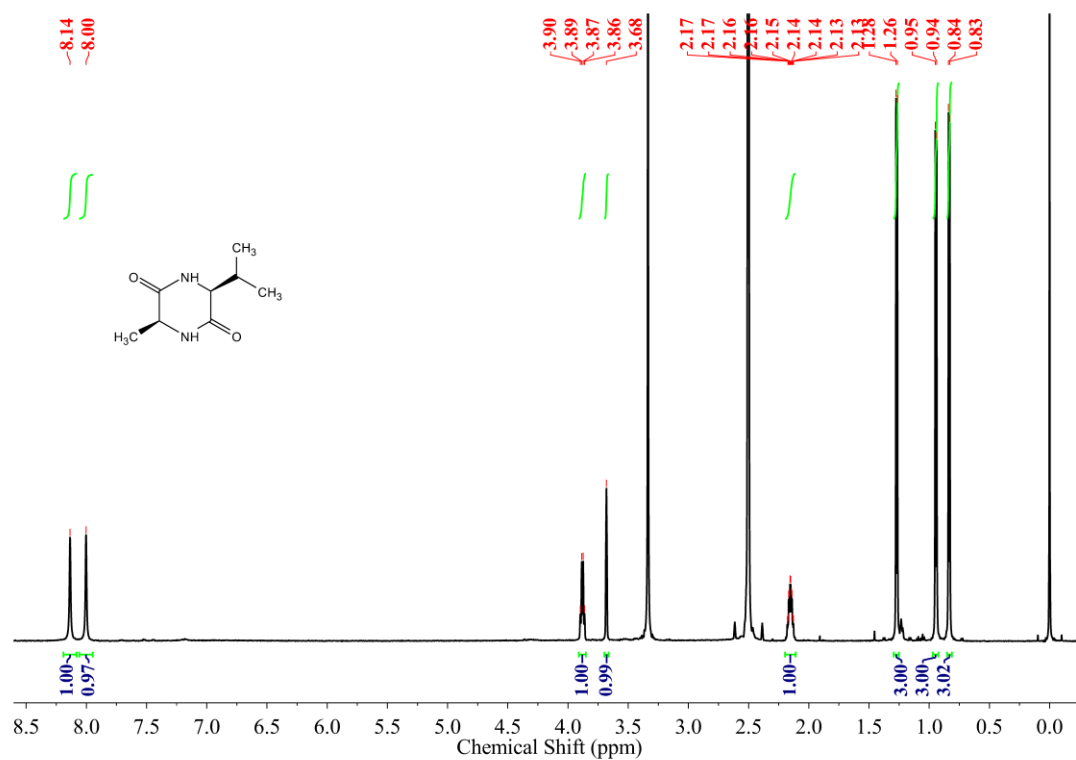

**Figure S34.**  $^1\text{H}$  NMR spectrum of **14** (600 MHz,  $\text{DMSO}-d_6$ ).

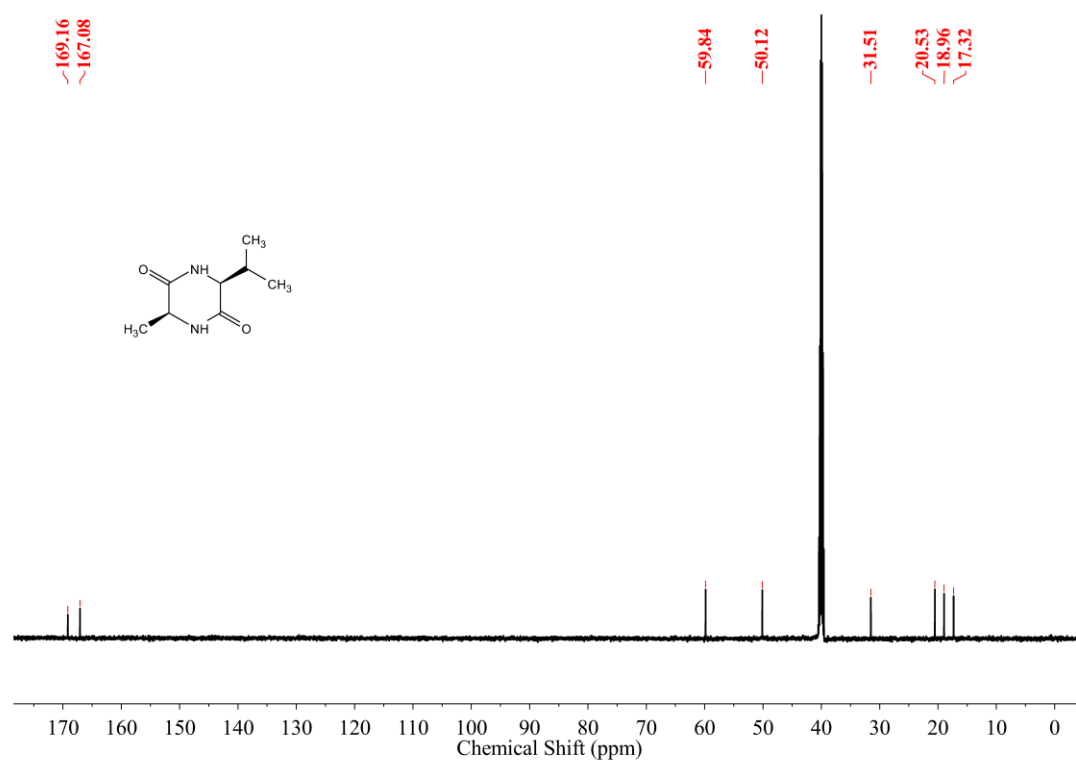

**Figure S35.**  $^{13}\text{C}$  NMR spectrum of **14** (151 MHz,  $\text{DMSO}-d_6$ ).

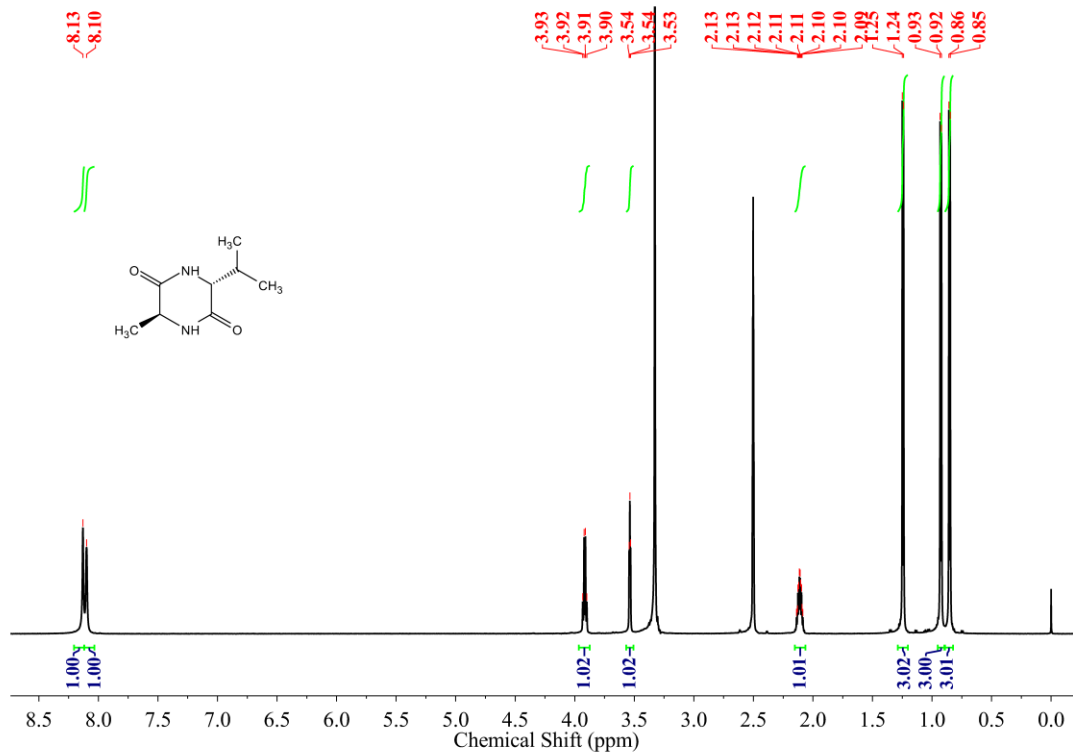

**Figure S36.**  $^1\text{H}$  NMR spectrum of **15** (600 MHz,  $\text{DMSO-}d_6$ ).

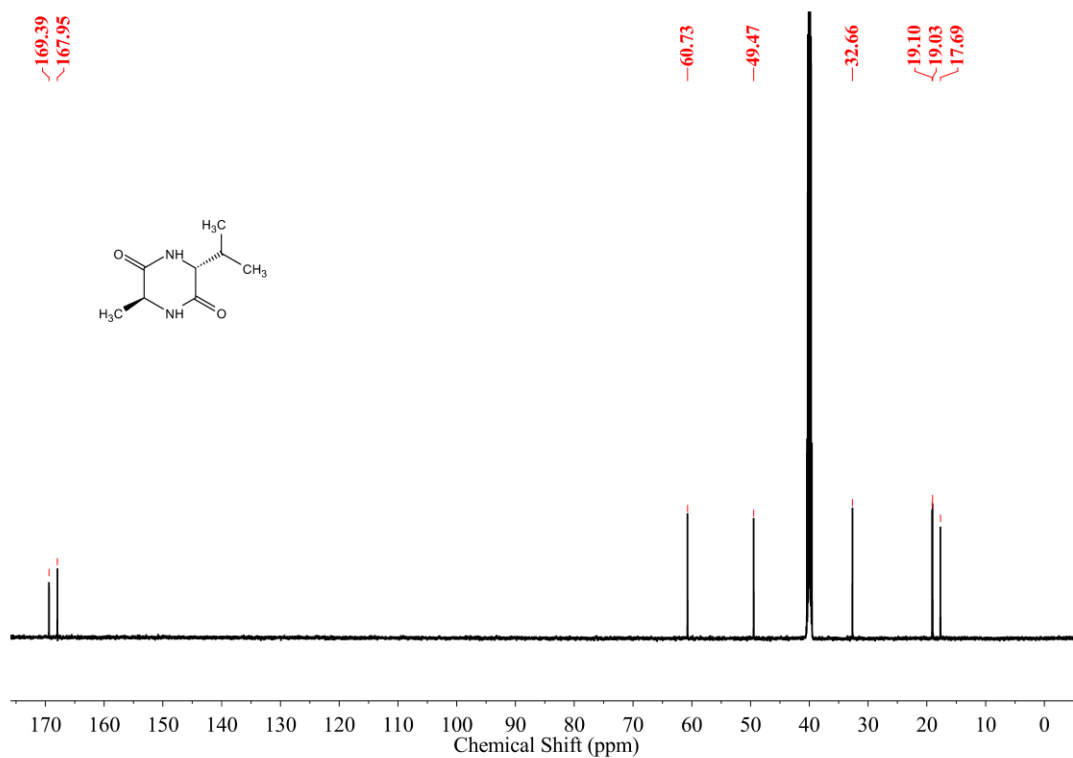

**Figure S37.**  $^{13}\text{C}$  NMR spectrum of **15** (151 MHz,  $\text{DMSO-}d_6$ ).

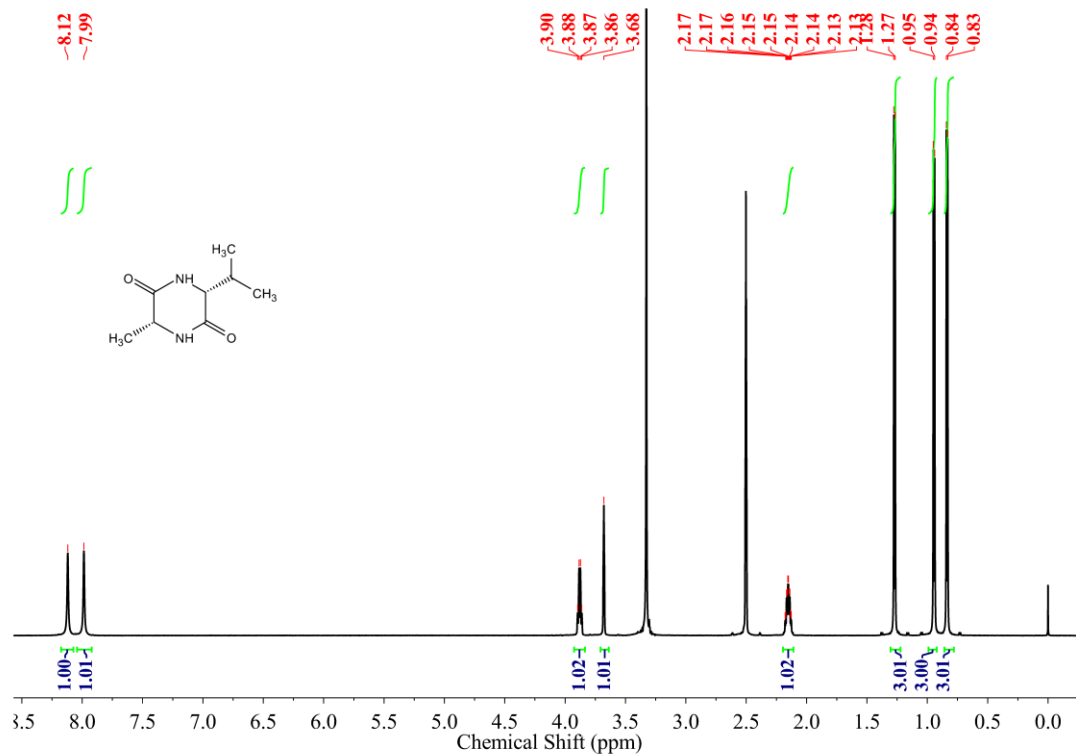

**Figure S38.**  $^1\text{H}$  NMR spectrum of **16** (600 MHz,  $\text{DMSO}-d_6$ ).

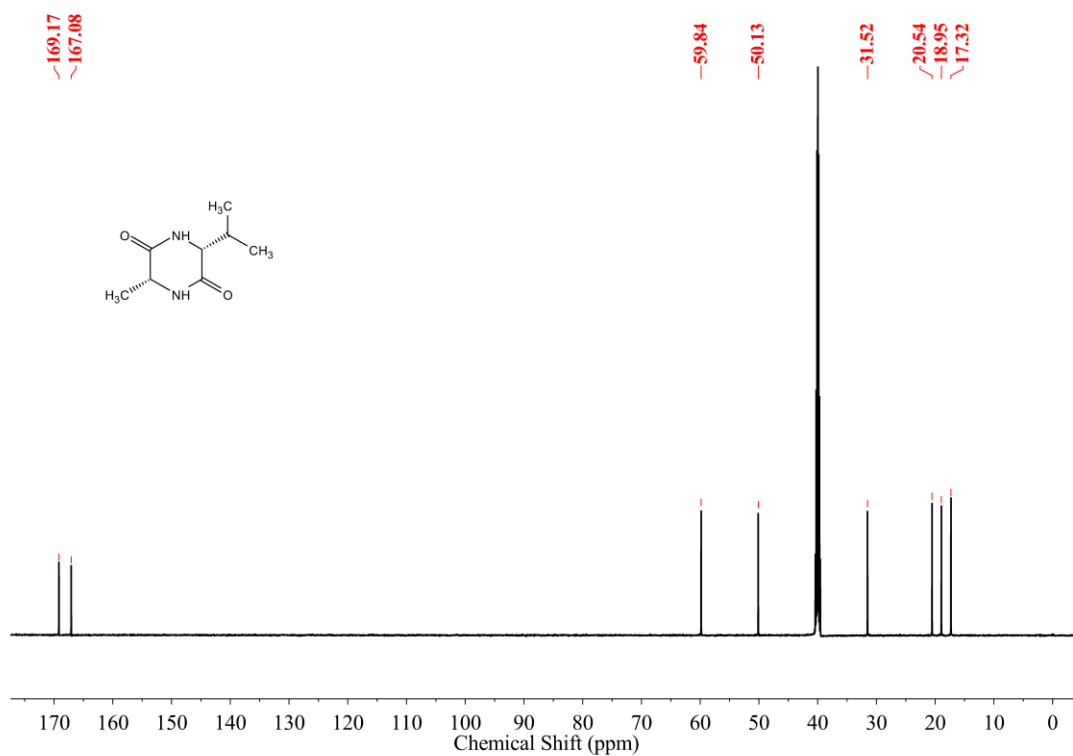

**Figure S39.**  $^{13}\text{C}$  NMR spectrum of **16** (151 MHz,  $\text{DMSO}-d_6$ ).

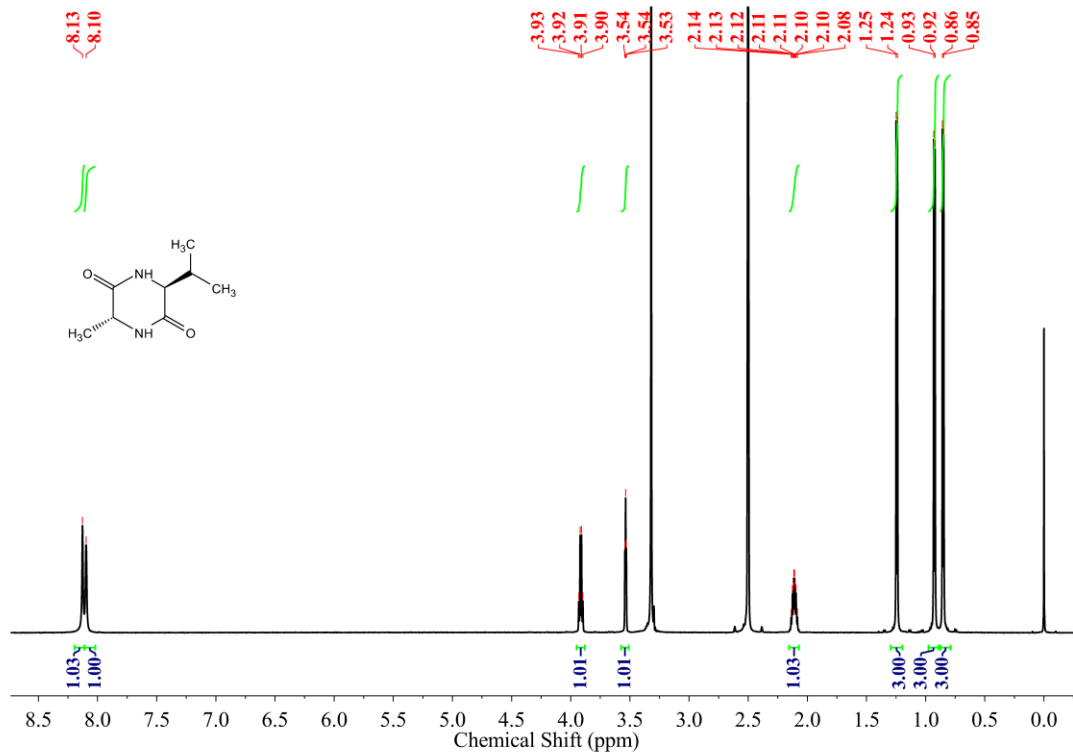

**Figure S40.** <sup>1</sup>H NMR spectrum of **17** (600 MHz, DMSO-*d*<sub>6</sub>).

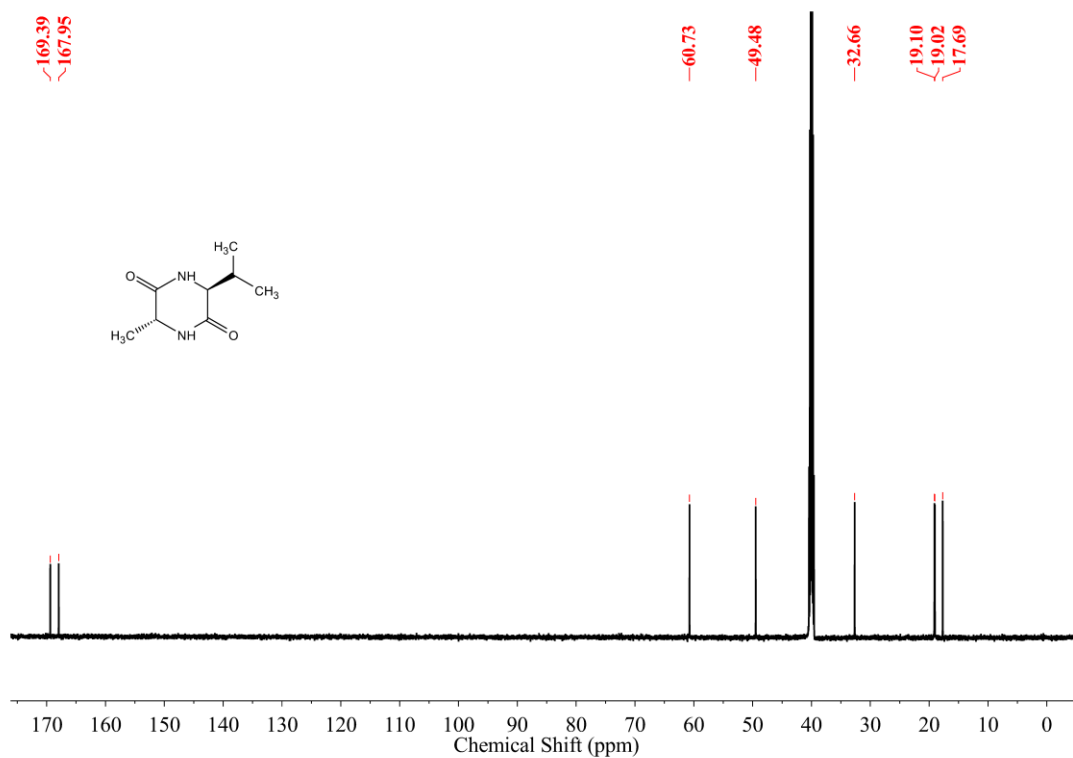

**Figure S41.** <sup>13</sup>C NMR spectrum of **17** (151 MHz, DMSO-*d*<sub>6</sub>).

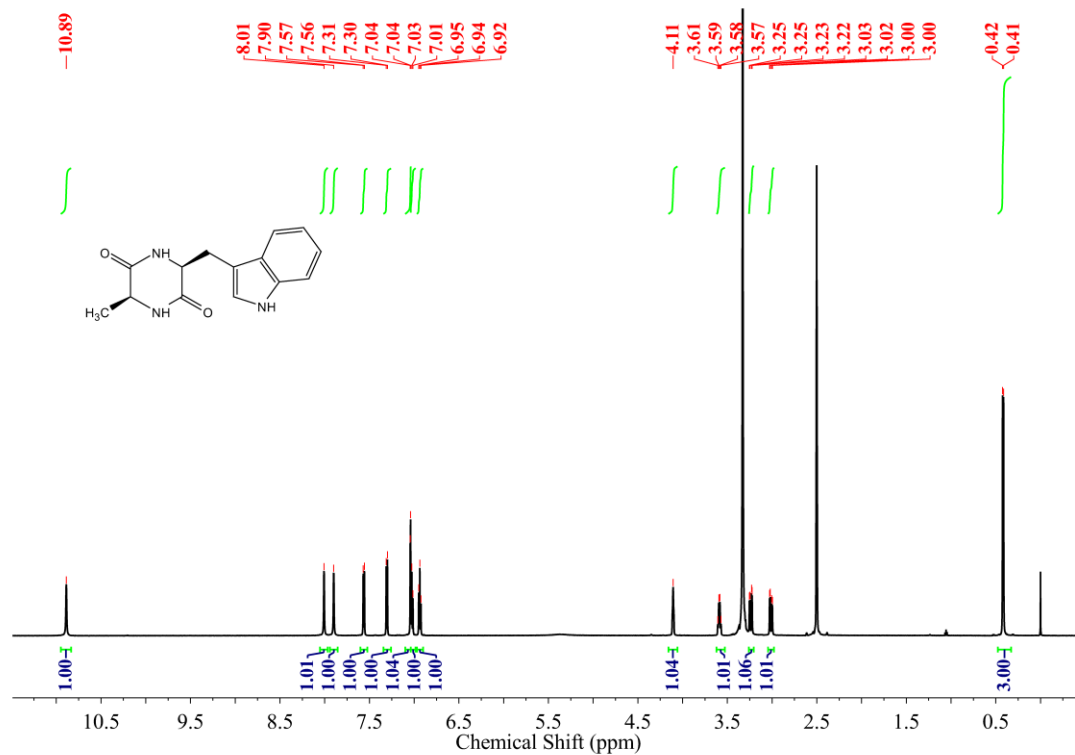

**Figure S42.**  $^1\text{H}$  NMR spectrum of **18** (600 MHz,  $\text{DMSO-}d_6$ ).

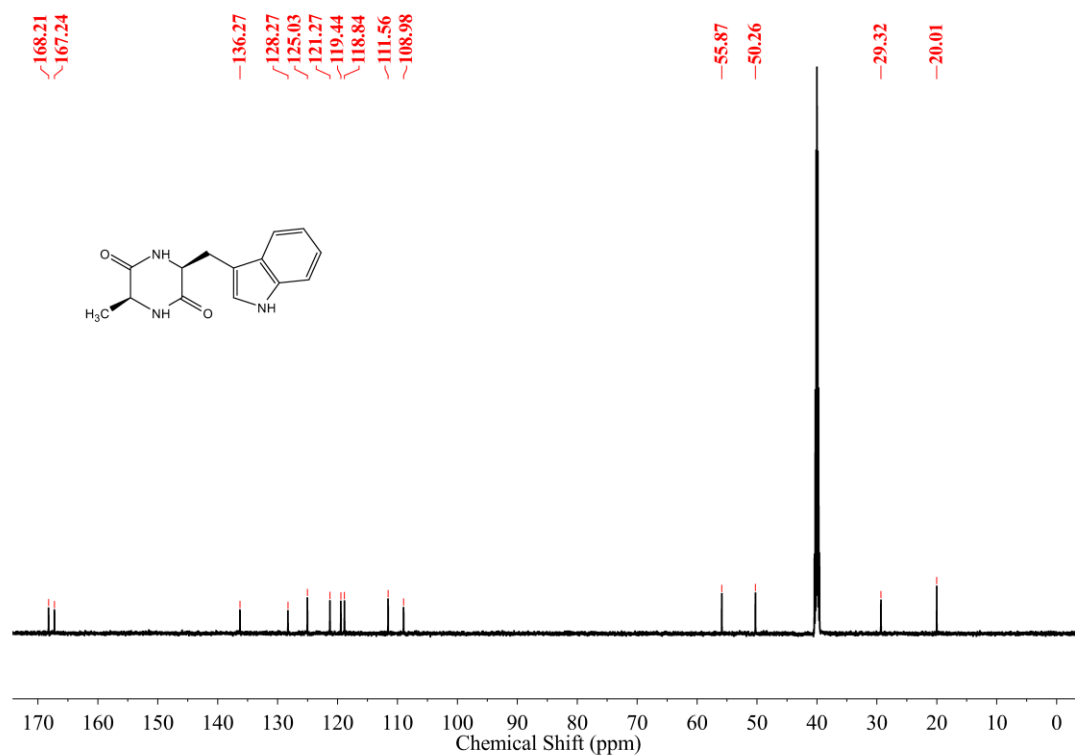

**Figure S43.**  $^{13}\text{C}$  NMR spectrum of **18** (151 MHz,  $\text{DMSO-}d_6$ ).

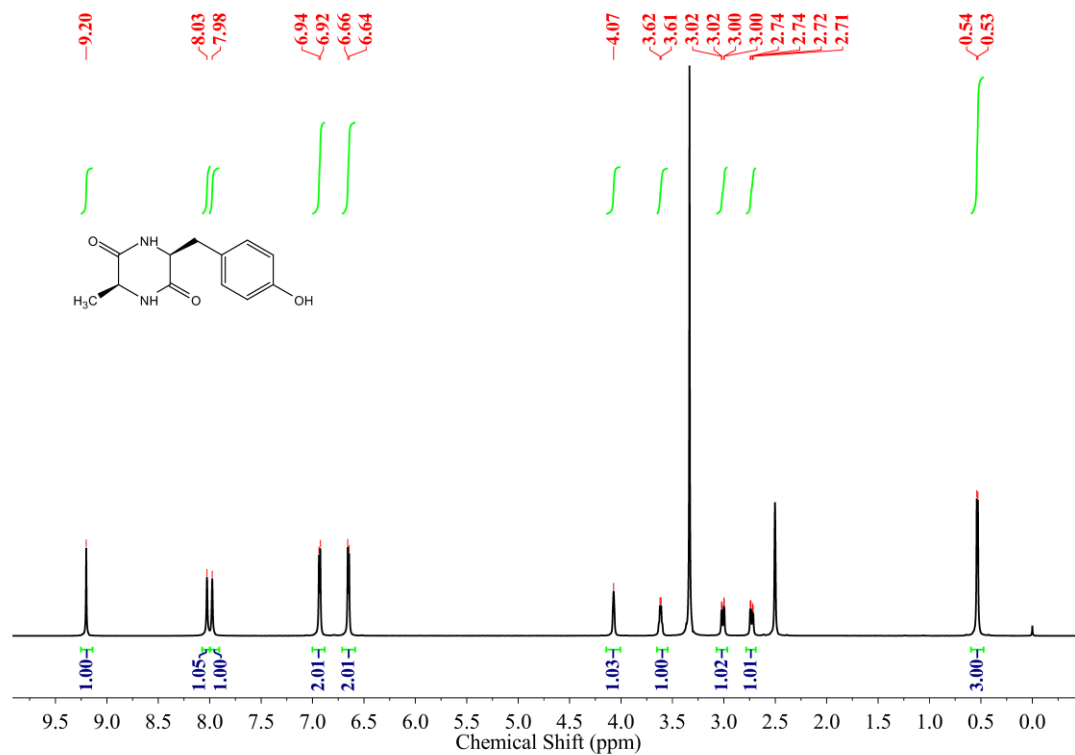

**Figure S44.** <sup>1</sup>H NMR spectrum of **19** (600 MHz, DMSO-*d*<sub>6</sub>).

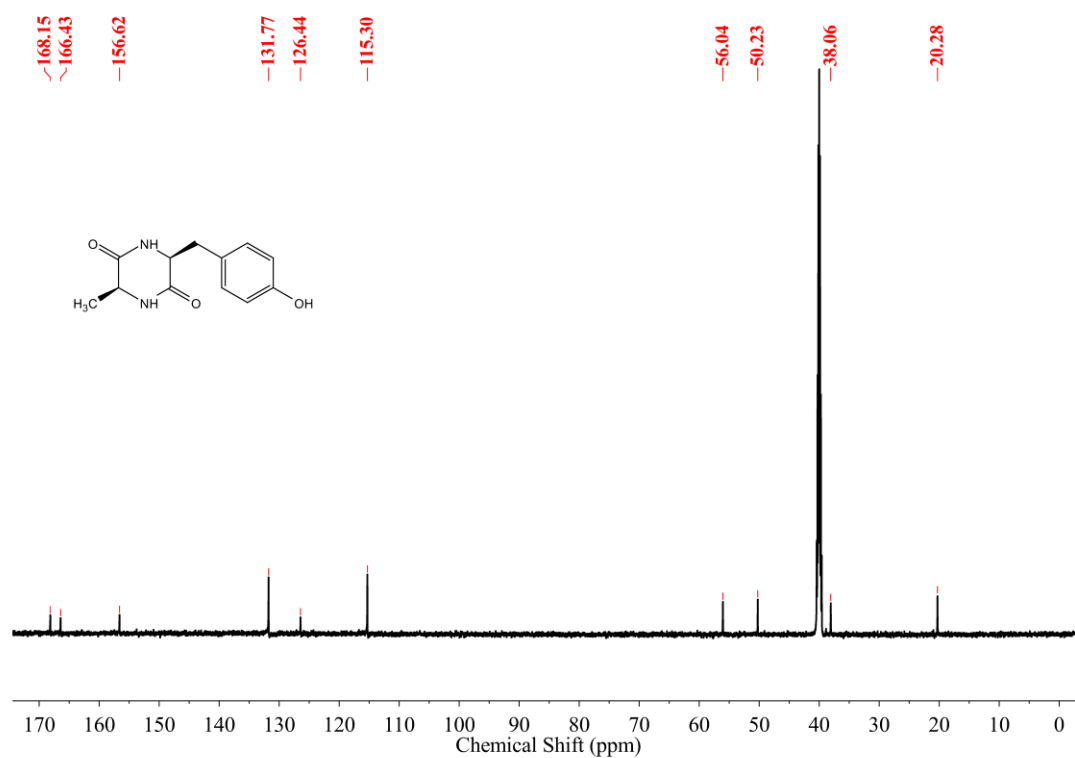

**Figure S45.** <sup>13</sup>C NMR spectrum of **19** (151 MHz, DMSO-*d*<sub>6</sub>).

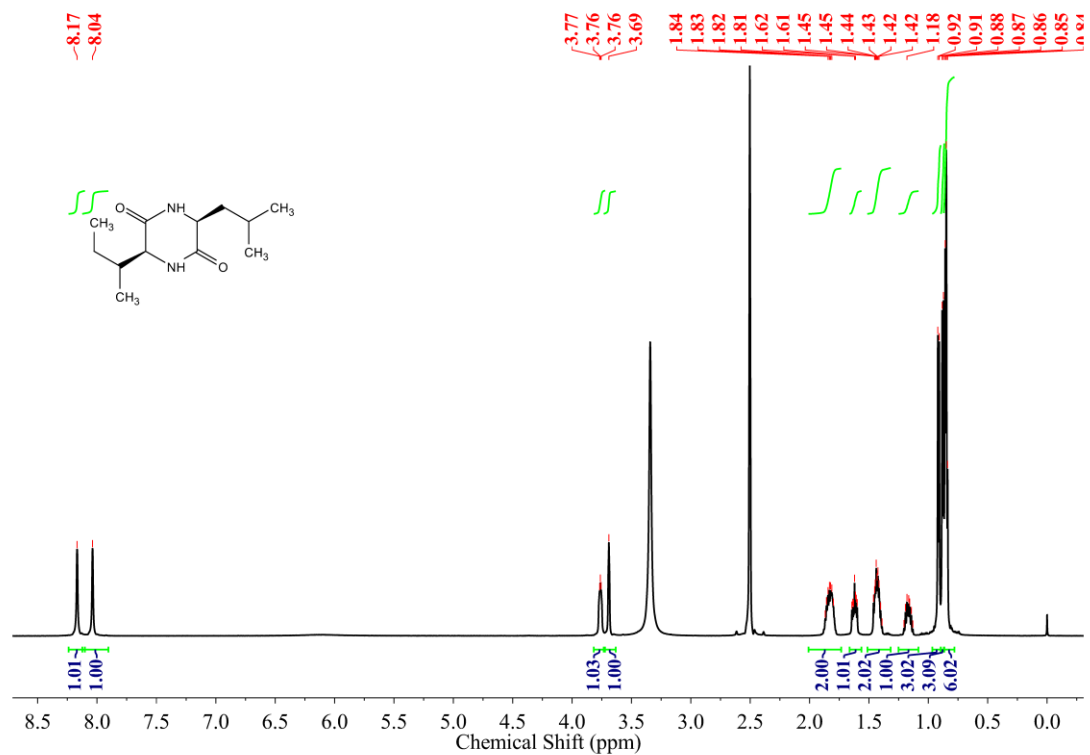

**Figure S46.** <sup>1</sup>H NMR spectrum of **20** (600 MHz, DMSO-*d*<sub>6</sub>).

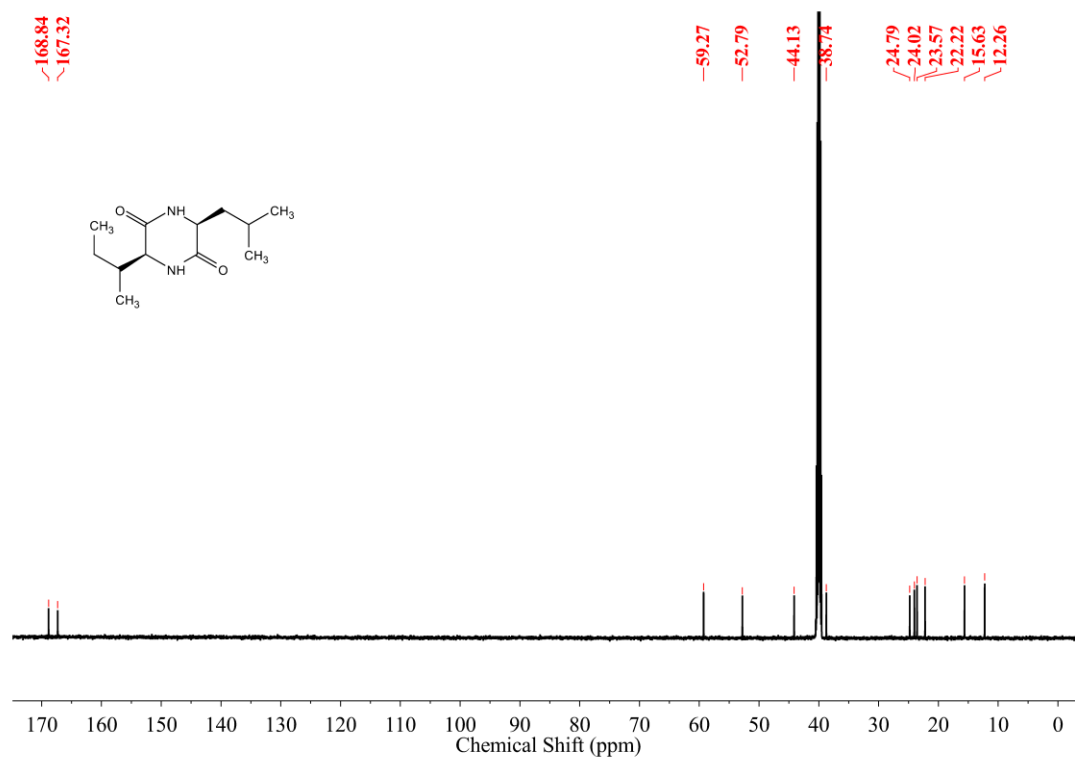

**Figure S47.** <sup>13</sup>C NMR spectrum of **20** (151 MHz, DMSO-*d*<sub>6</sub>).

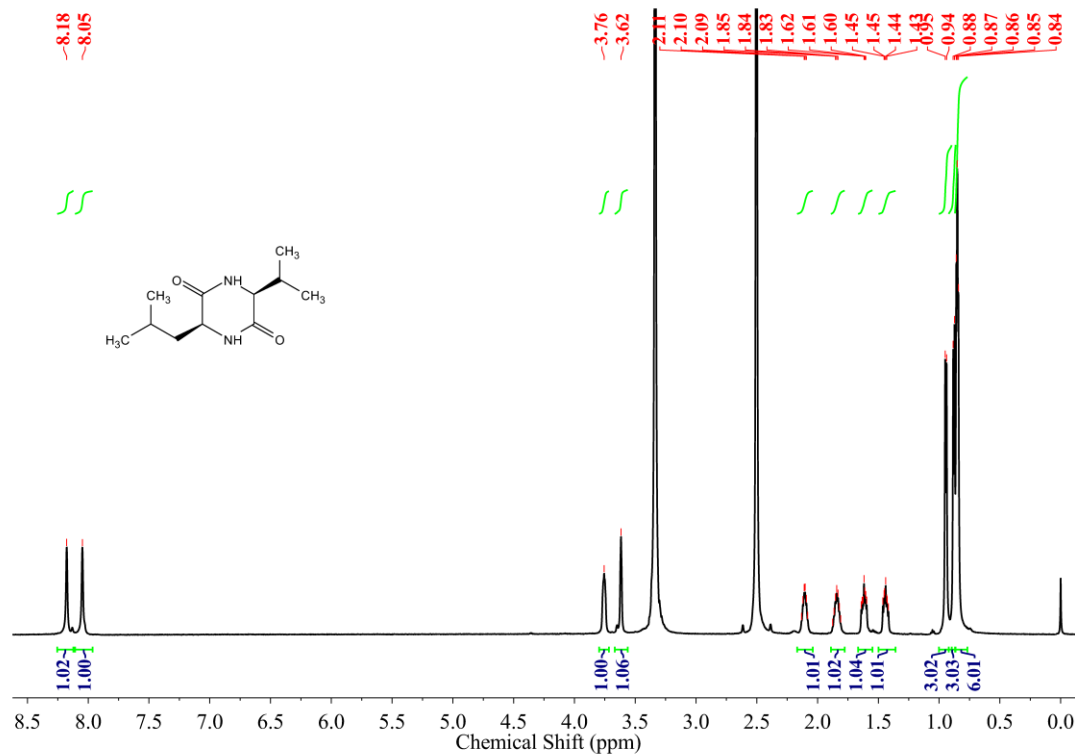

**Figure S48.** <sup>1</sup>H NMR spectrum of **21** (600 MHz, DMSO-*d*<sub>6</sub>).

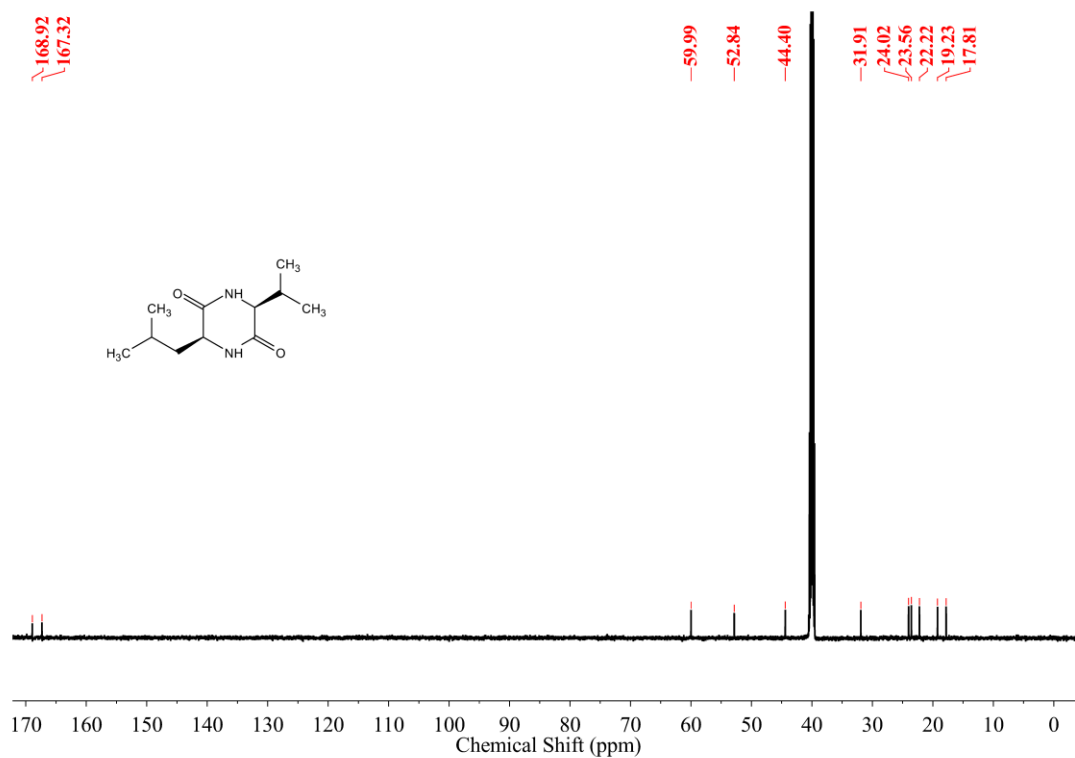

**Figure S49.** <sup>13</sup>C NMR spectrum of **21** (151 MHz, DMSO-*d*<sub>6</sub>).

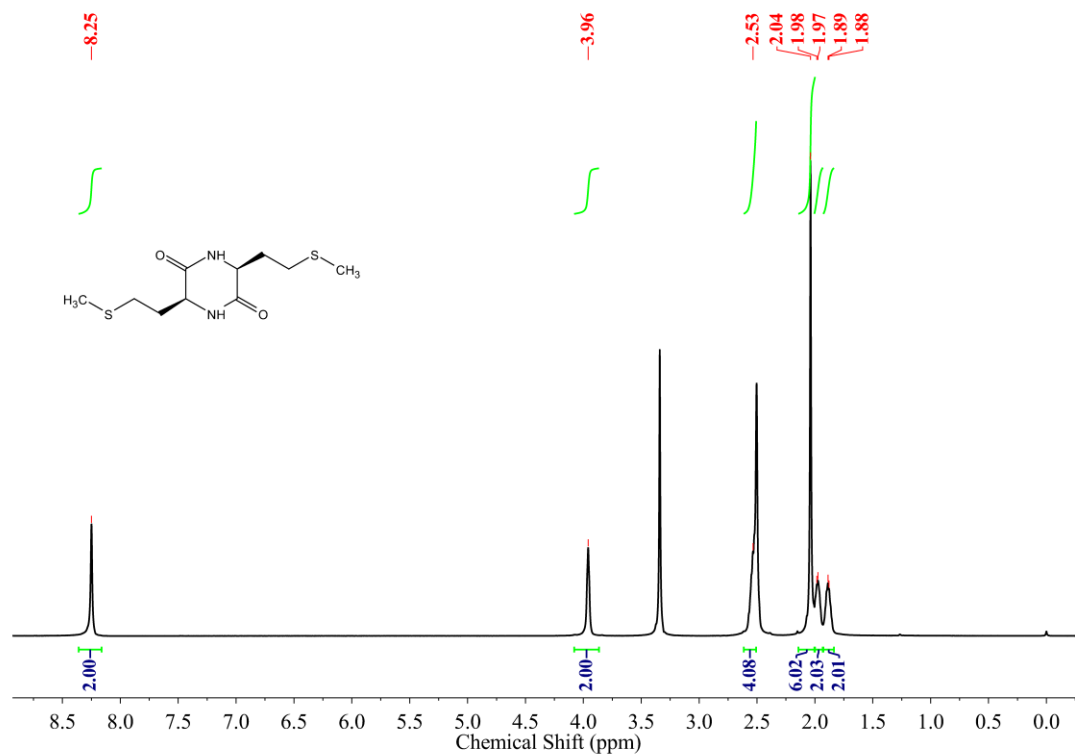

**Figure S50.**  $^1\text{H}$  NMR spectrum of **22** (600 MHz,  $\text{DMSO-}d_6$ ).

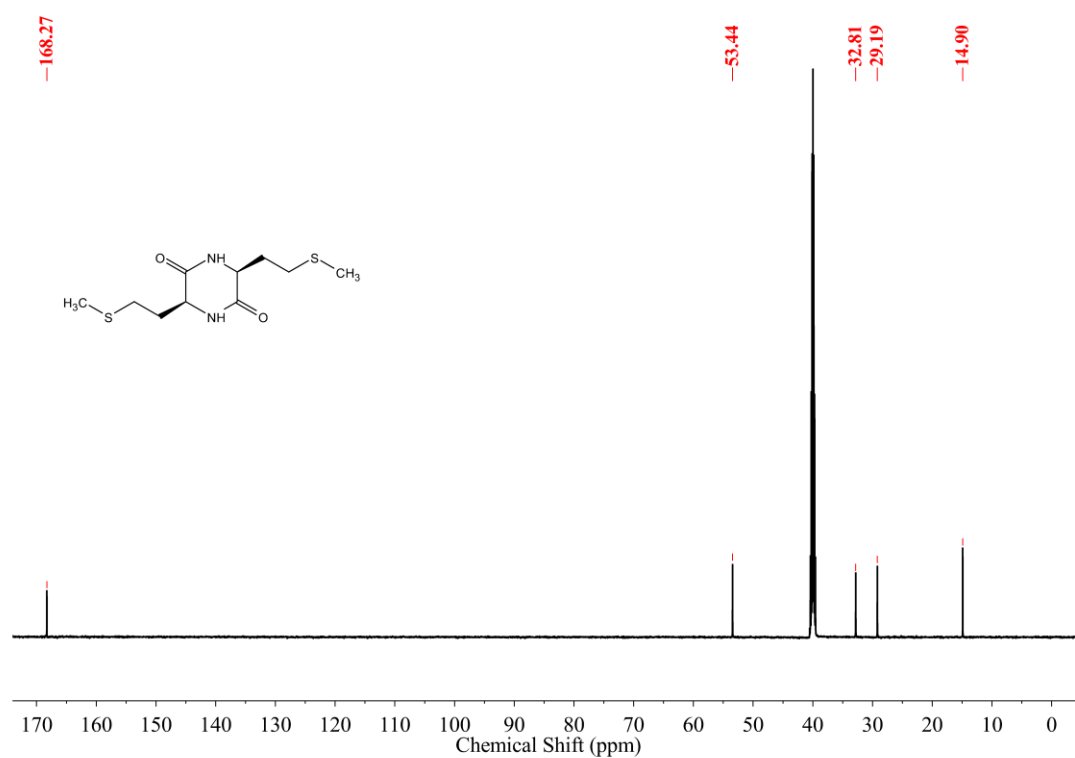

**Figure S51.**  $^{13}\text{C}$  NMR spectrum of **22** (151 MHz,  $\text{DMSO-}d_6$ ).

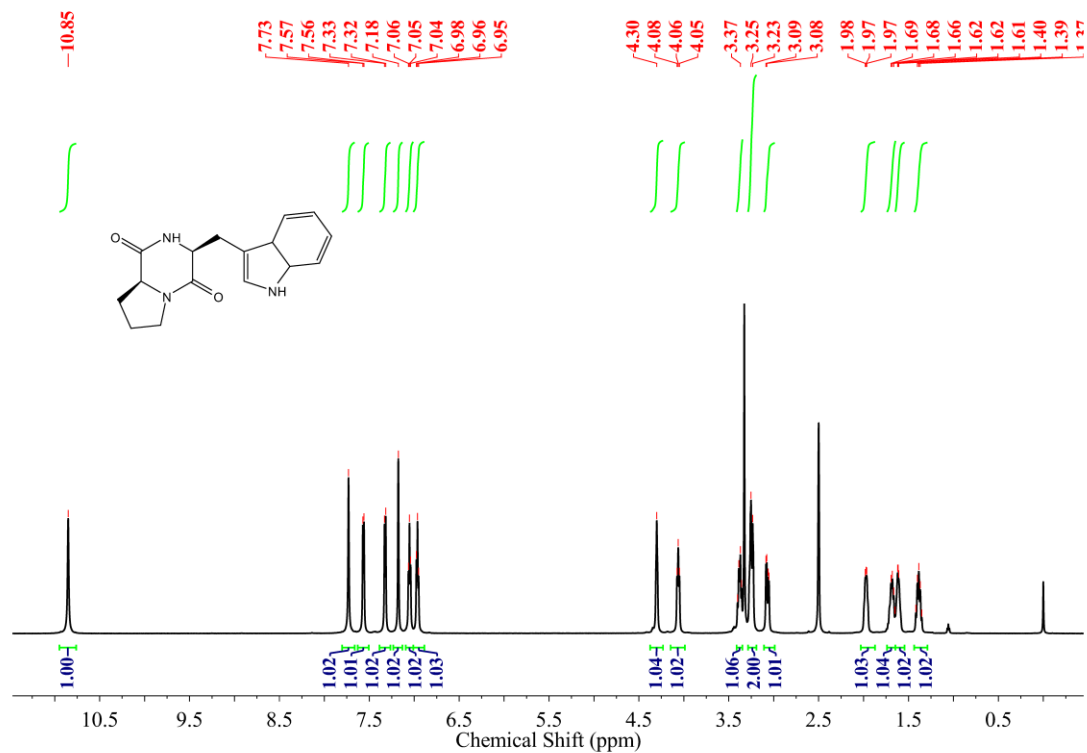

**Figure S52.**  $^1\text{H}$  NMR spectrum of **23** (600 MHz,  $\text{DMSO-}d_6$ ).

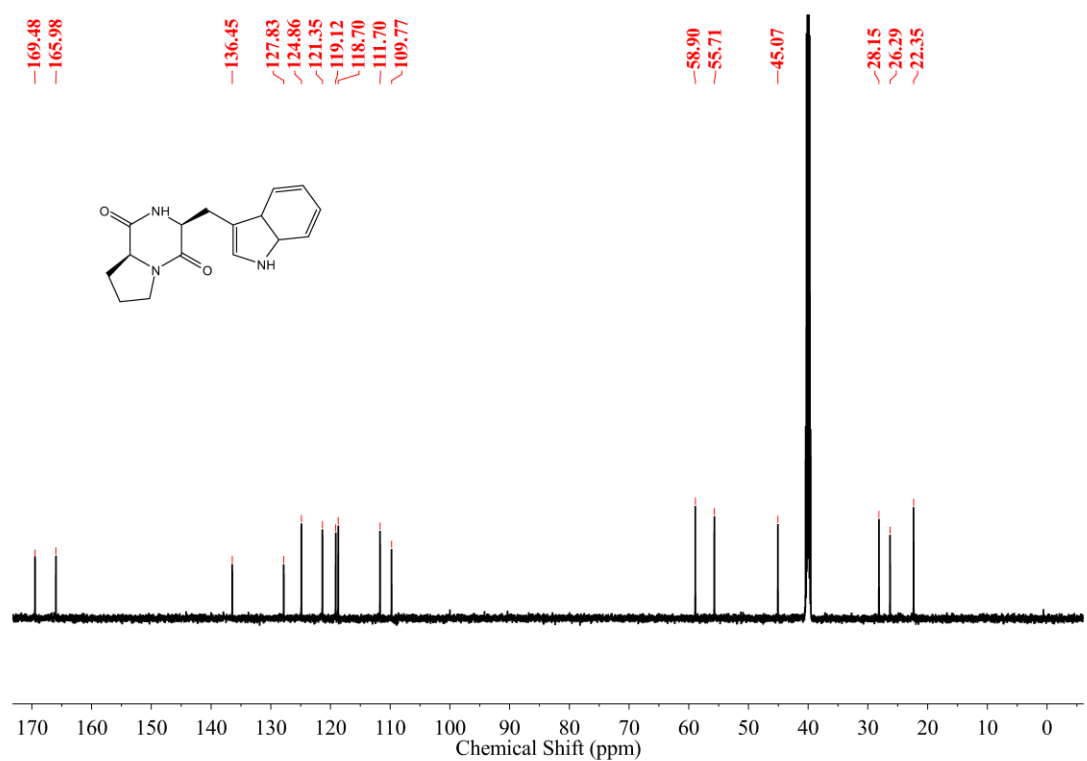

**Figure S53.**  $^{13}\text{C}$  NMR spectrum of **23** (151 MHz,  $\text{DMSO-}d_6$ ).

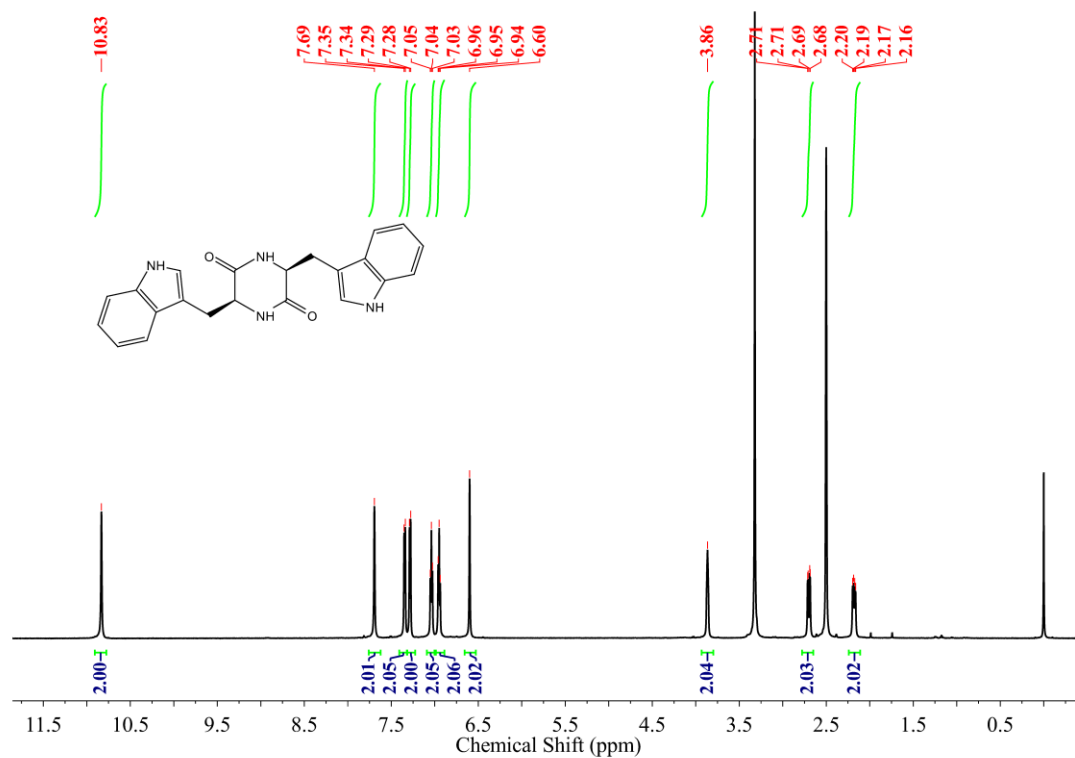

**Figure S54.**  $^1\text{H}$  NMR spectrum of **24** (600 MHz,  $\text{DMSO}-d_6$ ).

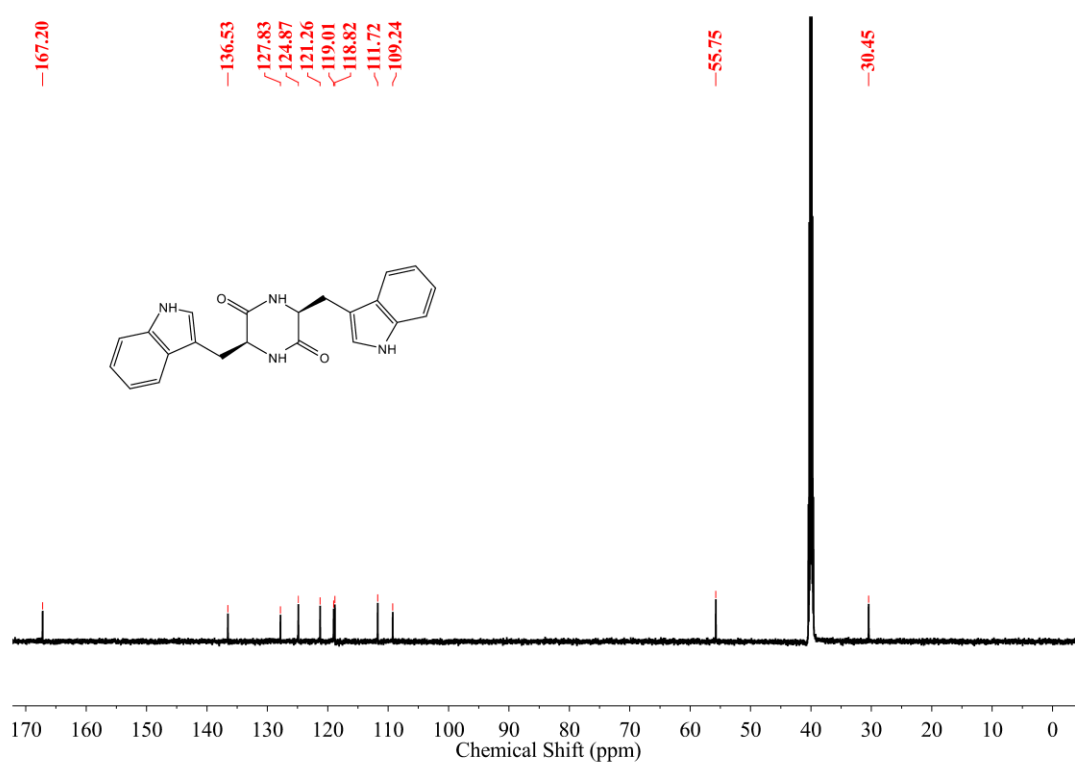

**Figure S55.**  $^{13}\text{C}$  NMR spectrum of **24** (151 MHz,  $\text{DMSO}-d_6$ ).

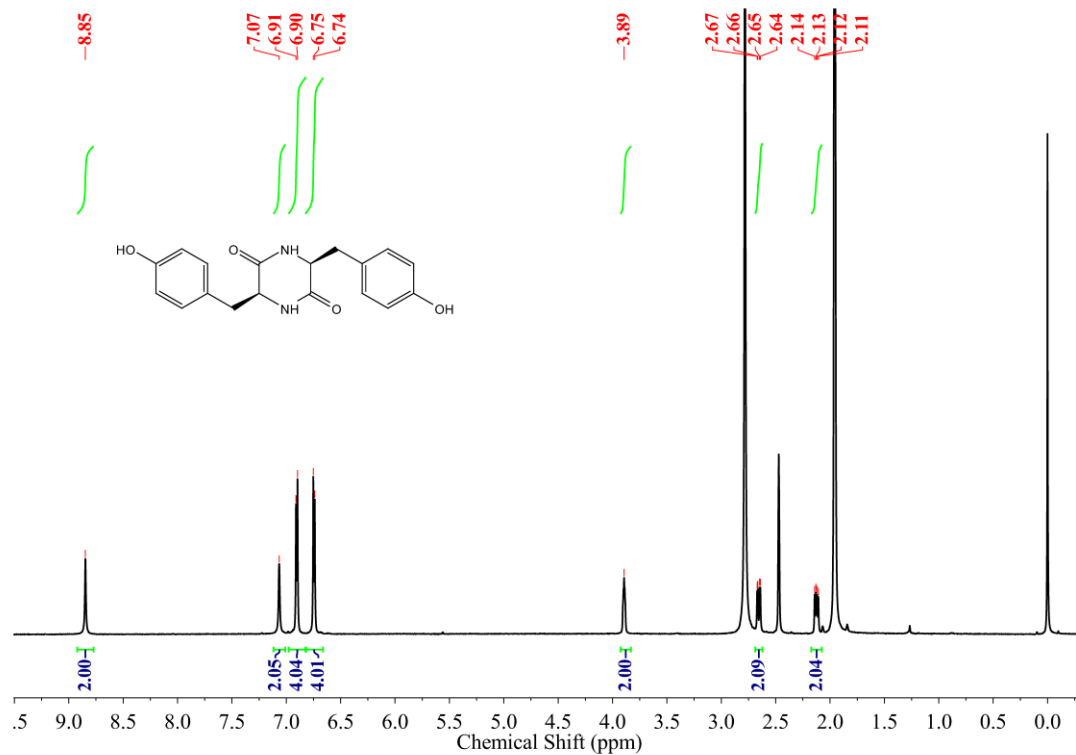

**Figure S56.**  $^1\text{H}$  NMR spectrum of **25** (600 MHz,  $\text{DMSO-}d_6/\text{CD}_3\text{CN}$ , v/v = 1/9).

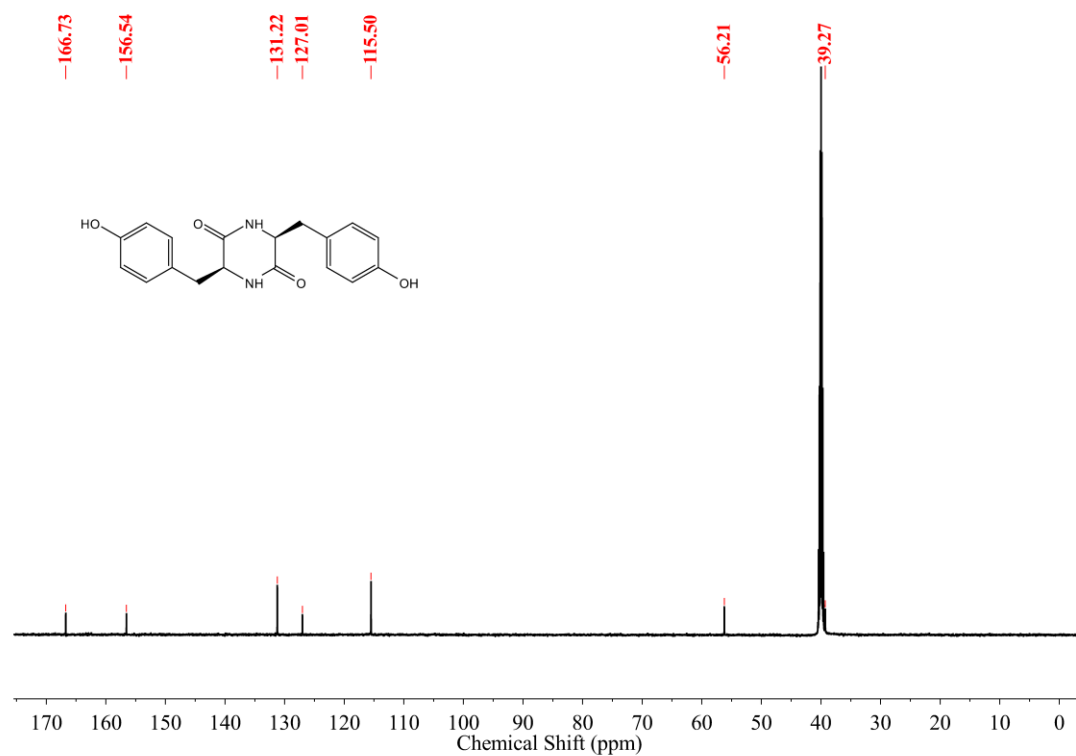

**Figure S57.**  $^{13}\text{C}$  NMR spectrum of **25** (151 MHz,  $\text{DMSO-}d_6$ ).

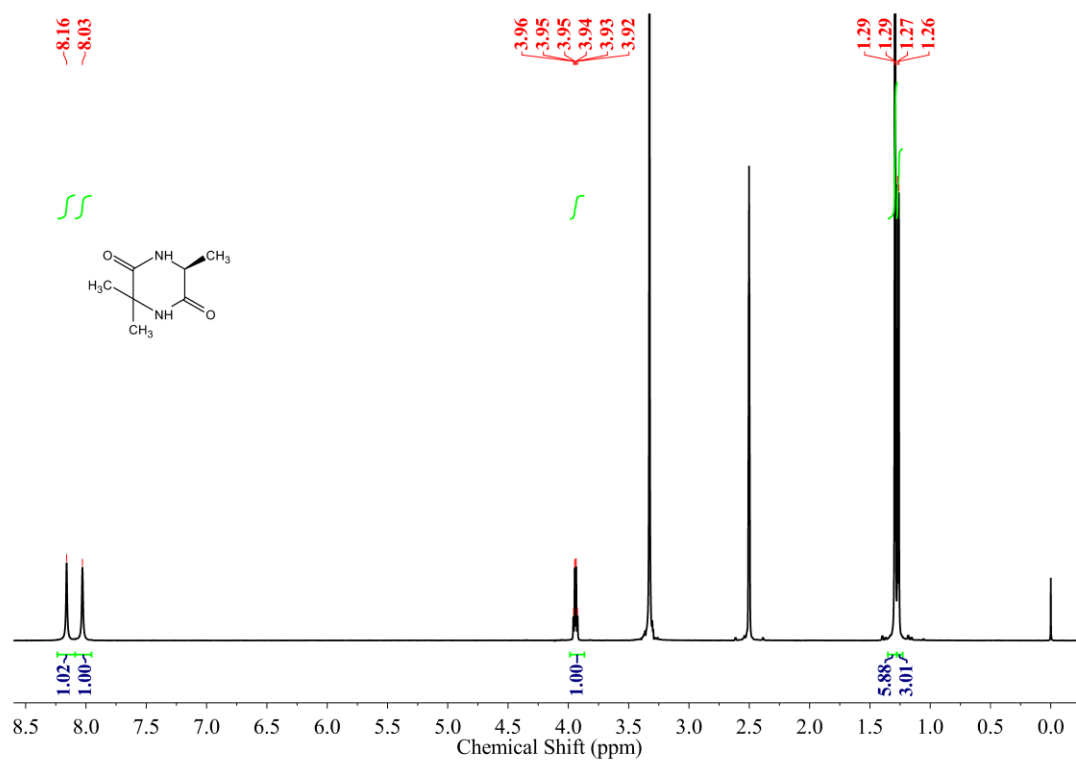

**Figure S58.**  $^1\text{H}$  NMR spectrum of **26** (600 MHz,  $\text{DMSO-}d_6$ ).

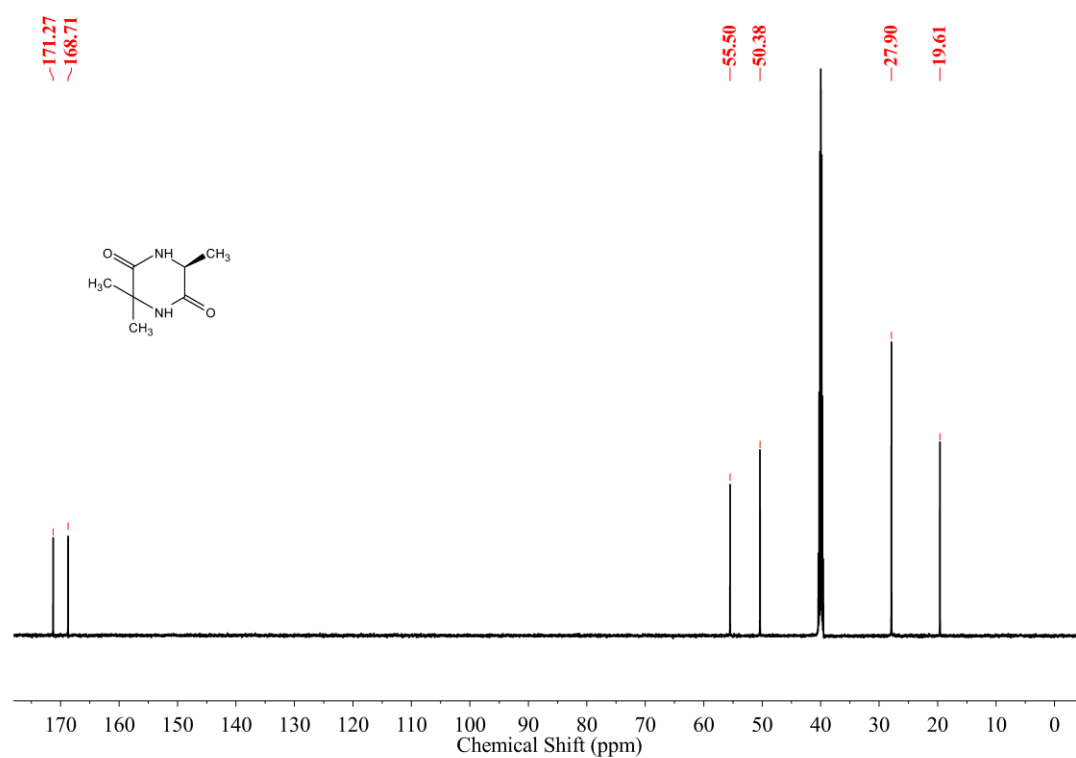

**Figure S59.**  $^{13}\text{C}$  NMR spectrum of **26** (151 MHz,  $\text{DMSO-}d_6$ ).

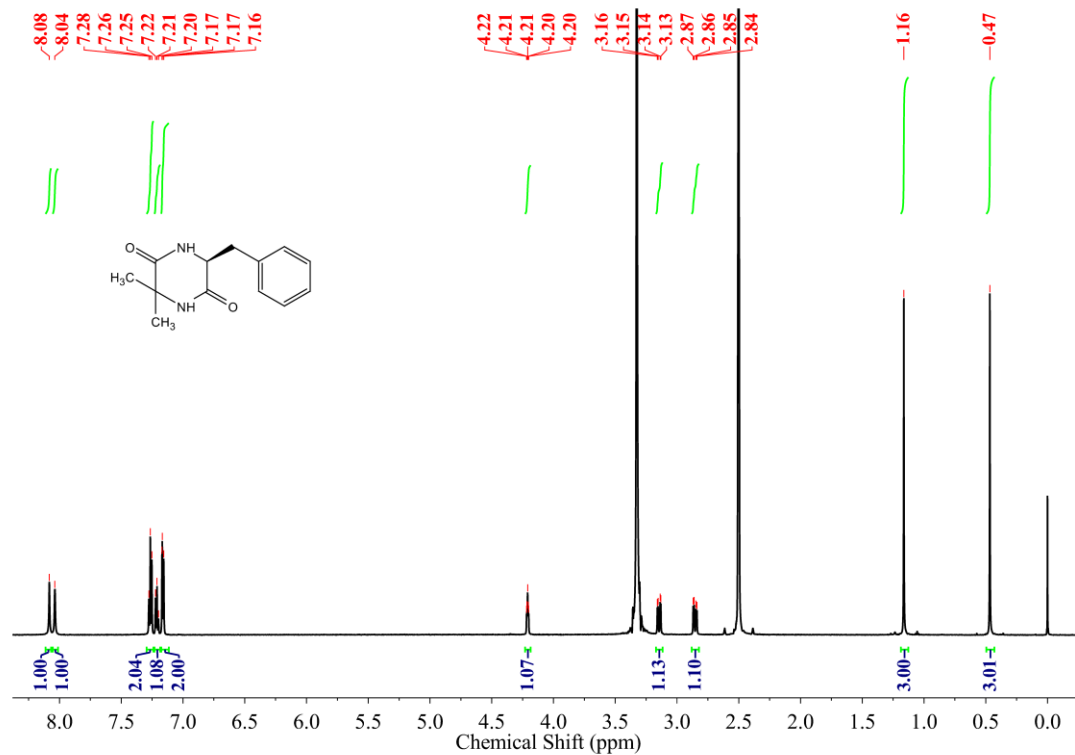

**Figure S60.** <sup>1</sup>H NMR spectrum of **27** (600 MHz, DMSO-*d*<sub>6</sub>).

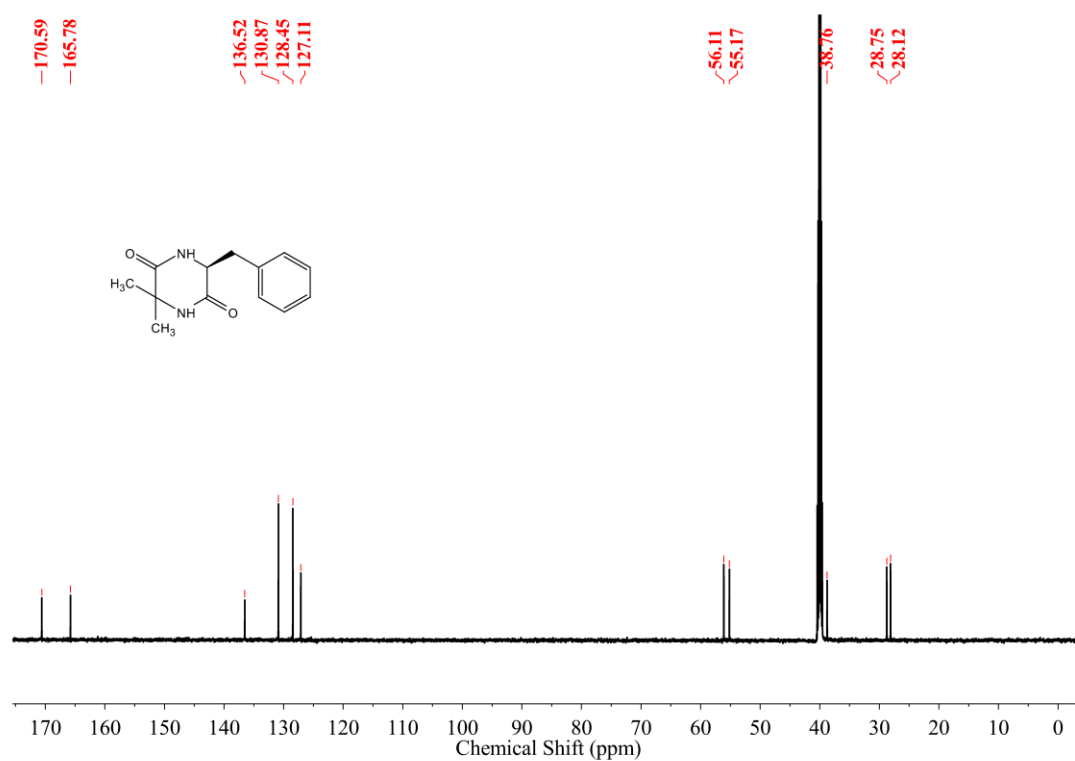

**Figure S61.** <sup>13</sup>C NMR spectrum of **27** (151 MHz, DMSO-*d*<sub>6</sub>).

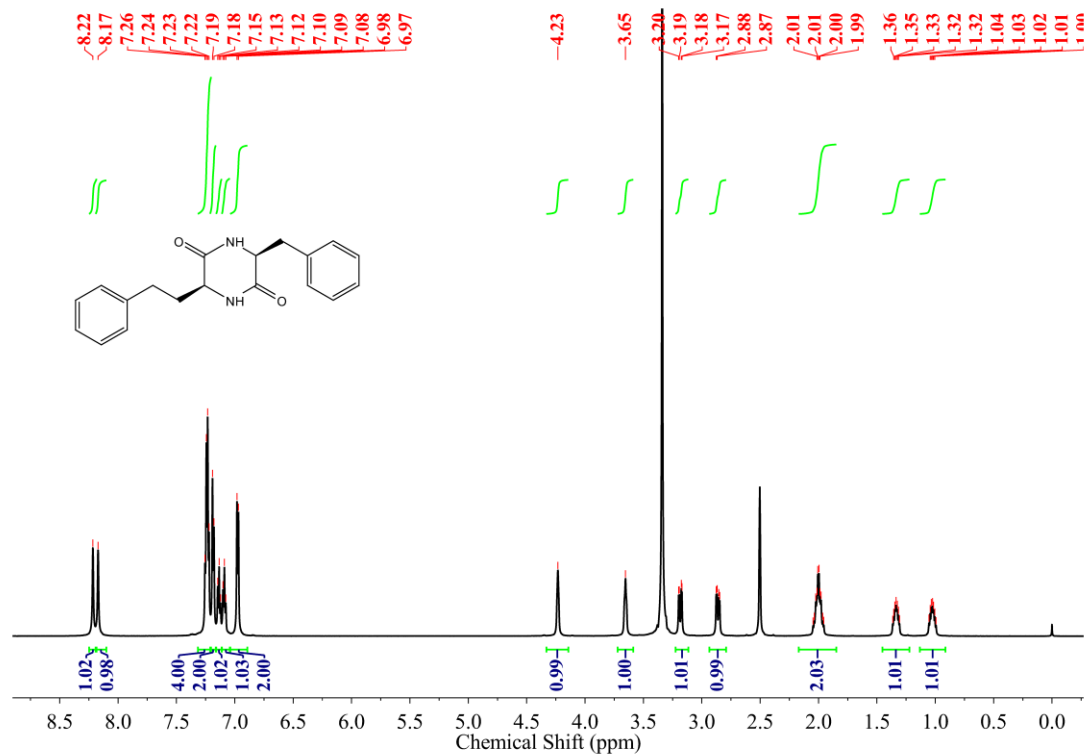

**Figure S62.** <sup>1</sup>H NMR spectrum of **28** (600 MHz, DMSO-*d*<sub>6</sub>).

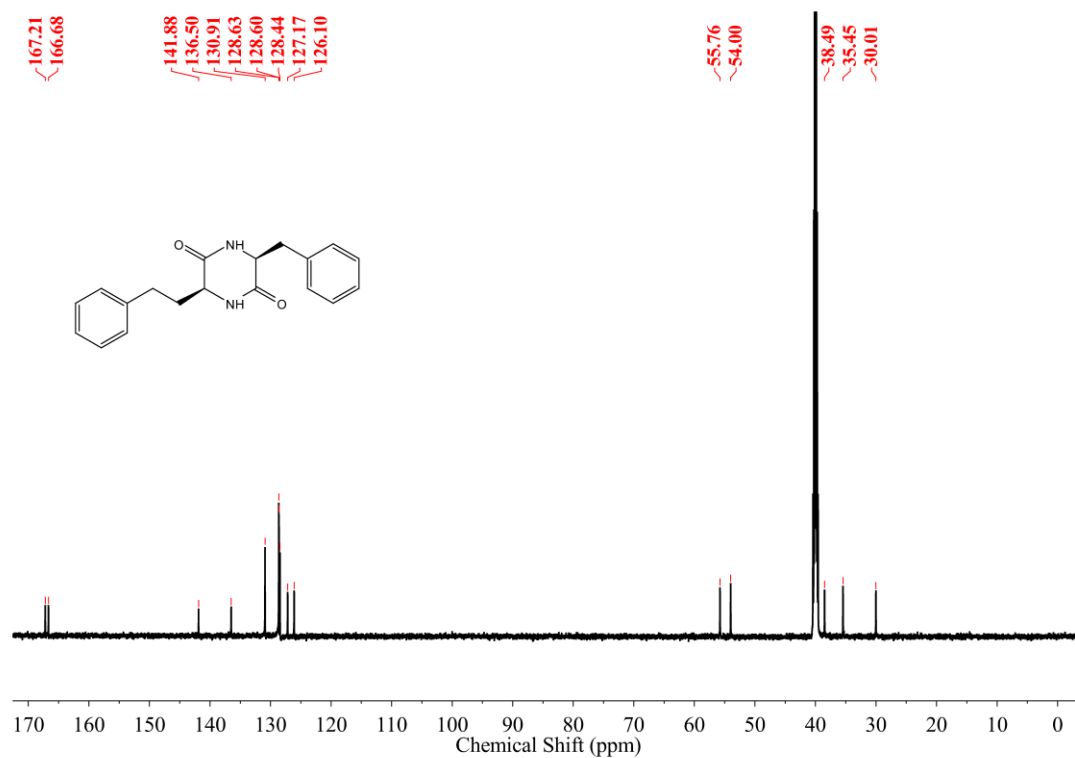

**Figure S63.** <sup>13</sup>C NMR spectrum of **28** (151 MHz, DMSO-*d*<sub>6</sub>).

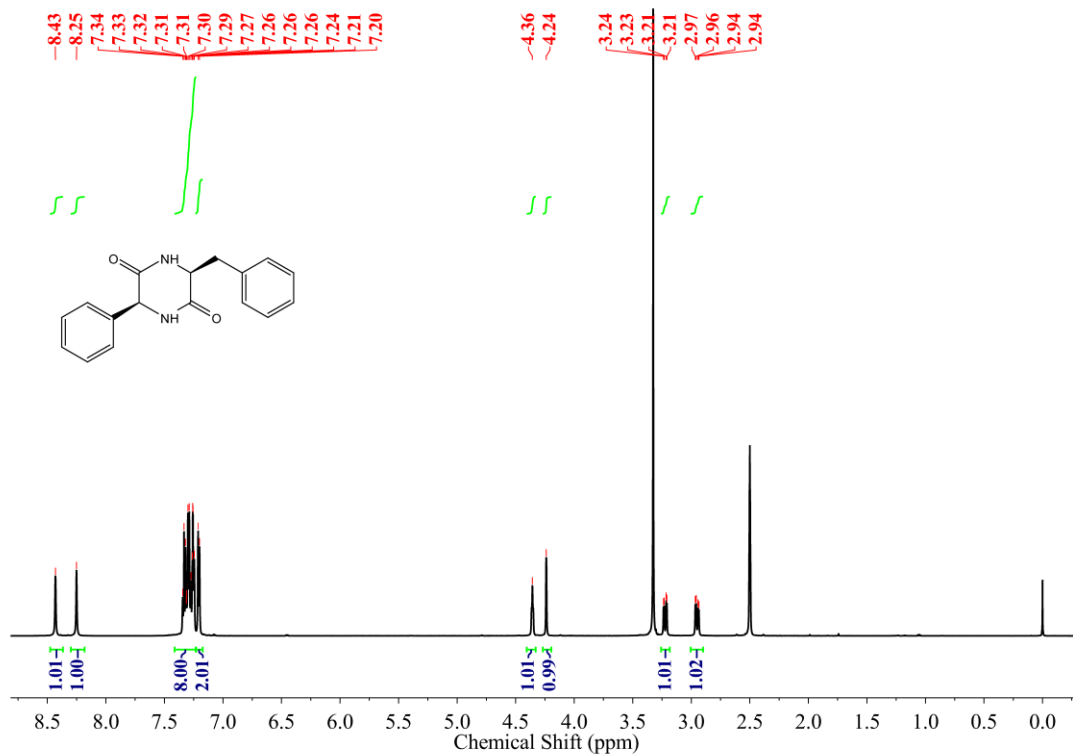

**Figure S64.** <sup>1</sup>H NMR spectrum of **29** (600 MHz, DMSO-*d*<sub>6</sub>).

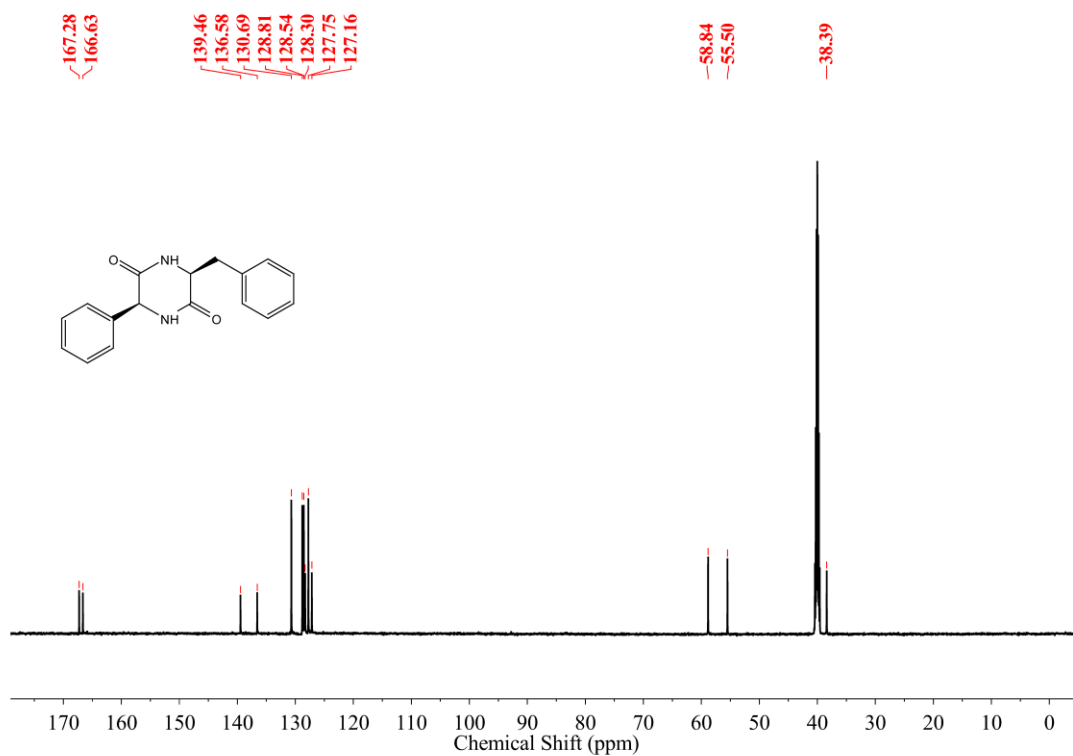

**Figure S65.** <sup>13</sup>C NMR spectrum of **29** (151 MHz, DMSO-*d*<sub>6</sub>).

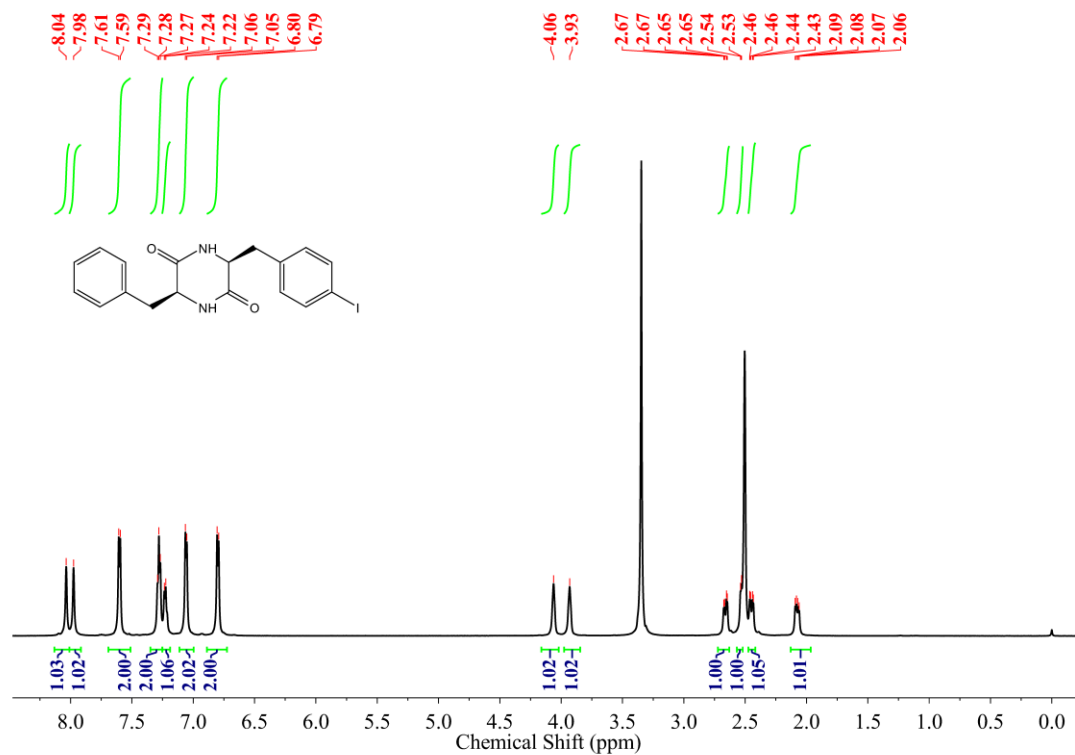

**Figure S66.**  $^1\text{H}$  NMR spectrum of **30** (600 MHz,  $\text{DMSO-}d_6$ ).

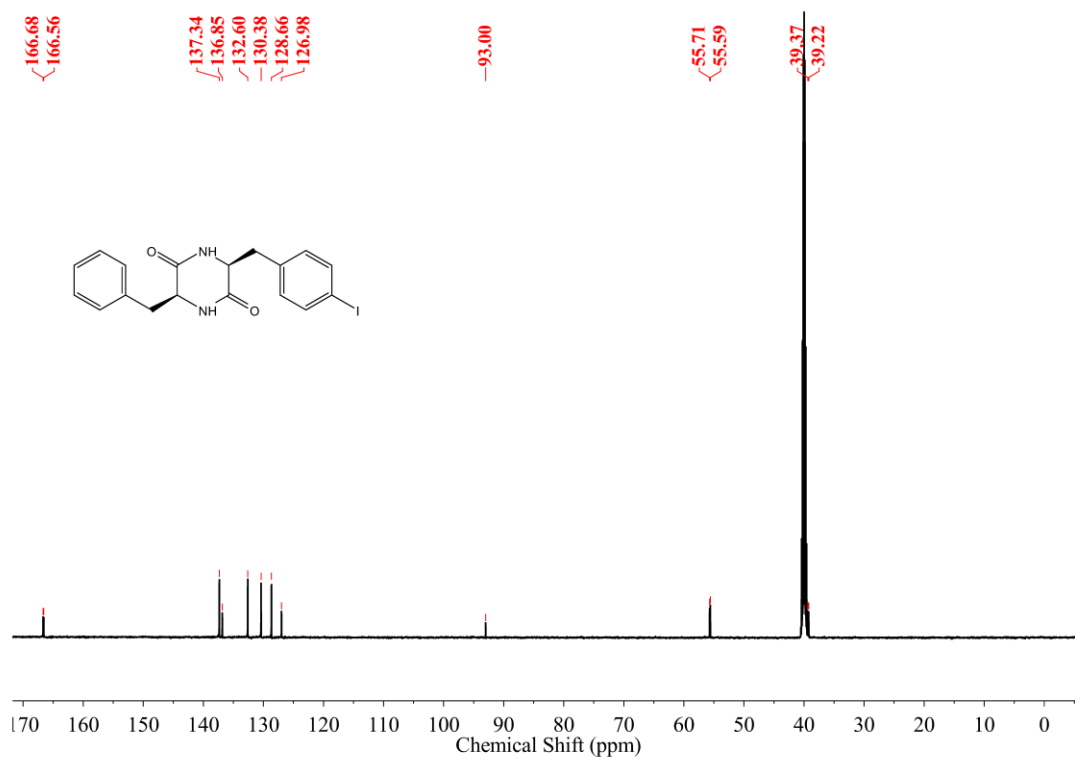

**Figure S67.**  $^{13}\text{C}$  NMR spectrum of **30** (151 MHz,  $\text{DMSO-}d_6$ ).

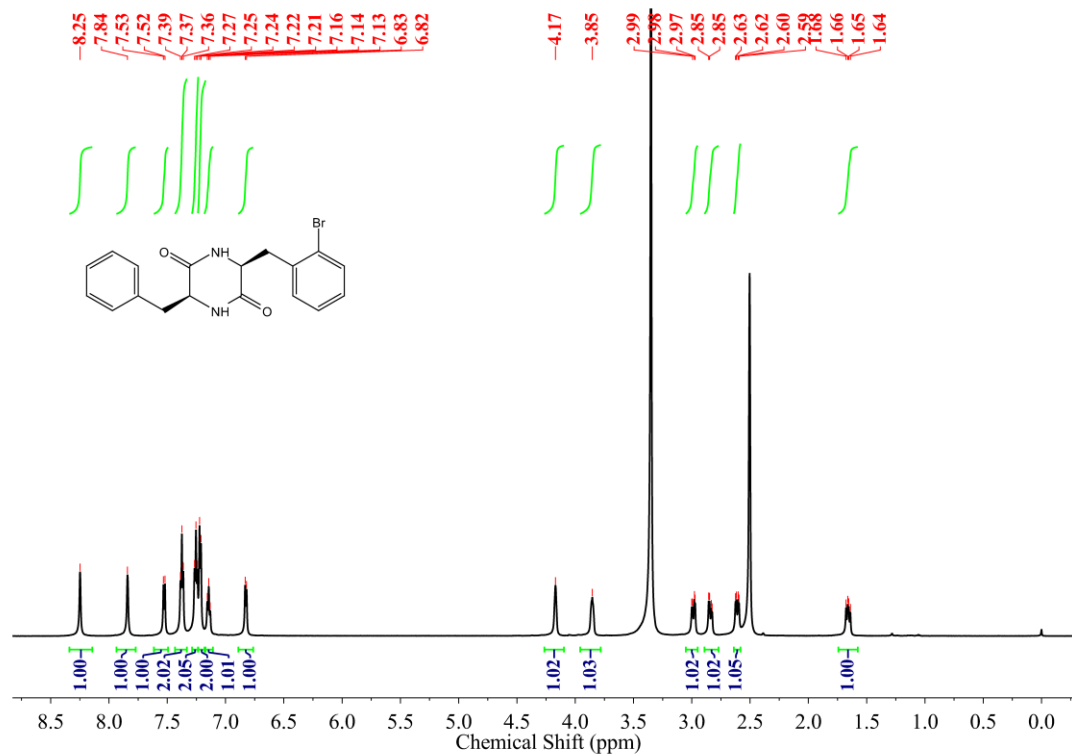

**Figure S68.**  $^1\text{H}$  NMR spectrum of **31** (600 MHz,  $\text{DMSO-}d_6$ ).

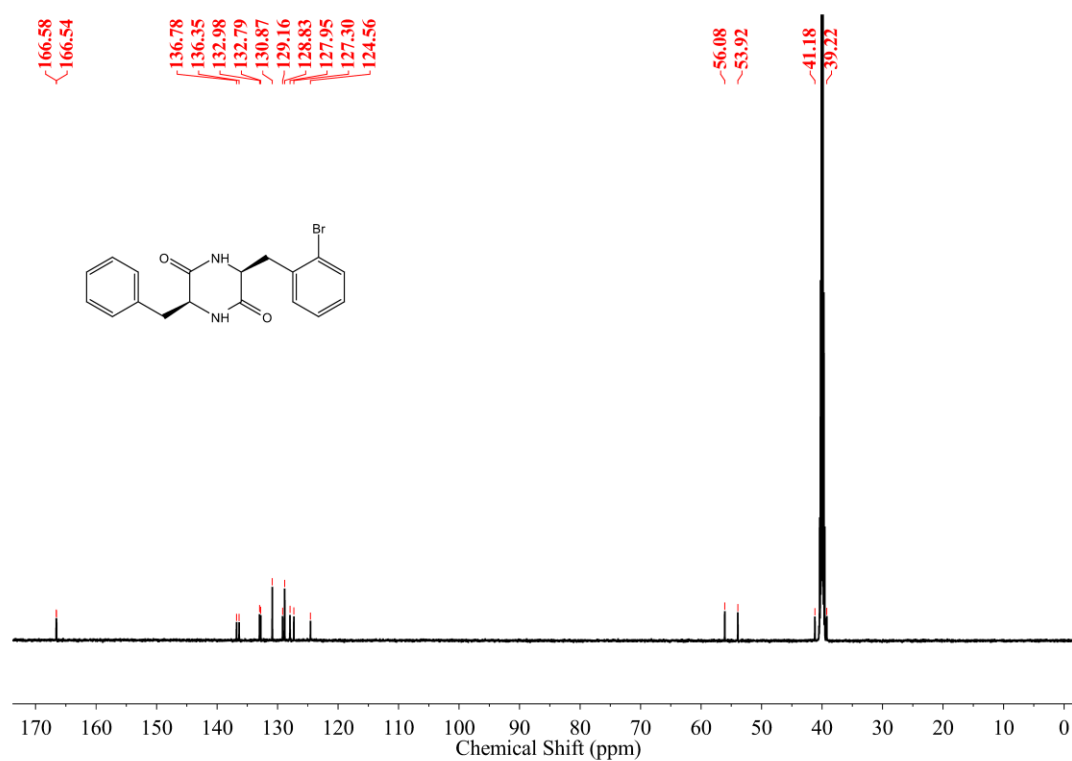

**Figure S69.**  $^{13}\text{C}$  NMR spectrum of **31** (151 MHz,  $\text{DMSO-}d_6$ ).

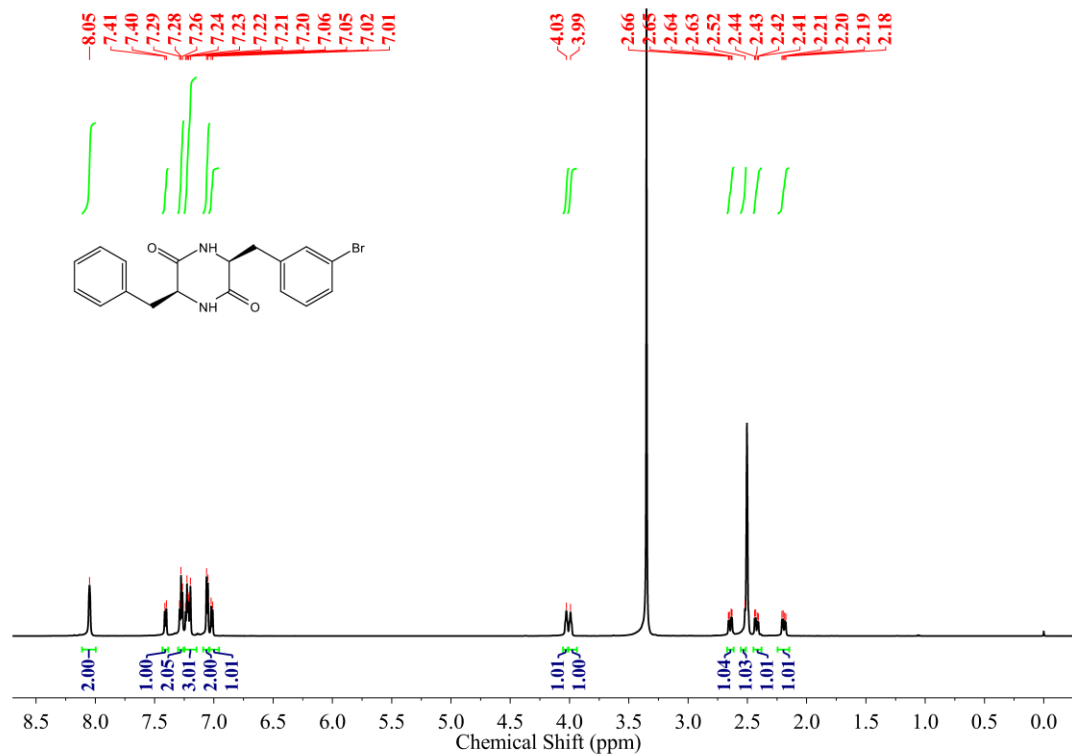

**Figure S70.**  $^1\text{H}$  NMR spectrum of **32** (600 MHz,  $\text{DMSO-}d_6$ ).

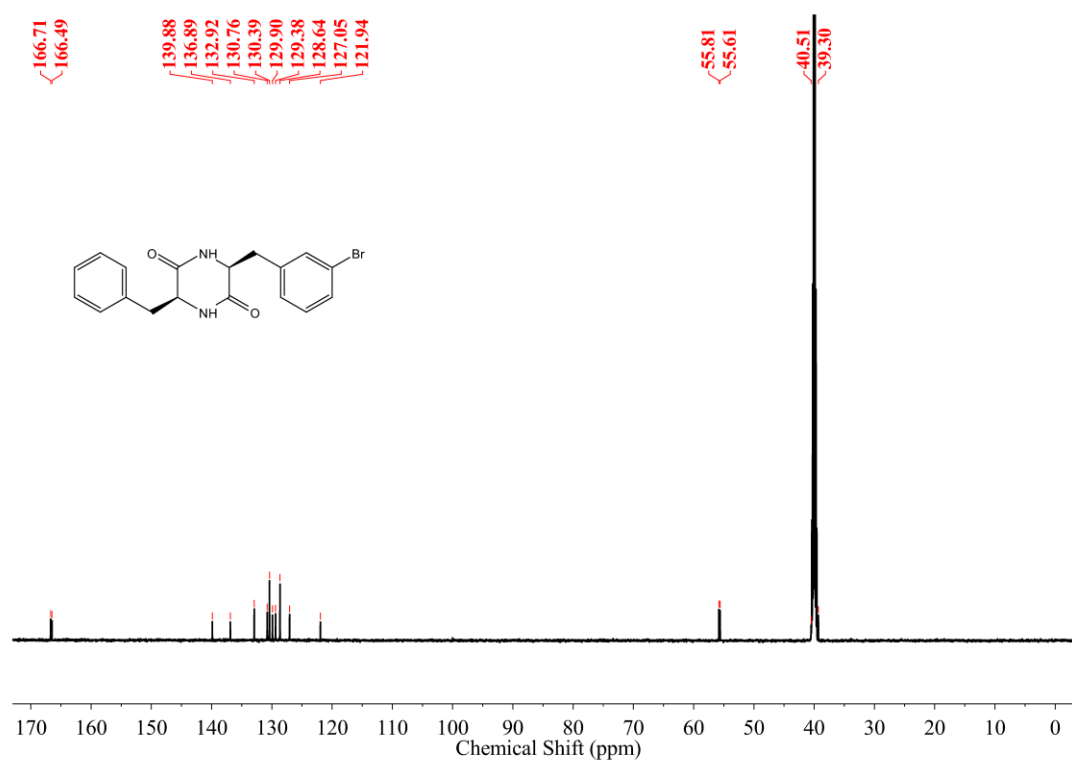

**Figure S71.**  $^{13}\text{C}$  NMR spectrum of **32** (151 MHz,  $\text{DMSO-}d_6$ ).

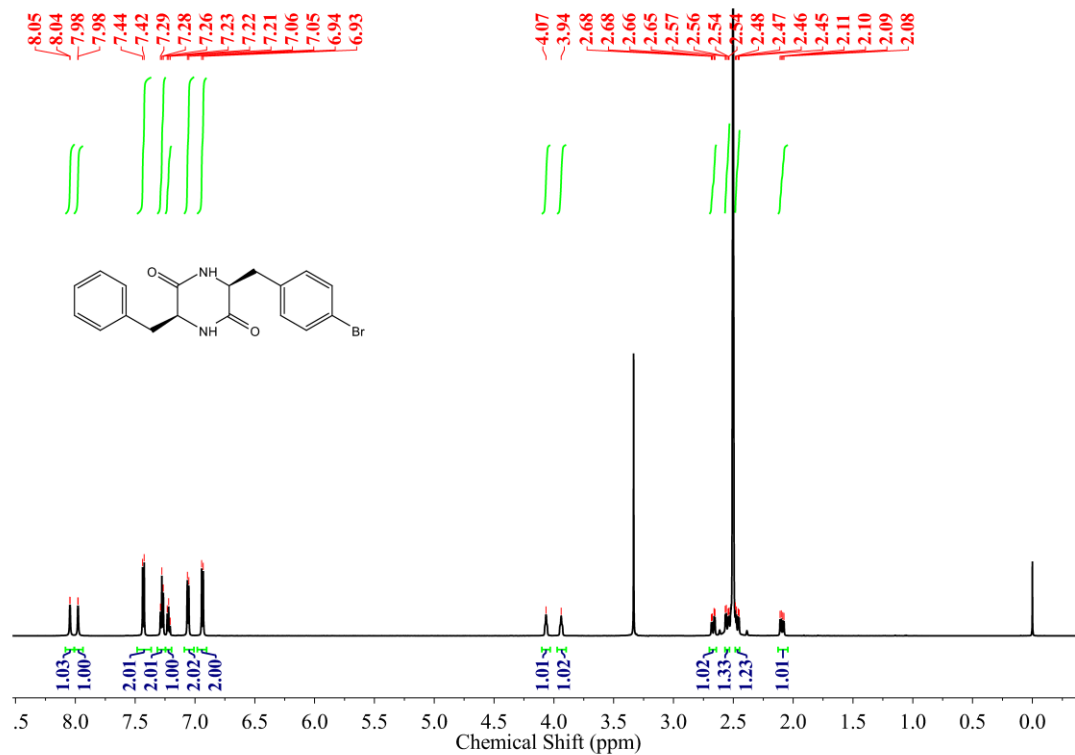

**Figure S72.**  $^1\text{H}$  NMR spectrum of **33** (600 MHz,  $\text{DMSO-}d_6$ ).

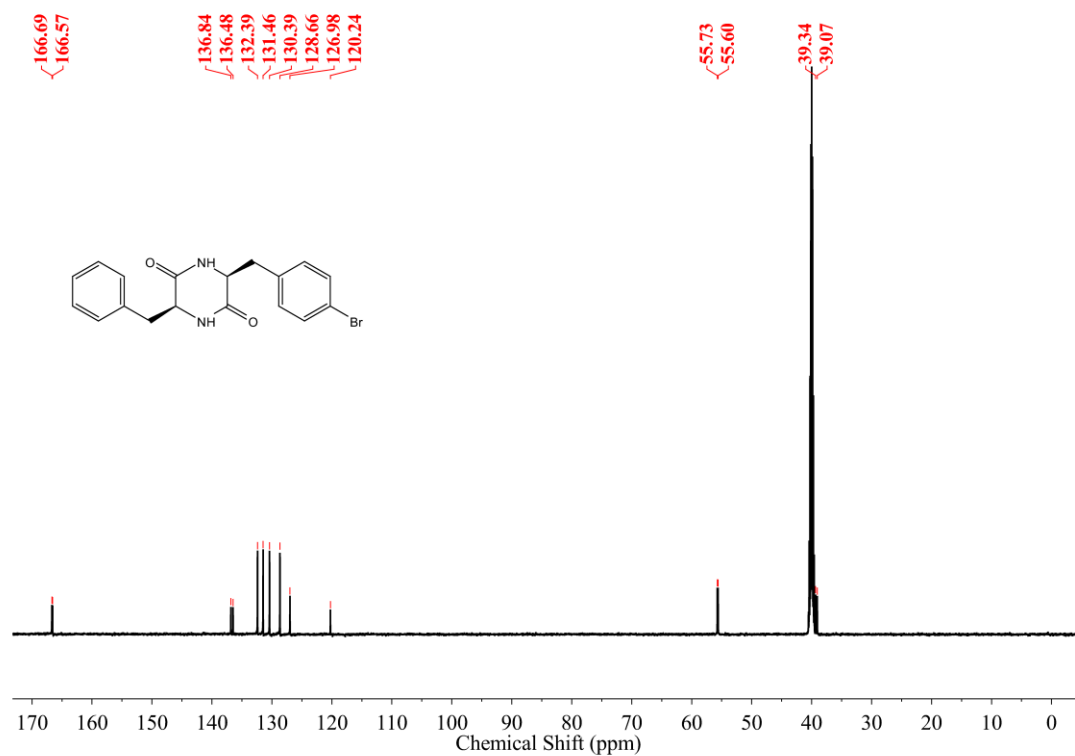

**Figure S73.**  $^{13}\text{C}$  NMR spectrum of **33** (151 MHz,  $\text{DMSO-}d_6$ ).

## 6. HRMS spectra

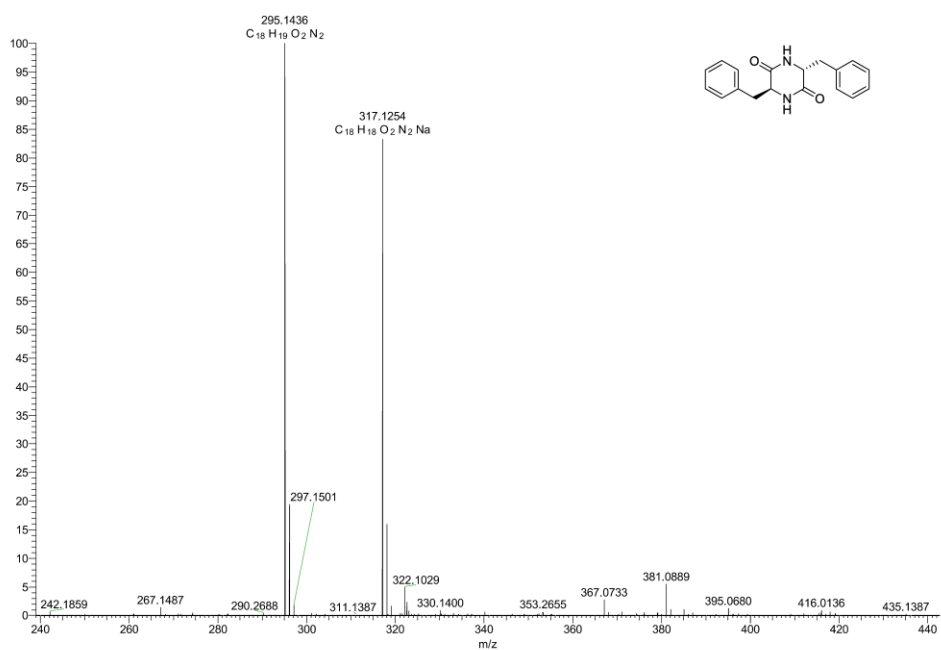

Figure S74. HRMS spectrum of 2.

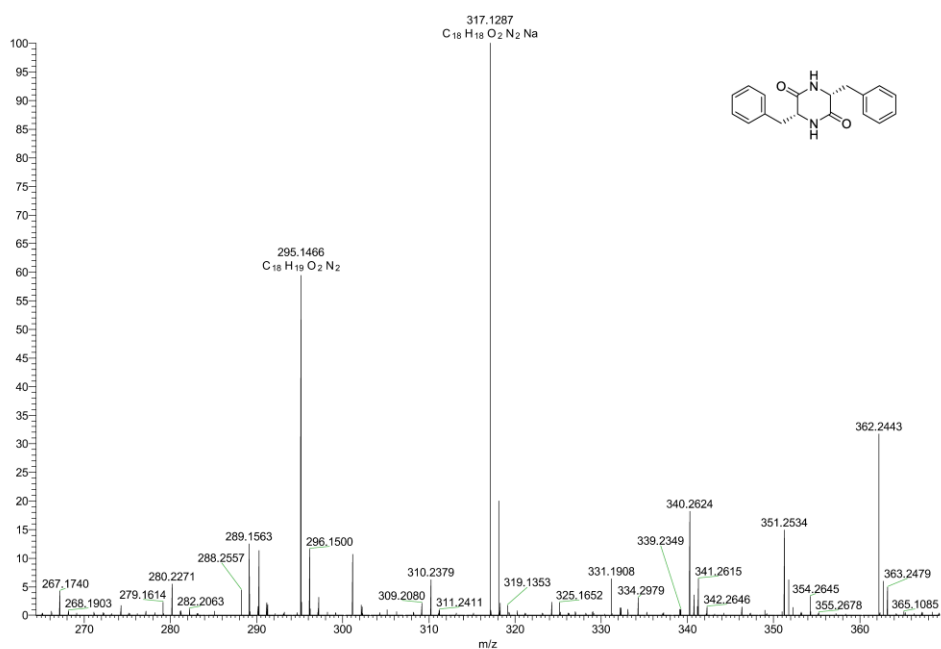

Figure S75. HRMS spectrum of 3.

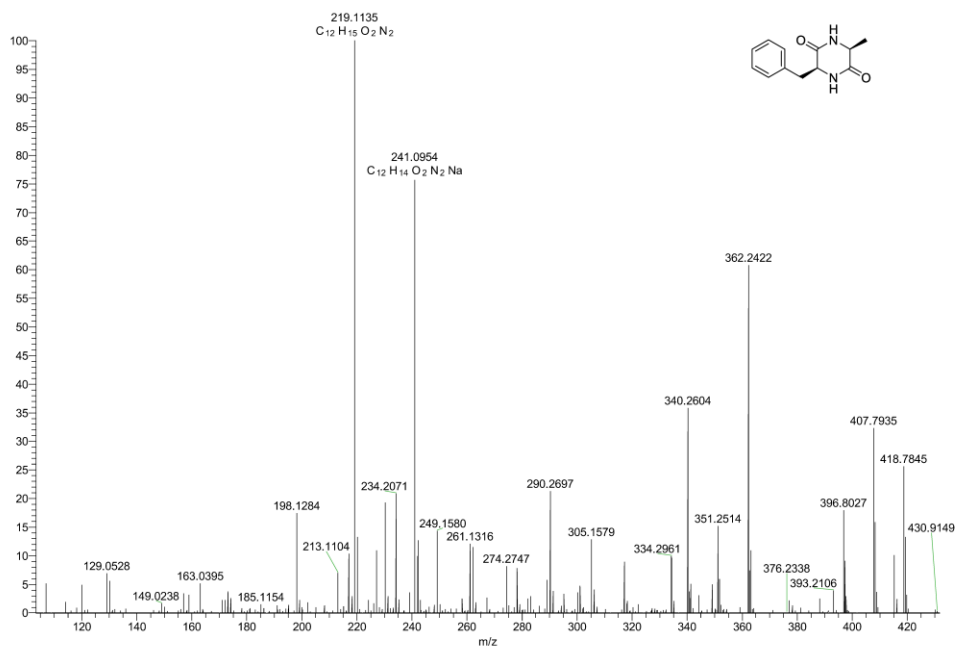

Figure S76. HRMS spectrum of 4.

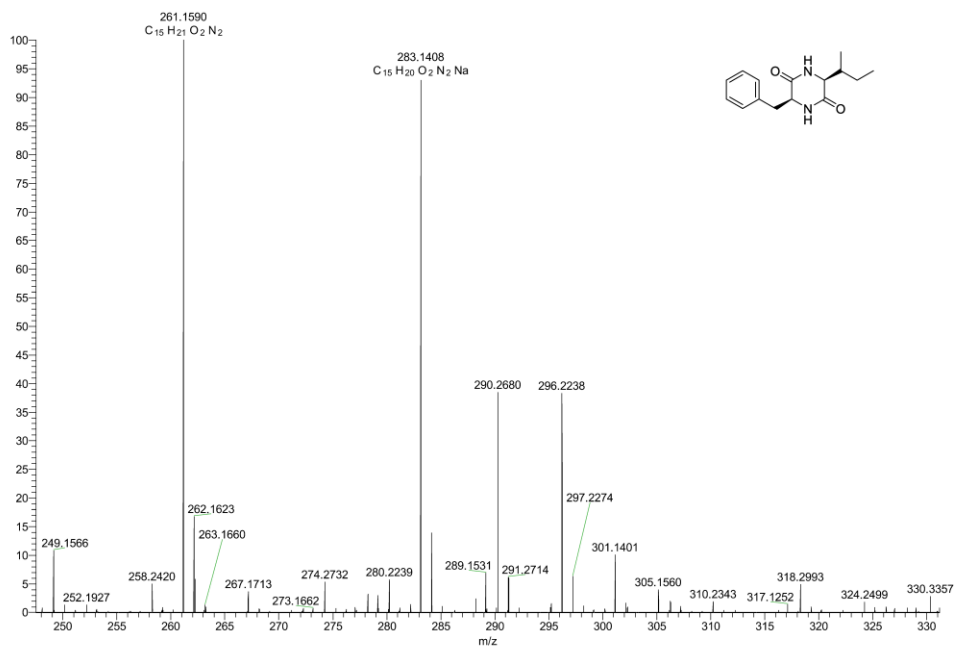

Figure S77. HRMS spectrum of 5.

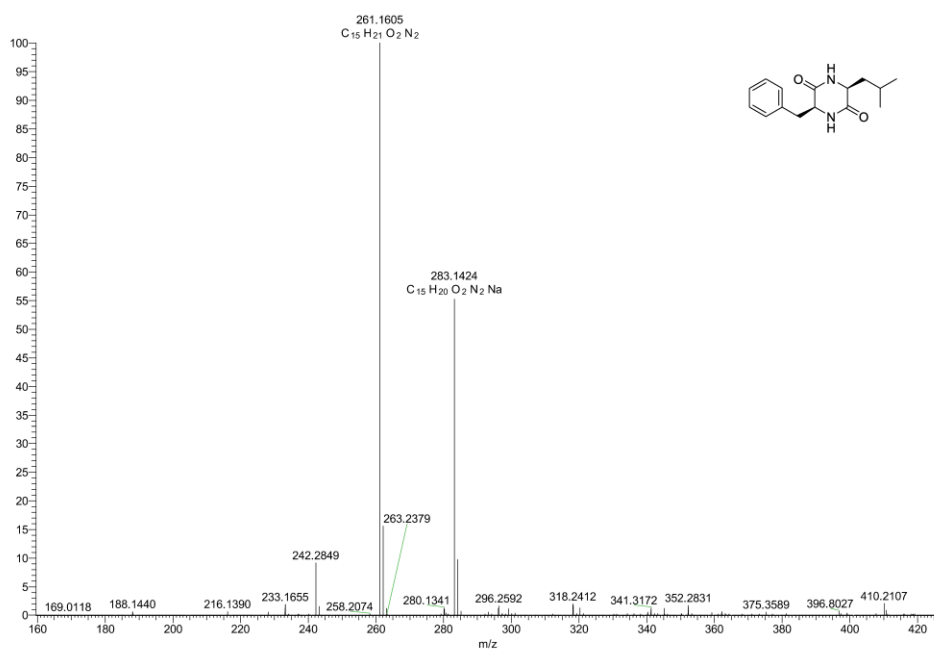

**Figure S78.** HRMS spectrum of 6.

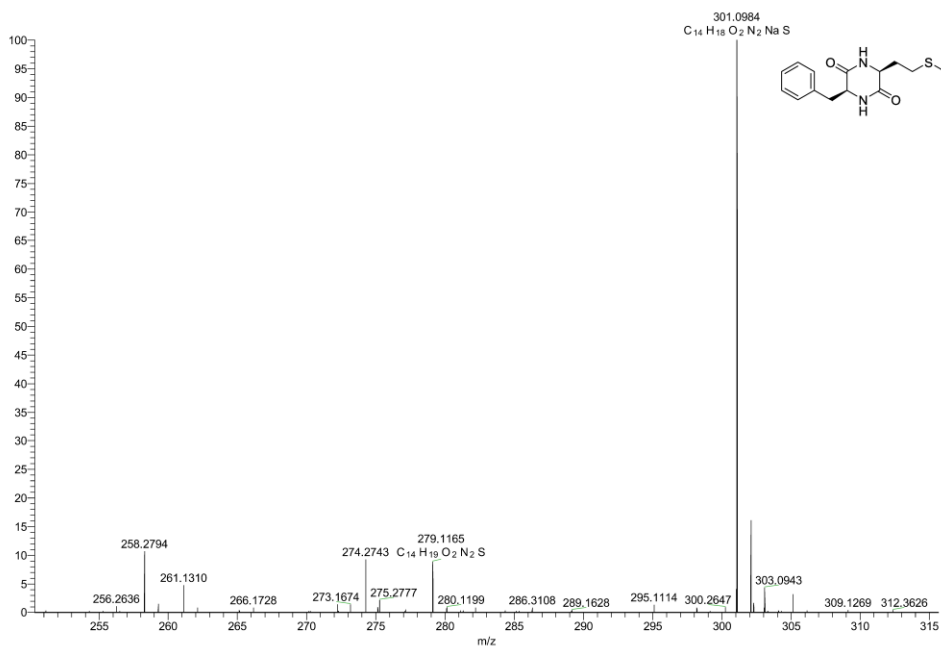

**Figure S79.** HRMS spectrum of 7.

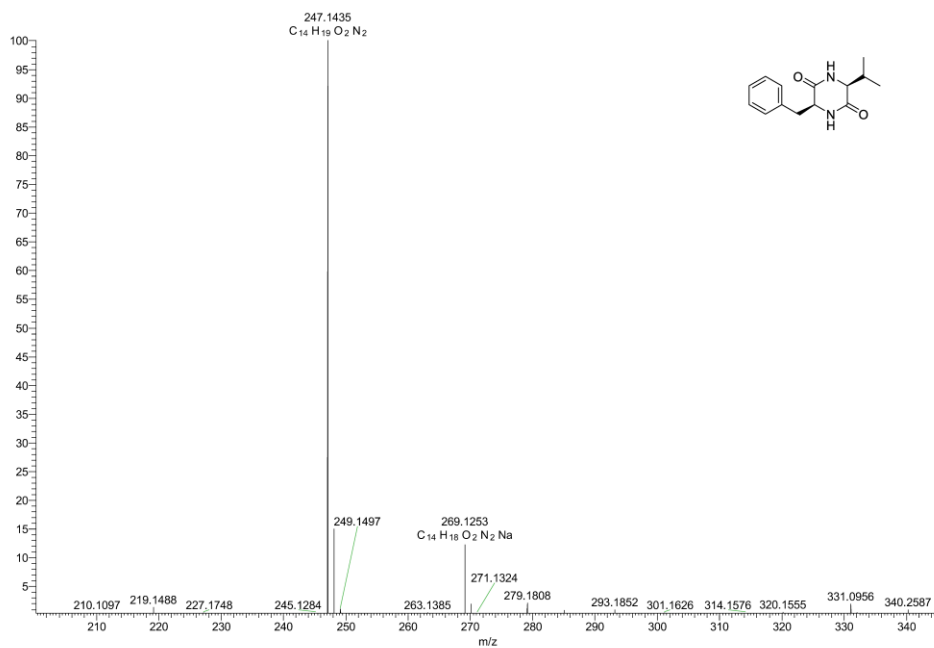

**Figure S80.** HRMS spectrum of **8**.

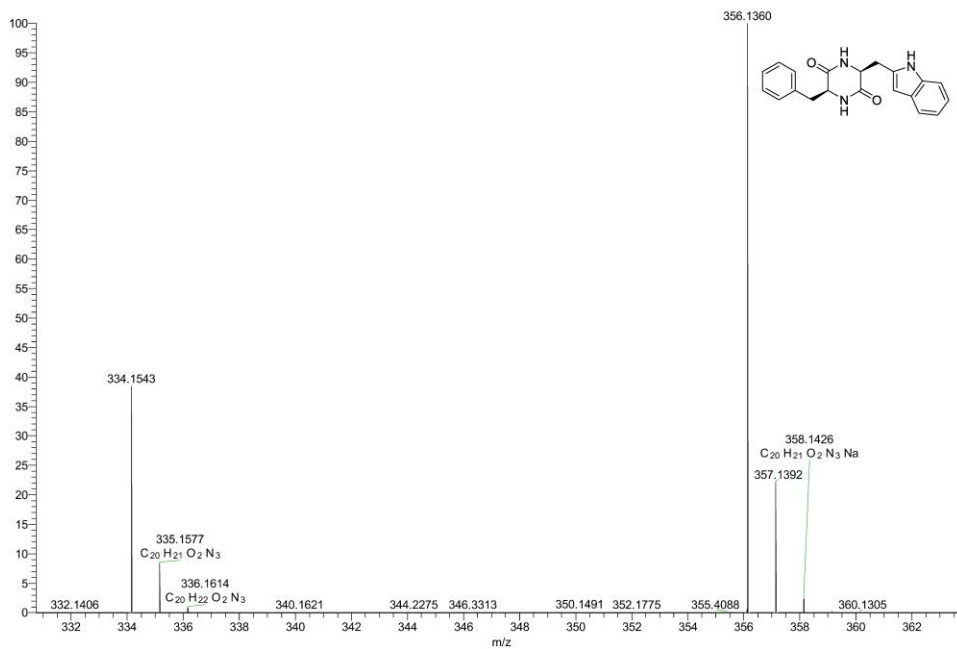

**Figure S81.** HRMS spectrum of **9**.

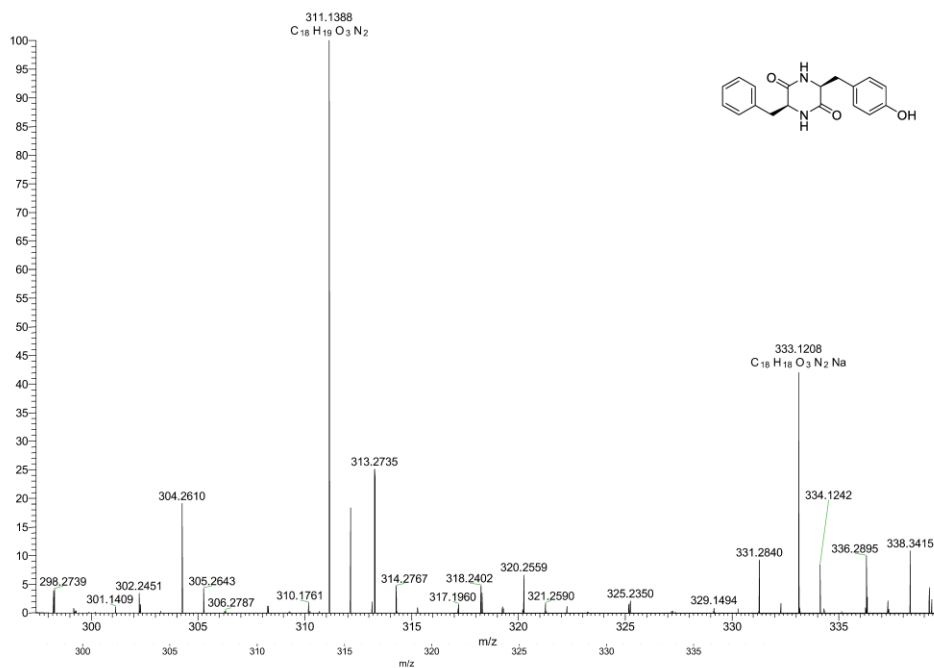

**Figure S82.** HRMS spectrum of **10**.

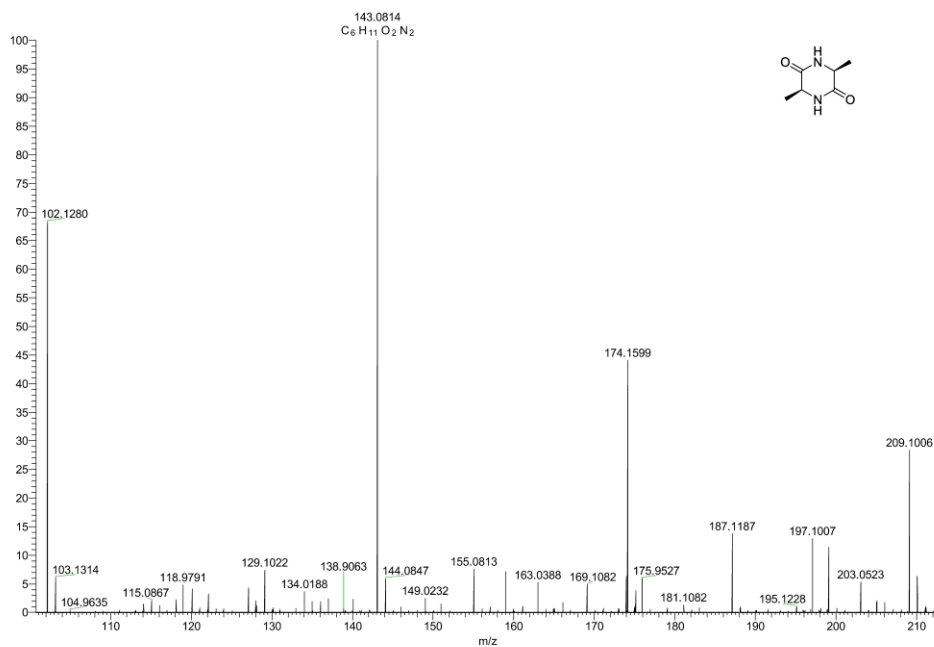

**Figure S83.** HRMS spectrum of **11**.

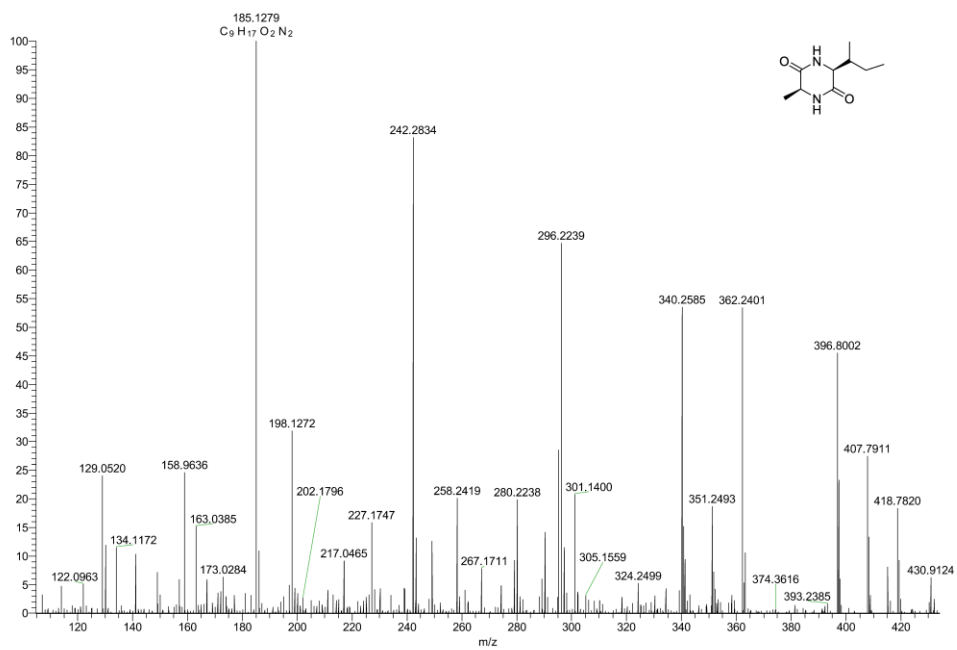

**Figure S84.** HRMS spectrum of 12.

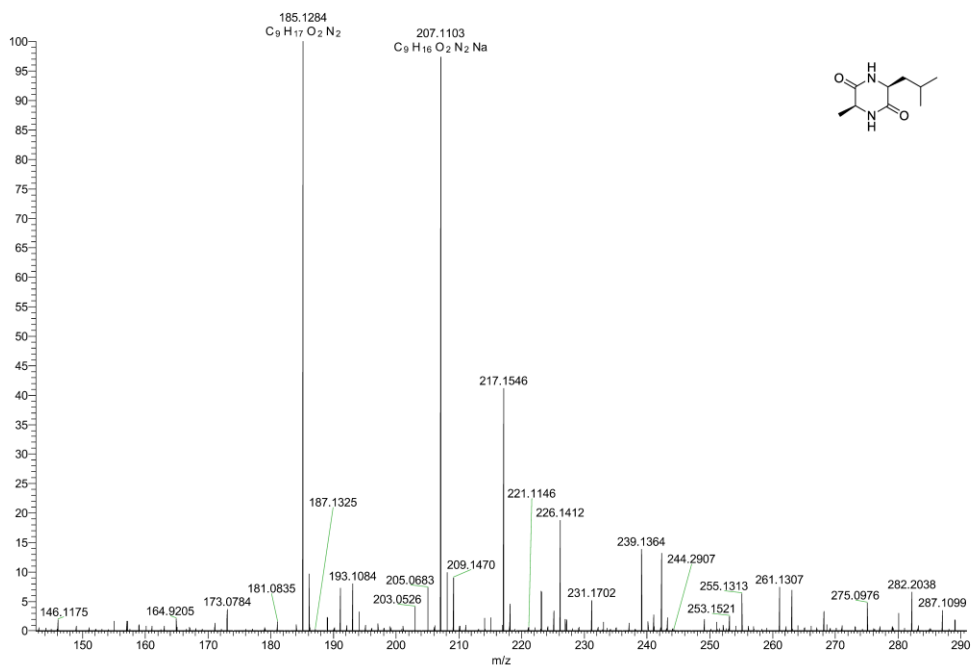

**Figure S85.** HRMS spectrum of 13.

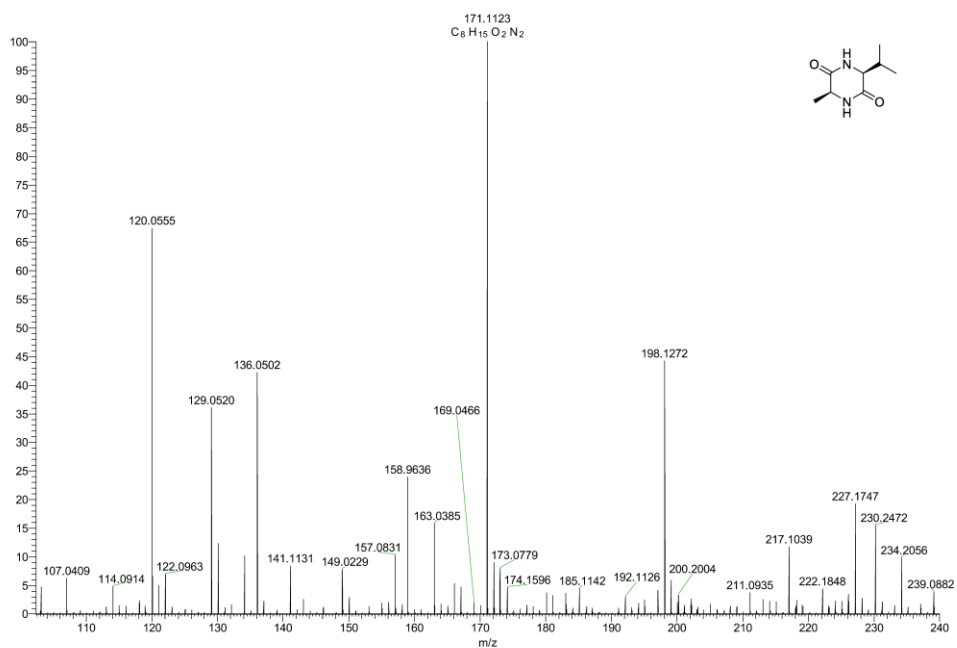

**Figure S86.** HRMS spectrum of 14.

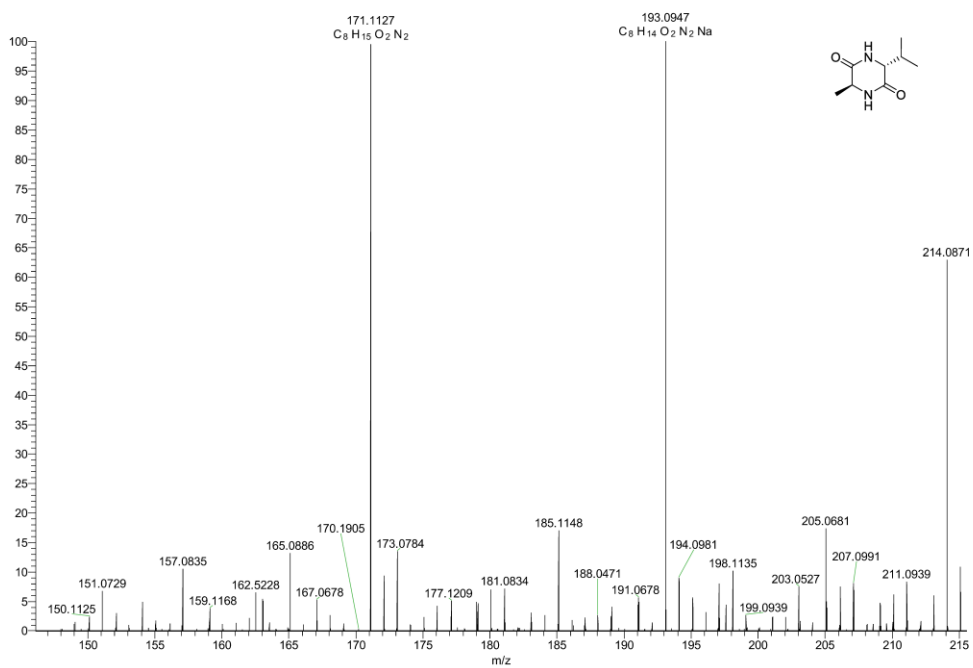

**Figure S87.** HRMS spectrum of 15.

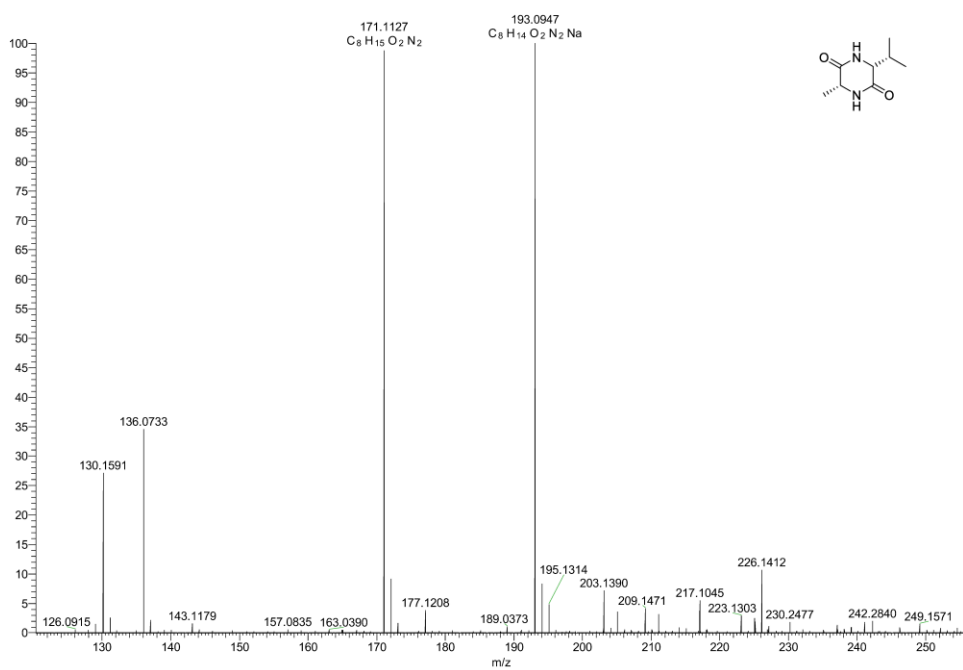

**Figure S88.** HRMS spectrum of 16.

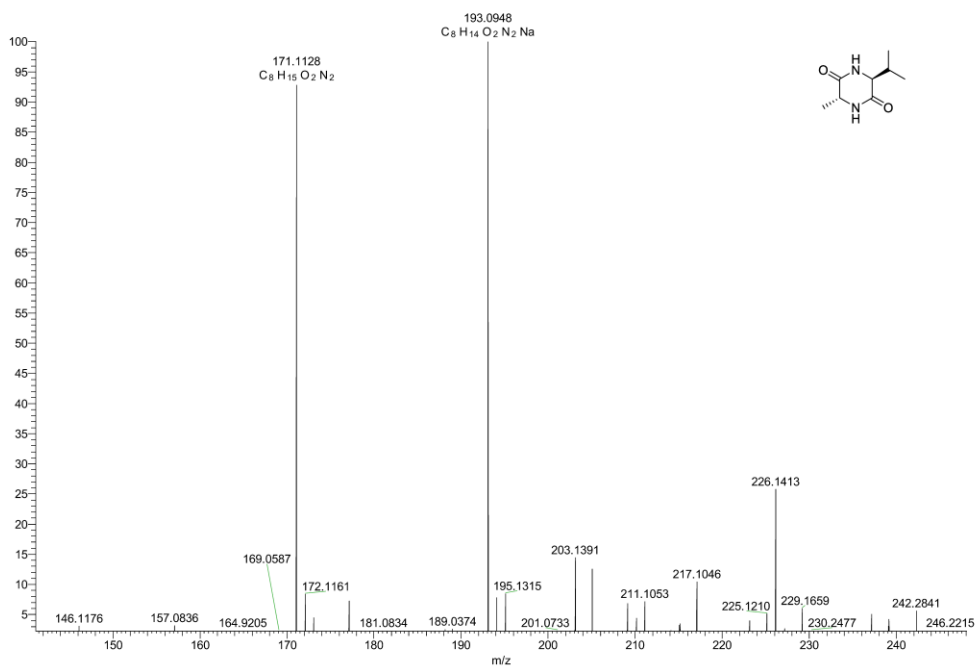

**Figure S89.** HRMS spectrum of 17.

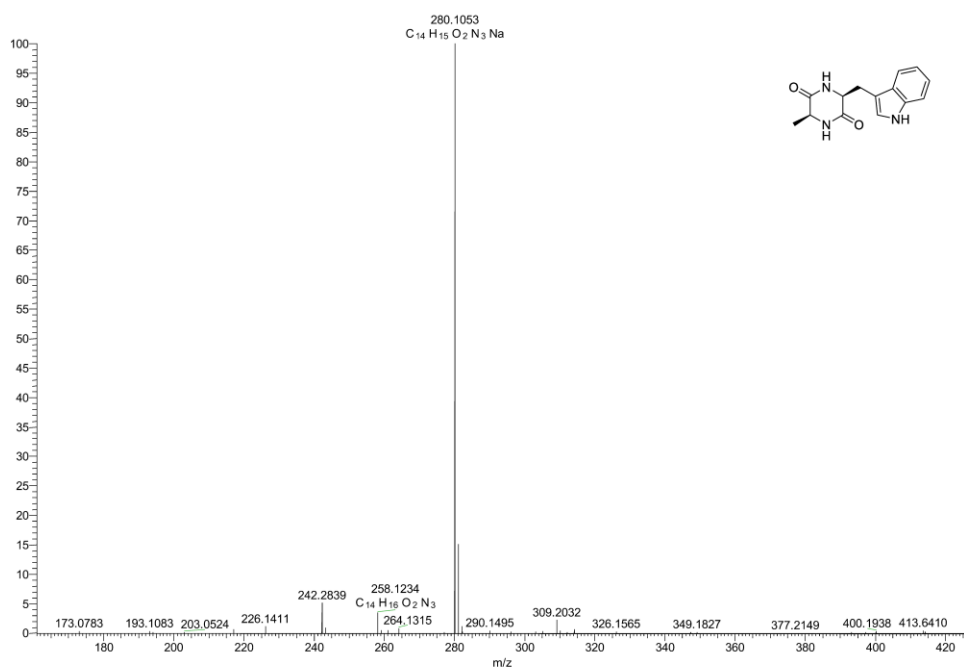

**Figure S90.** HRMS spectrum of **18**.

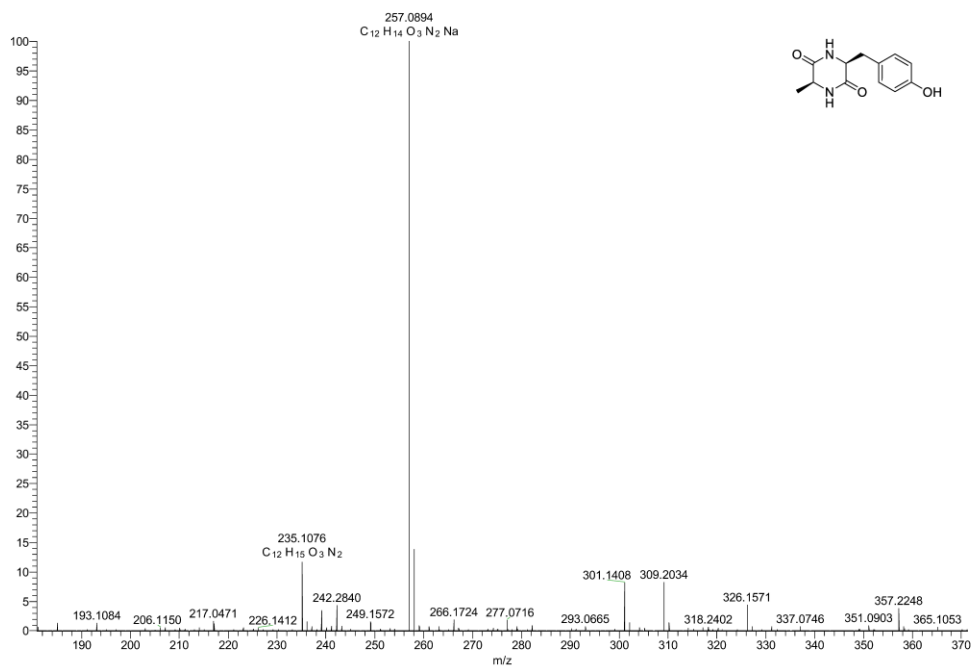

**Figure S91.** HRMS spectrum of **19**.

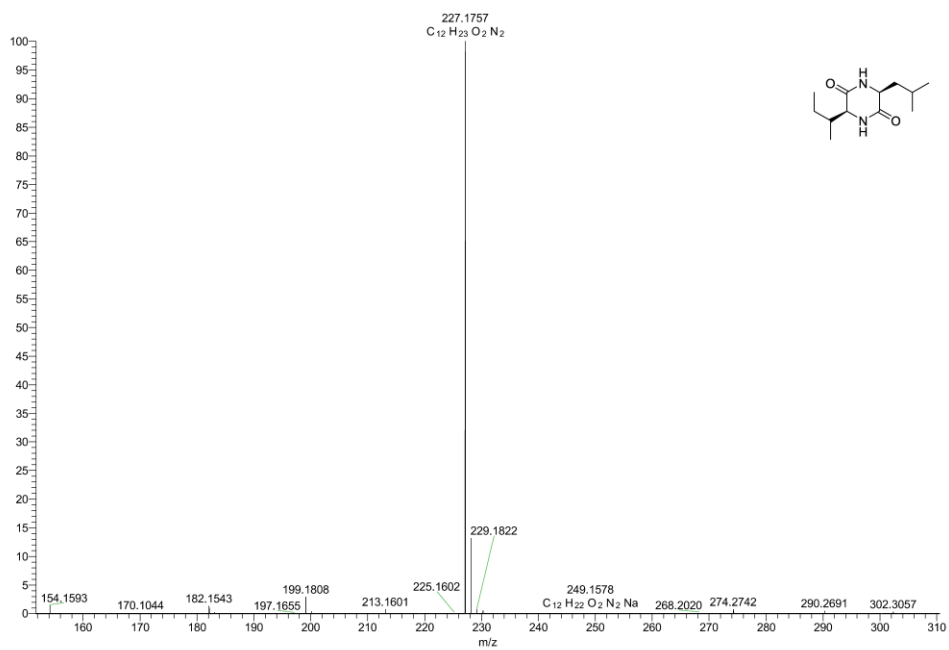

**Figure S92.** HRMS spectrum of **20**.

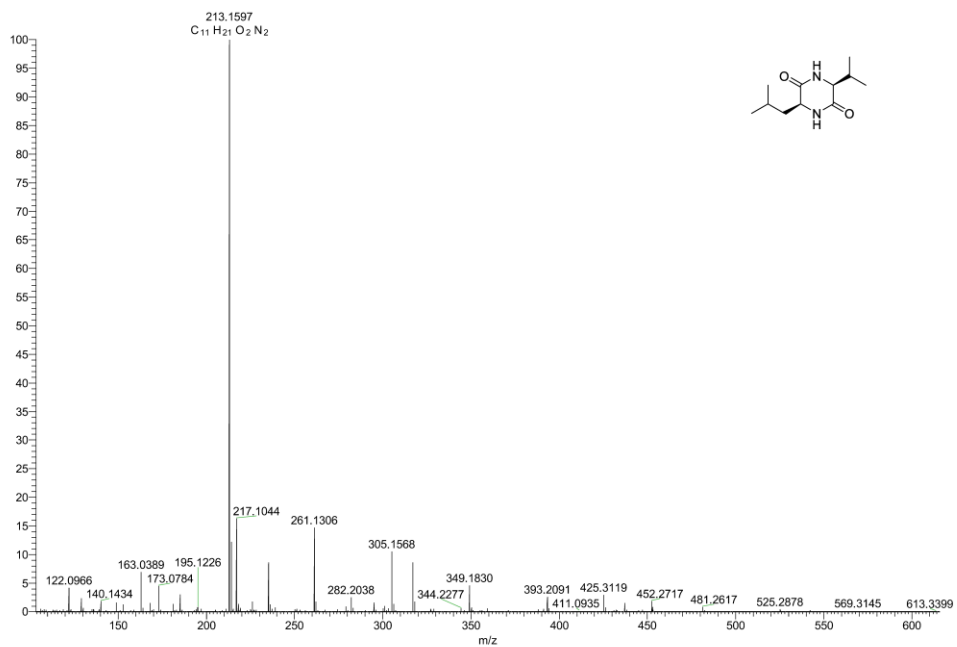

**Figure S93.** HRMS spectrum of **21**.

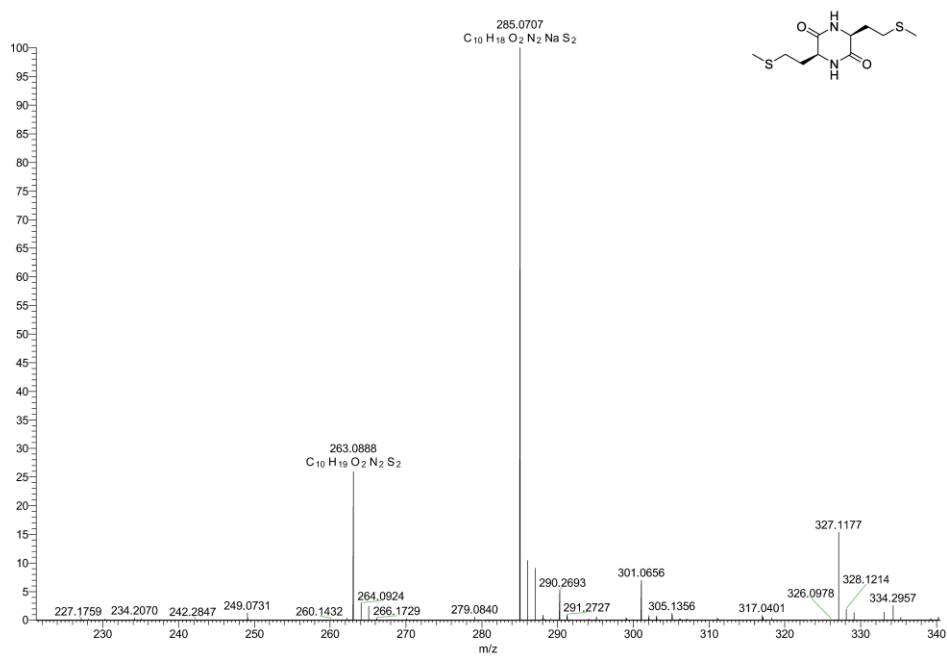

**Figure S94.** HRMS spectrum of 22.

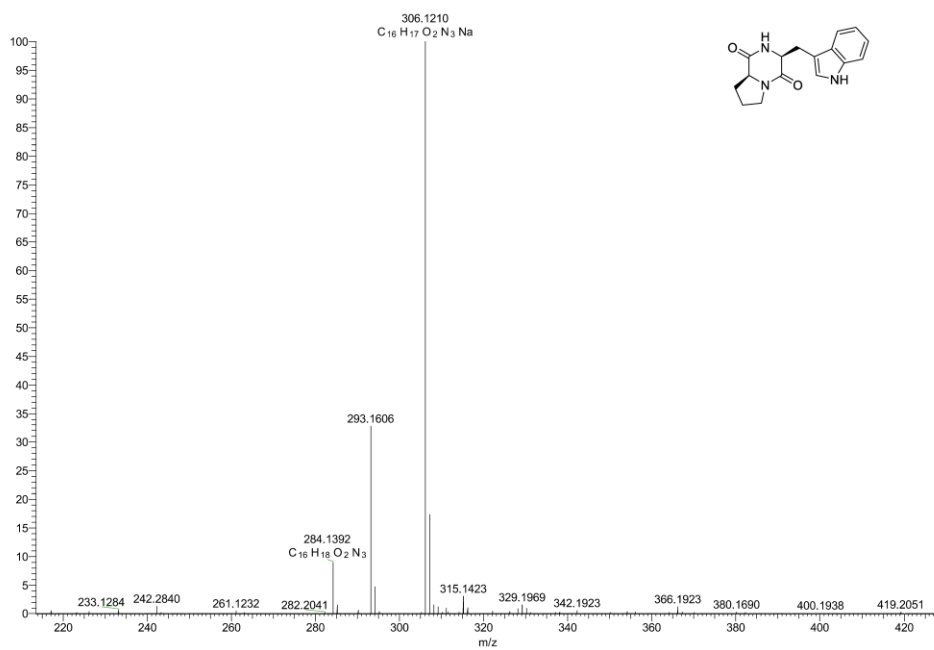

**Figure S95.** HRMS spectrum of 23.

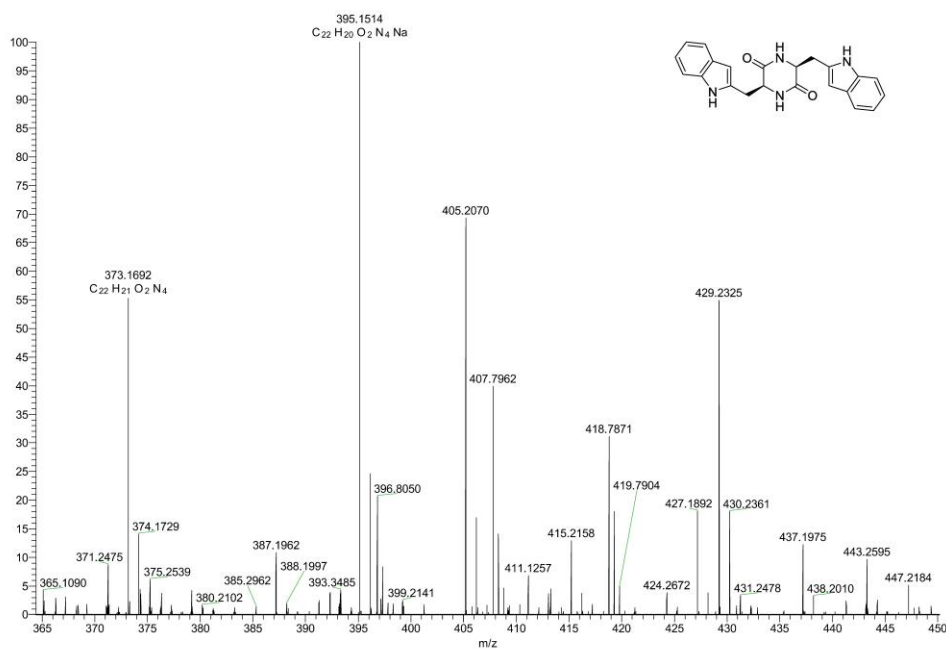

**Figure S96.** HRMS spectrum of **24**.

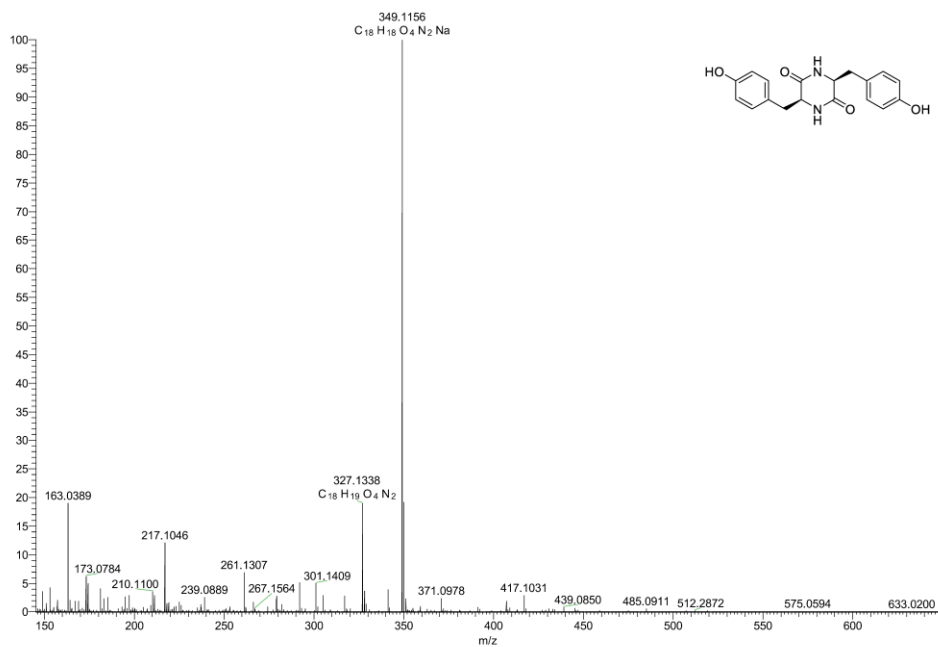

**Figure S97.** HRMS spectrum of **25**.

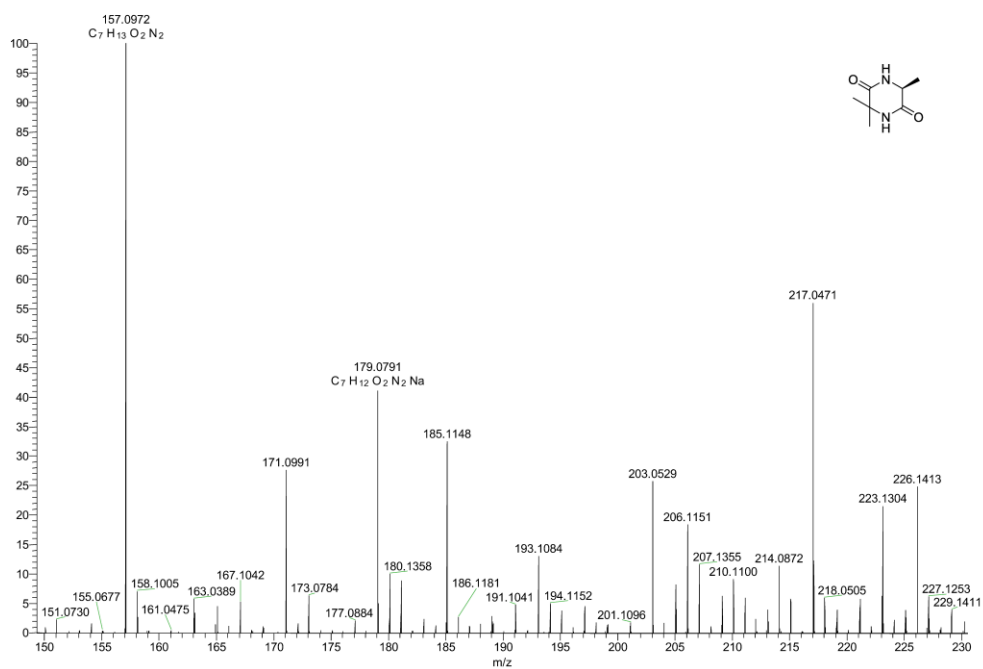

Figure S98. HRMS spectrum of 26.

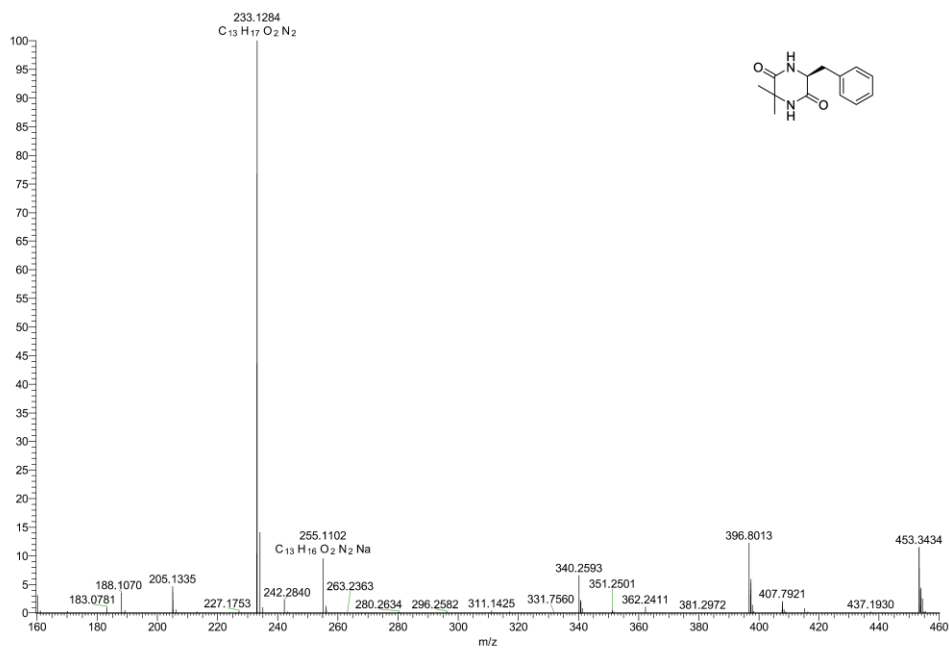

Figure S99. HRMS spectrum of 27.

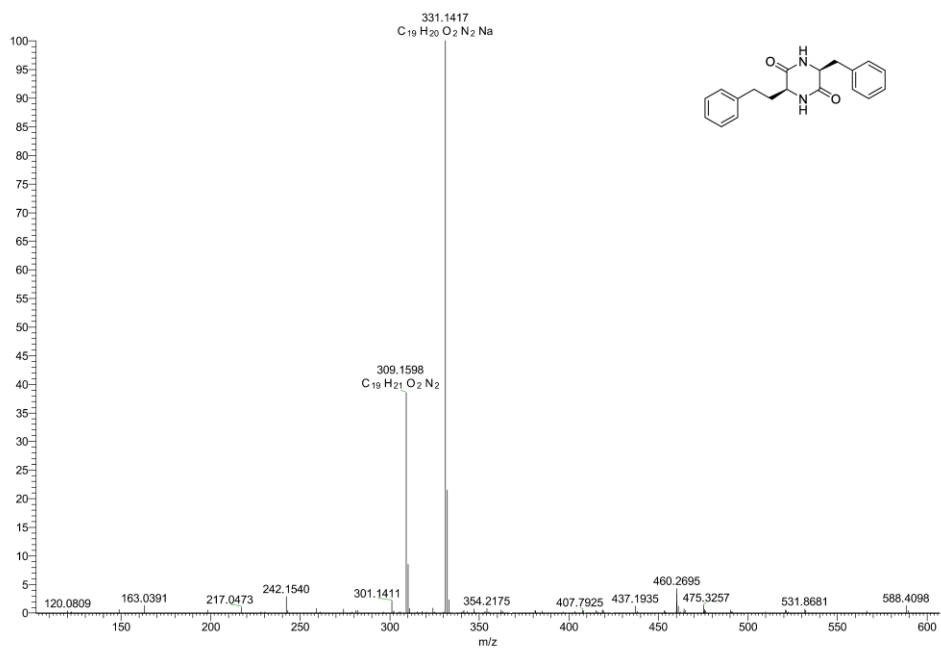

**Figure S100.** HRMS spectrum of **28**.

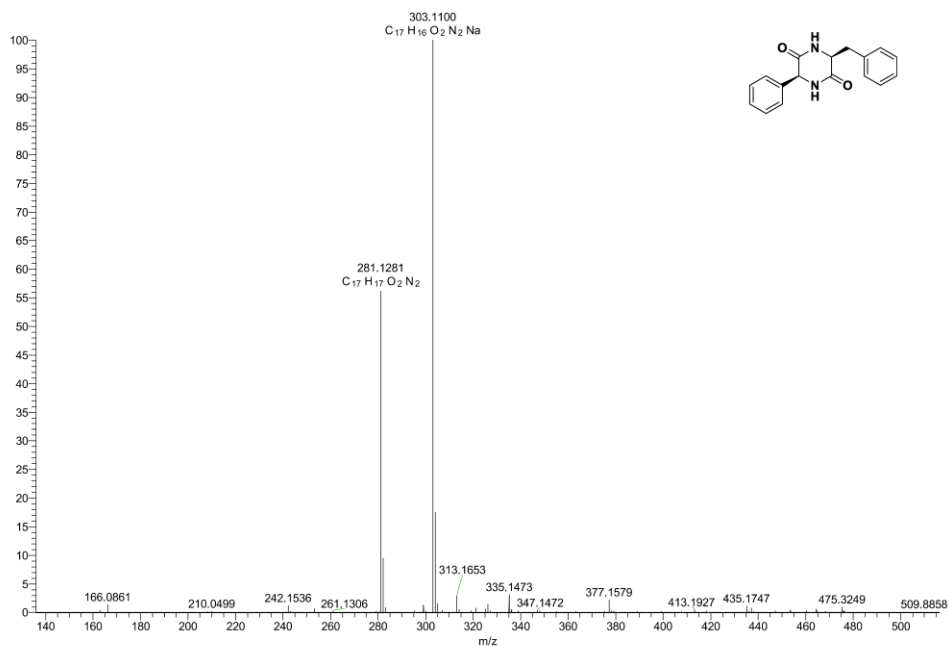

**Figure S101.** HRMS spectrum of **29**.

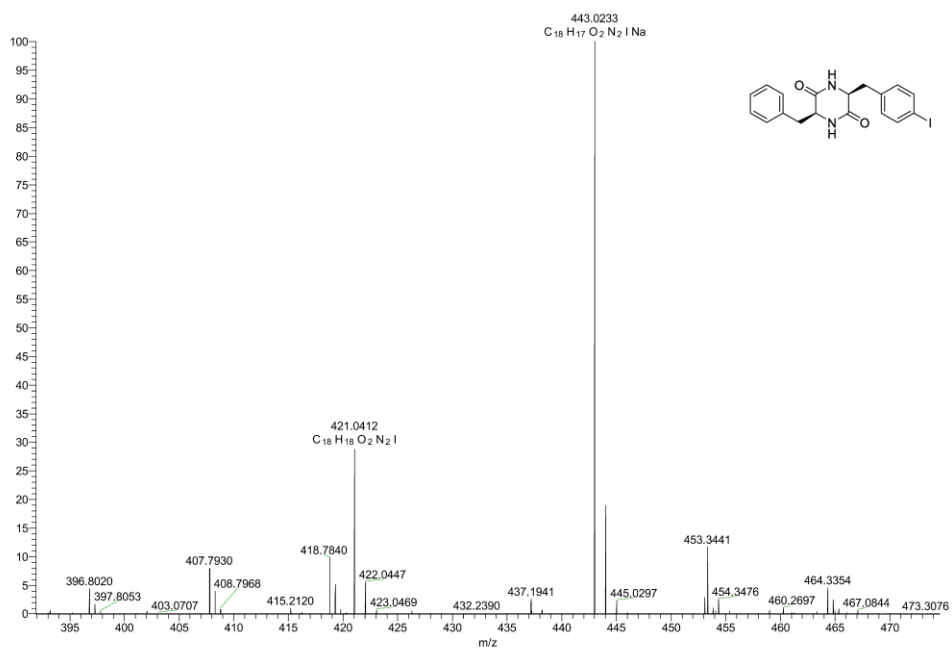

**Figure S102.** HRMS spectrum of **30**.

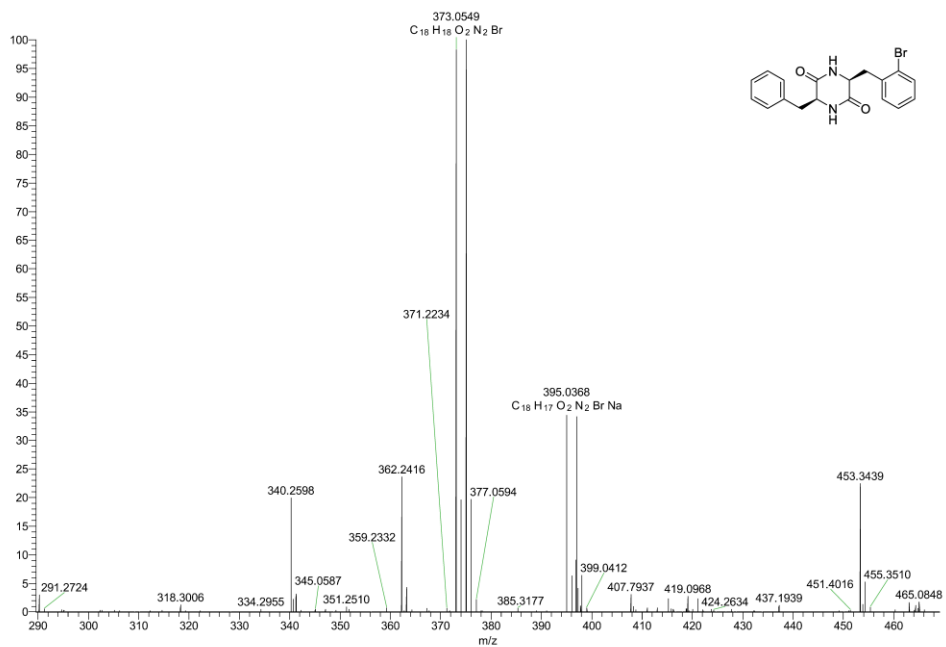

**Figure S103.** HRMS spectrum of **31**.

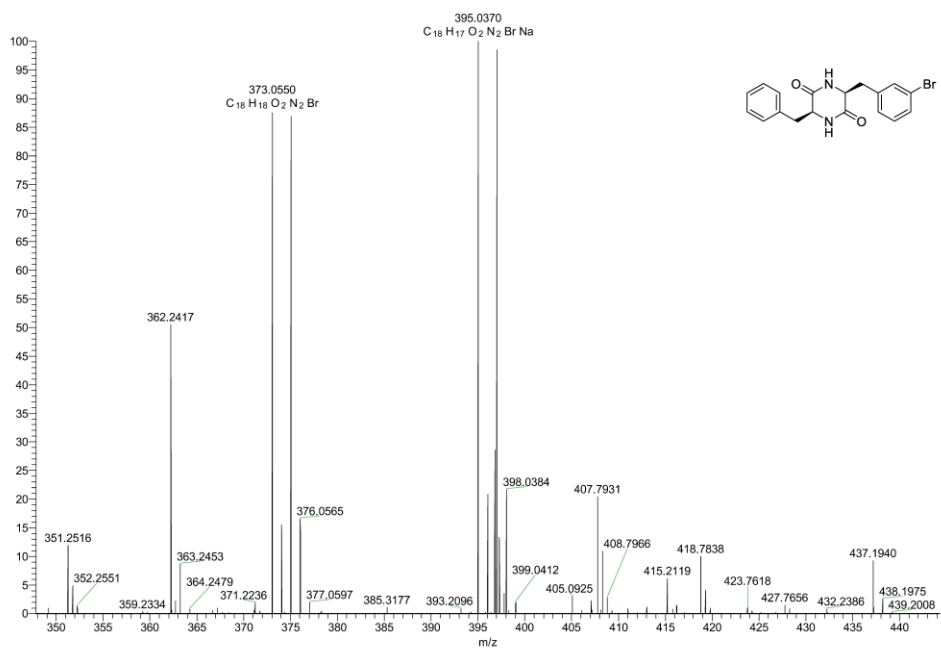

Figure S104. HRMS spectrum of 32.

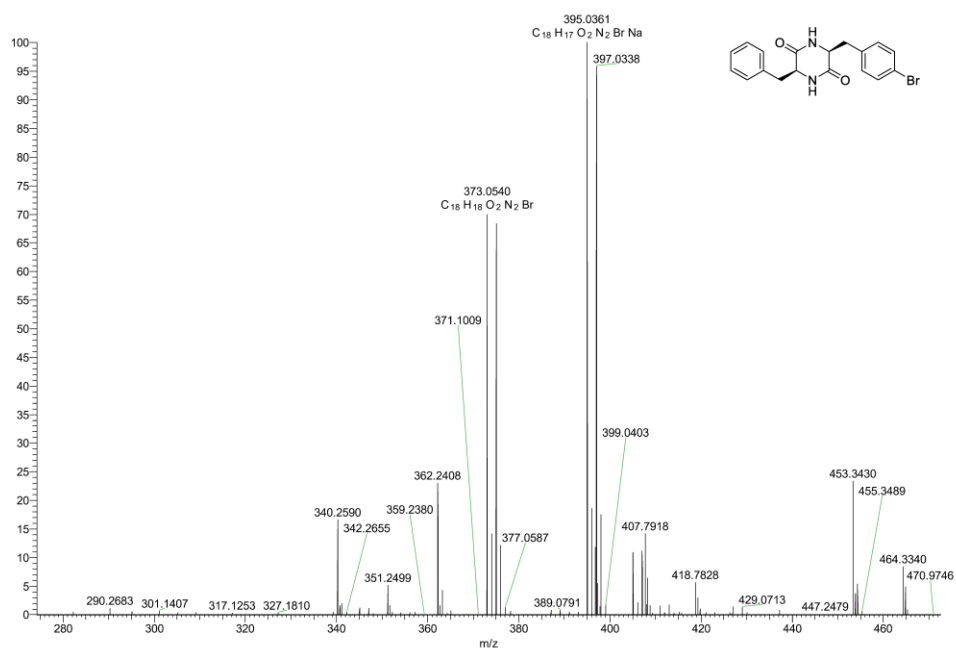

Figure S105. HRMS spectrum of 33.
